# Supplementary material for: Gold(i)-catalyzed synthesis of N-alkenyl 2-pyridonyl sec-amines
Source: Royal Society of Chemistry journal article supplement (doi:10.1039/d4ob00815d), 2024-01-01

## Supplementary Data

**Gold(I)-catalyzed synthesis of *N*-alkenyl 2-pyridonyl *sec*-amines**

**Ali Osman KARATAVUK<sup>a\*</sup>**

**Department of Chemistry, Faculty of Science, Trakya University, Merkez,  
TR-22030 Edirne, Turkey**

**Email:** [aosmankaratavuk@trakya.edu.tr](mailto:aosmankaratavuk@trakya.edu.tr)

## General

All chemical reagents and solvents were purchased from Merck, Acros and Sigma-Aldrich and used without any purification. Solvents were dried with 3 Å molecular sieve activated and used analytical grade. Varian 400 MHz Mercury Magnet were used for  $^1\text{H}$ ,  $^{19}\text{F}$  and  $^{13}\text{C}$  NMR spectra. Abi-Sciex 4600 Triple-Quadropol TOF was used for HRMS results. Thin Layer chromatography (TLC) purchased from Merck was used to monitorize all reactions. Silica gel 60 purchased from Merck was used for column chromatography.

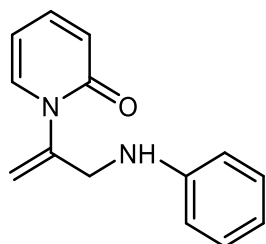

### 1-(3-(Phenylamino)prop-1-en-2-yl)pyridin-2(1H)-one (3a):

Yield: 98%

$^1\text{H}$  NMR (400 MHz,  $\text{CDCl}_3$ )  $\delta$  7.34 (ddd,  $J = 9.0, 6.6, 2.1$  Hz, 1H), 7.15 (t,  $J = 8.0$  Hz, 2H), 7.04 (dd,  $J = 6.8, 2.3$  Hz, 1H), 6.69 (t,  $J = 7.3$  Hz, 1H), 6.62 (d,  $J = 8.7$  Hz, 2H), 6.54 (d,  $J = 9.2$  Hz, 1H), 6.09 (t,  $J = 6.7$  Hz, 1H), 5.51 (s, 1H), 5.24 (s, 1H), 4.23 (s, 3H).

$^{13}\text{C}$  NMR (101 MHz,  $\text{CDCl}_3$ )  $\delta$  162.30, 148.77, 147.37, 140.40, 138.28, 129.31, 121.26, 117.80, 114.09, 112.94, 106.00, 45.95.

HRMS (ESI):  $m/z$   $[\text{M}+\text{H}^+]$  calcd for  $[\text{C}_{14}\text{H}_{14}\text{N}_2\text{O} + \text{H}]^+$ : 227.1179, found: 227.1177.

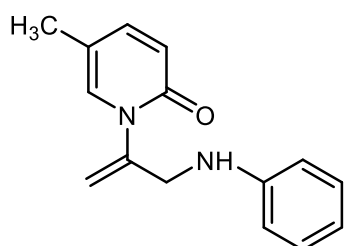

### 5-Methyl-1-(3-(phenylamino)prop-1-en-2-yl)pyridin-2(1H)-one (3b):

Yield: 92%

$^1\text{H}$  NMR (400 MHz,  $\text{CDCl}_3$ )  $\delta$  7.20 (dd,  $J = 9.3, 2.6$  Hz, 1H), 7.15 (t,  $J = 8.0$  Hz, 2H), 6.81 (s, 1H), 6.69 (t,  $J = 7.3$  Hz, 1H), 6.63 (d,  $J = 8.6$  Hz, 2H), 6.49 (d,  $J = 9.3$  Hz, 1H), 5.48 (s, 1H), 5.22 (s, 1H), 4.21 (s, 2H), 1.99 (s, 3H).

$^{13}\text{C}$  NMR (101 MHz,  $\text{CDCl}_3$ )  $\delta$  161.61, 148.76, 147.45, 143.14, 135.61, 129.27, 120.79, 117.78, 115.09, 113.88, 113.05, 46.09, 16.94.

HRMS (ESI):  $m/z$   $[\text{M}+\text{H}^+]$  calcd for  $[\text{C}_{15}\text{H}_{16}\text{N}_2\text{O} + \text{H}]^+$ : 241.1335, found: 241.1338.

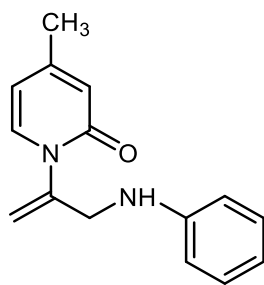

**4-Methyl-1-(3-(phenylamino)prop-1-en-2-yl)pyridin-2(1H)-one (3c):**

Yield: 75%

$^1\text{H}$  NMR (400 MHz,  $\text{CDCl}_3$ )  $\delta$  7.14 (t,  $J = 8.0$  Hz, 2H), 6.92 (d,  $J = 6.9$  Hz, 1H), 6.69 (t,  $J = 7.4$  Hz, 1H), 6.62 (d,  $J = 7.6$  Hz, 2H), 6.34 (s, 1H), 5.94 (dd,  $J = 6.9, 1.9$  Hz, 1H), 5.48 (s, 1H), 5.21 (s, 1H), 4.21 (s, 2H), 2.17 (s, 3H).

$^{13}\text{C}$  NMR (101 MHz,  $\text{CDCl}_3$ )  $\delta$  162.32, 152.28, 148.62, 147.43, 137.10, 129.31, 119.51, 117.77, 113.95, 112.98, 108.68, 46.12, 21.38.

HRMS (ESI):  $m/z$   $[\text{M}+\text{H}^+]$  calcd for  $[\text{C}_{15}\text{H}_{16}\text{N}_2\text{O}+\text{H}]^+$ : 241.1335, found: 241.1341.

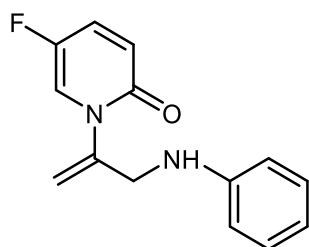

**5-Fluoro-1-(3-(phenylamino)prop-1-en-2-yl)pyridin-2(1H)-one (3d):**

Yield: 41%

$^1\text{H}$  NMR (400 MHz,  $\text{CDCl}_3$ )  $\delta$  7.30 (ddd,  $J = 10.2, 6.8, 3.3$  Hz, 1H), 7.16 (t,  $J = 8.0$  Hz, 2H), 6.99 (t,  $J = 3.6$  Hz, 1H), 6.72 (t,  $J = 7.3$  Hz, 1H), 6.63 (d,  $J = 7.6$  Hz, 2H), 6.52 (dd,  $J = 10.0, 5.2$  Hz, 1H), 5.53 (s, 1H), 5.27 (s, 1H), 4.24 (s, 2H).

$^{13}\text{C}$  NMR (101 MHz,  $\text{CDCl}_3$ )  $\delta$  160.39, 148.52, 147.39 (d,  $J = 232.7$  Hz), 147.25, 132.38 (d,  $J = 24.2$  Hz), 129.43, 123.74 (d,  $J = 37.2$  Hz), 121.89 (d,  $J = 7.3$  Hz), 118.11, 114.50, 113.02, 45.87.

$^{19}\text{F}$  NMR (376 MHz,  $\text{cdcl}_3$ )  $\delta$  -149.32 (dt,  $J = 5.9, 4.3$  Hz).

HRMS (ESI):  $m/z$   $[\text{M}+\text{H}^+]$  calcd for  $[\text{C}_{14}\text{H}_{13}\text{FN}_2\text{O}+\text{H}]^+$ : 245.1085, found: 245.1087.

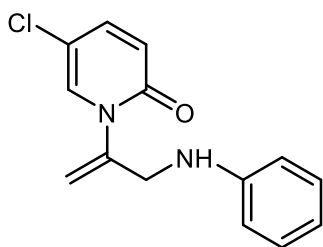

**5-Chloro-1-(3-(phenylamino)prop-1-en-2-yl)pyridin-2(1H)-one (3e):**

Yield: 54%

$^1\text{H}$  NMR (400 MHz,  $\text{CDCl}_3$ )  $\delta$  7.29 (dd,  $J = 9.8, 2.8$  Hz, 1H), 7.17 (t,  $J = 8.0$  Hz, 2H), 7.09 (d,  $J = 2.8$  Hz, 1H), 6.72 (t,  $J = 7.3$  Hz, 1H), 6.63 (d,  $J = 8.8$  Hz, 2H), 6.51 (d,  $J = 9.7$  Hz, 1H), 5.53 (s, 1H), 5.27 (s, 1H), 4.21 (s, 2H).

$^{13}\text{C}$  NMR (101 MHz,  $\text{CDCl}_3$ )  $\delta$  160.72, 148.28, 147.19, 141.36, 135.68, 129.43, 122.08, 118.17, 114.64, 113.08, 112.58, 45.92.

HRMS (ESI):  $m/z$   $[\text{M}+\text{H}^+]$  calcd for  $[\text{C}_{14}\text{H}_{13}\text{ClN}_2\text{O}+\text{H}]^+$ : 261.0789, found: 261.0800.

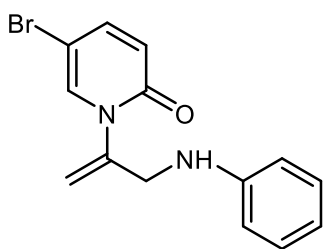

**5-Bromo-1-(3-(phenylamino)prop-1-en-2-yl)pyridin-2(1H)-one (3f):**

Yield: 66%

$^1\text{H}$  NMR (400 MHz,  $\text{CDCl}_3$ )  $\delta$  7.36 (dd,  $J = 9.8, 2.7$  Hz, 1H), 7.22 – 7.12 (m, 3H), 6.72 (t,  $J = 7.4$  Hz, 1H), 6.67 – 6.60 (m, 2H), 6.46 (d,  $J = 9.5$  Hz, 1H), 5.53 (s, 1H), 5.27 (s, 1H), 4.20 (s, 2H).

$^{13}\text{C}$  NMR (101 MHz,  $\text{CDCl}_3$ )  $\delta$  160.73, 148.20, 147.17, 143.40, 137.93, 129.42, 122.43, 118.17, 114.65, 113.09, 98.11, 45.92.

HRMS (ESI):  $m/z$   $[\text{M}+\text{H}^+]$  calcd for  $[\text{C}_{14}\text{H}_{13}\text{BrN}_2\text{O}+\text{H}]^+$ : 305.0284, found: 305.0288.

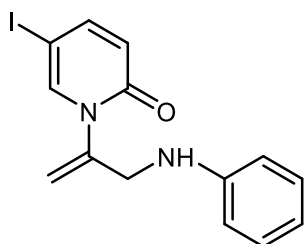

**5-Iodo-1-(3-(phenylamino)prop-1-en-2-yl)pyridin-2(1H)-one (3g):**

Yield: 70%

$^1\text{H}$  NMR (400 MHz,  $\text{CDCl}_3$ )  $\delta$  7.43 (dd,  $J = 9.6, 2.5$  Hz, 1H), 7.24 (d,  $J = 2.5$  Hz, 1H), 7.21 – 7.12 (m, 2H), 6.72 (t,  $J = 7.3$  Hz, 1H), 6.66 – 6.59 (m, 2H), 6.36 (d,  $J = 9.7$  Hz, 1H), 5.52 (s, 1H), 5.25 (s, 1H), 4.19 (s, 2H).

$^{13}\text{C}$  NMR (101 MHz,  $\text{CDCl}_3$ )  $\delta$  160.73, 148.05, 147.76, 147.14, 142.87, 129.42, 123.00, 118.19, 114.65, 113.14, 64.44, 45.94.

HRMS (ESI):  $m/z$  [ $\text{M}+\text{H}^+$ ] calcd for [ $\text{C}_{14}\text{H}_{13}\text{IN}_2\text{O}+\text{H}$ ] $^+$ : 353.0145, found: 353.0148.

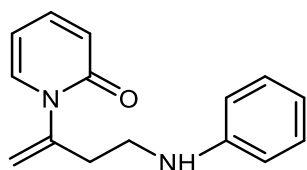

**1-(4-(Phenylamino)but-1-en-2-yl)pyridin-2(1H)-one (4a):**

Yield: 91%

$^1\text{H}$  NMR (400 MHz,  $\text{CDCl}_3$ )  $\delta$  7.35 (ddd,  $J = 9.3, 6.6, 2.1$  Hz, 1H), 7.21 – 7.11 (m, 3H), 6.69 (t,  $J = 7.9$  Hz, 1H), 6.60 (d,  $J = 8.7$  Hz, 2H), 6.56 (d,  $J = 8.3$  Hz, 1H), 6.15 (t,  $J = 6.7$  Hz, 1H), 5.34 (s, 1H), 5.21 (s, 1H), 4.16 (s, 1H), 3.23 (t,  $J = 6.4$  Hz, 2H), 2.83 (t,  $J = 6.4$  Hz, 2H).

$^{13}\text{C}$  NMR (101 MHz,  $\text{CDCl}_3$ )  $\delta$  162.21, 148.07, 147.99, 140.21, 137.86, 129.31, 121.53, 117.43, 115.30, 112.99, 106.05, 40.87, 33.60.

HRMS (ESI):  $m/z$  [ $\text{M}+\text{H}^+$ ] calcd for [ $\text{C}_{15}\text{H}_{16}\text{N}_2\text{O} + \text{H}$ ] $^+$ : 241.1335, found: 241.1336.

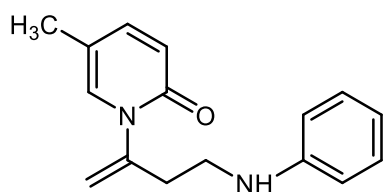

**5-Methyl-1-(4-(phenylamino)but-1-en-2-yl)pyridin-2(1H)-one (4b):**

Yield: 85%

$^1\text{H}$  NMR (400 MHz,  $\text{CDCl}_3$ )  $\delta$  7.21 (dd,  $J = 9.3, 2.6$  Hz, 1H), 7.15 (t,  $J = 8.0$  Hz, 2H), 6.94 (s, 1H), 6.67 (t,  $J = 7.3$  Hz, 1H), 6.59 (d,  $J = 8.7$  Hz, 2H), 6.50 (d,  $J = 9.4$  Hz, 1H), 5.31 (s, 1H), 5.19 (s, 1H), 3.23 (t,  $J = 6.4$  Hz, 2H), 2.80 (t,  $J = 6.4$  Hz, 2H), 2.02 (s, 3H).

$^{13}\text{C}$  NMR (101 MHz,  $\text{CDCl}_3$ )  $\delta$  161.47, 148.09, 147.95, 142.91, 135.17, 129.28, 121.05, 117.34, 115.14, 115.08, 112.99, 40.92, 33.69, 17.00.

HRMS (ESI):  $m/z$  [ $\text{M}+\text{H}^+$ ] calcd for [ $\text{C}_{16}\text{H}_{18}\text{N}_2\text{O}+\text{H}$ ] $^+$ : 255.1492, found: 255.1499.

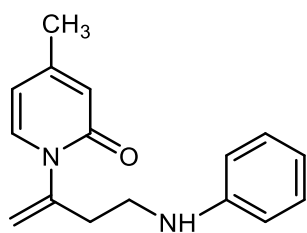

**4-Methyl-1-(4-(phenylamino)but-1-en-2-yl)pyridin-2(1H)-one (4c):**

Yield: 85%

$^1\text{H}$  NMR (400 MHz,  $\text{CDCl}_3$ )  $\delta$  7.15 (t,  $J = 7.5$  Hz, 2H), 7.06 (d,  $J = 6.9$  Hz, 1H), 6.68 (td,  $J = 7.3, 1.1$  Hz, 1H), 6.59 (d,  $J = 8.6$  Hz, 2H), 6.36 (s, 1H), 5.99 (dd,  $J = 6.9, 2.0$  Hz, 1H), 5.31 (s, 1H), 5.17 (s, 1H), 3.21 (t,  $J = 6.4$  Hz, 2H), 2.81 (t,  $J = 6.4$  Hz, 2H), 2.18 (s, 3H).

$^{13}\text{C}$  NMR (101 MHz,  $\text{CDCl}_3$ )  $\delta$  162.20, 152.03, 148.08, 147.77, 136.67, 129.27, 119.70, 117.37, 115.16, 112.99, 108.67, 40.87, 33.66, 21.34.

HRMS (ESI):  $m/z$  [ $\text{M}+\text{H}^+$ ] calcd for  $[\text{C}_{16}\text{H}_{18}\text{N}_2\text{O}+\text{H}]^+$ : 255.1492, found: 255.1495.

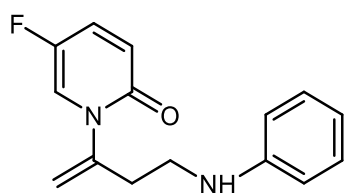

**5-Fluoro-1-(4-(phenylamino)but-1-en-2-yl)pyridin-2(1H)-one (4d):**

Yield: 88%

$^1\text{H}$  NMR (400 MHz,  $\text{CDCl}_3$ )  $\delta$  7.31 (ddd,  $J = 10.0, 6.8, 3.3$  Hz, 1H), 7.21 – 7.10 (m, 3H), 6.70 (t,  $J = 7.4$  Hz, 1H), 6.60 (d,  $J = 8.6$  Hz, 2H), 6.53 (dd,  $J = 10.0, 5.1$  Hz, 1H), 5.35 (s, 1H), 5.23 (s, 1H), 3.25 (t,  $J = 6.4$  Hz, 2H), 2.82 (t,  $J = 6.4$  Hz, 2H).

$^{13}\text{C}$  NMR (101 MHz,  $\text{CDCl}_3$ )  $\delta$  160.24, 147.95, 147.53, 147.36 (d,  $J = 233.1$  Hz), 132.16 (d,  $J = 24.2$  Hz), 129.34, 123.27 (d,  $J = 37.2$  Hz), 122.10 (d,  $J = 7.3$  Hz), 117.58, 115.73, 113.03, 40.92, 33.41.

$^{19}\text{F}$  NMR (376 MHz,  $\text{CDCl}_3$ )  $\delta$  -149.09 – -149.17 (m).

HRMS (ESI):  $m/z$  [ $\text{M}+\text{H}^+$ ] calcd for  $[\text{C}_{15}\text{H}_{15}\text{FN}_2\text{O}+\text{H}]^+$ : 259.1241, found: 259.1251.

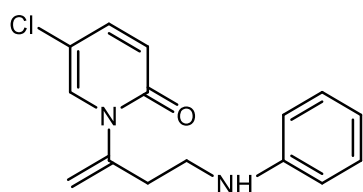

**5-Chloro-1-(4-(phenylamino)but-1-en-2-yl)pyridin-2(1H)-one (4e):**

Yield: 82%

$^1\text{H}$  NMR (400 MHz,  $\text{CDCl}_3$ )  $\delta$  7.30 (dd,  $J = 9.7, 2.9$  Hz, 1H), 7.24 (d,  $J = 2.9$  Hz, 1H), 7.17 (t,  $J = 8.0$  Hz, 2H), 6.70 (t,  $J = 7.3$  Hz, 1H), 6.60 (d,  $J = 8.7$  Hz, 2H), 6.53 (d,  $J = 9.9$  Hz, 1H), 5.36 (s, 1H), 5.23 (s, 1H), 3.26 (t,  $J = 6.4$  Hz, 2H), 2.80 (t,  $J = 6.4$  Hz, 2H).

$^{13}\text{C}$  NMR (101 MHz,  $\text{CDCl}_3$ )  $\delta$  160.61, 147.89, 147.36, 141.18, 135.25, 129.36, 122.29, 117.63, 115.86, 113.06, 112.64, 40.94, 33.48.

HRMS (ESI):  $m/z$   $[\text{M}+\text{H}^+]$  calcd for  $[\text{C}_{15}\text{H}_{15}\text{ClN}_2\text{O} + \text{H}]^+$ : 275.0946, found: 275.0957.

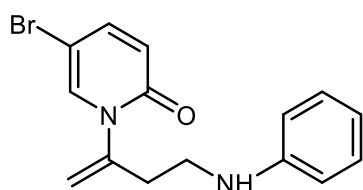

**5-Bromo-1-(4-(phenylamino)but-1-en-2-yl)pyridin-2(1H)-one (4f):**

Yield: 78%

$^1\text{H}$  NMR (400 MHz,  $\text{CDCl}_3$ )  $\delta$  7.37 (dd,  $J = 9.7, 2.7$  Hz, 1H), 7.32 (d,  $J = 2.6$  Hz, 1H), 7.17 (t,  $J = 8.0$  Hz, 2H), 6.70 (t,  $J = 7.3$  Hz, 1H), 6.60 (d,  $J = 8.7$  Hz, 2H), 6.48 (d,  $J = 9.7$  Hz, 1H), 5.35 (s, 1H), 5.23 (s, 1H), 4.13 (s, 1H), 3.26 (t,  $J = 6.5$  Hz, 2H), 2.79 (t,  $J = 6.4$  Hz, 2H).

$^{13}\text{C}$  NMR (101 MHz,  $\text{CDCl}_3$ )  $\delta$  160.61, 147.89, 147.34, 143.20, 137.50, 129.36, 122.67, 117.61, 115.83, 113.05, 98.16, 40.95, 33.51.

HRMS (ESI):  $m/z$   $[\text{M}+\text{H}^+]$  calcd for  $[\text{C}_{15}\text{H}_{15}\text{BrN}_2\text{O} + \text{H}]^+$ : 319.0441, found: 319.0452.

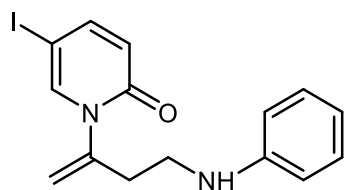

**5-Iodo-1-(4-(phenylamino)but-1-en-2-yl)pyridin-2(1H)-one (4g):**

Yield: 78%

$^1\text{H}$  NMR (400 MHz,  $\text{CDCl}_3$ )  $\delta$  7.44 (dd,  $J = 9.5, 2.5$  Hz, 1H), 7.44 – 7.39 (m, 1H), 7.17 (t,  $J = 8.0$  Hz, 2H), 6.74 – 6.66 (m, 1H), 6.60 (d,  $J = 8.7$  Hz, 2H), 6.38 (d,  $J = 9.6$  Hz, 1H), 5.34 (s, 1H), 5.22 (s, 1H), 3.26 (t,  $J = 6.4$  Hz, 2H), 2.78 (t,  $J = 6.4$  Hz, 2H).

$^{13}\text{C}$  NMR (101 MHz,  $\text{CDCl}_3$ )  $\delta$  160.61, 147.85, 147.56, 147.21, 142.42, 129.37, 123.24, 117.62, 115.79, 113.07, 64.54, 40.97, 33.54.

HRMS (ESI):  $m/z$   $[M+H]^+$  calcd for  $[C_{15}H_{15}IN_2O + H]^+$ : 367.0302, found: 367.0308.

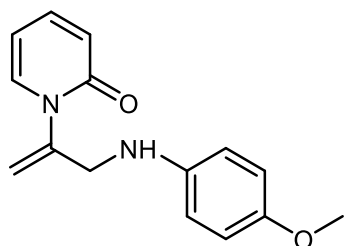

**1-(3-((4-Methoxyphenyl)amino)prop-1-en-2-yl)pyridin-2(1H)-one (3aa):**

Yield: 95%

$^1H$  NMR (400 MHz,  $CDCl_3$ )  $\delta$  7.33 (ddd,  $J = 9.2, 6.6, 2.1$  Hz, 1H), 7.01 (dd,  $J = 6.8, 2.1$  Hz, 1H), 6.74 (d,  $J = 9.0$  Hz, 2H), 6.58 (d,  $J = 8.9$  Hz, 2H), 6.53 (d,  $J = 9.3$  Hz, 1H), 6.08 (t,  $J = 6.7$  Hz, 1H), 5.48 (s, 1H), 5.22 (s, 1H), 4.17 (s, 2H), 3.97 (s, 1H), 3.71 (s, 3H).

$^{13}C$  NMR (101 MHz,  $CDCl_3$ )  $\delta$  162.28, 152.28, 149.04, 141.46, 140.37, 138.33, 121.25, 114.93, 114.23, 114.08, 105.94, 55.80, 46.72.

HRMS (ESI):  $m/z$   $[M+H]^+$  calcd for  $[C_{15}H_{16}N_2O_2 + H]^+$ : 257.1285, found: 257.1287.

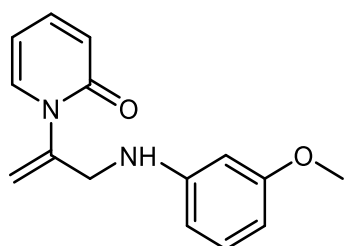

**1-(3-((3-Methoxyphenyl)amino)prop-1-en-2-yl)pyridin-2(1H)-one (3ab):**

Yield: 94%

$^1H$  NMR (400 MHz,  $CDCl_3$ )  $\delta$  7.33 (ddd,  $J = 9.1, 6.6, 2.1$  Hz, 1H), 7.09 – 6.99 (m, 2H), 6.53 (d,  $J = 8.9$  Hz, 1H), 6.29 – 6.17 (m, 3H), 6.09 (td,  $J = 6.7, 1.3$  Hz, 1H), 5.50 (s, 1H), 5.24 (s, 1H), 4.32 (s, 1H), 4.20 (s, 2H), 3.74 (s, 3H).

$^{13}C$  NMR (101 MHz,  $CDCl_3$ )  $\delta$  162.29, 160.85, 148.82, 148.65, 140.42, 138.30, 130.03, 121.21, 114.10, 106.03, 106.00, 103.01, 98.88, 55.15, 45.95.

HRMS (ESI):  $m/z$   $[M+H]^+$  calcd for  $[C_{15}H_{16}N_2O_2 + H]^+$ : 257.1285, found: 257.1285.



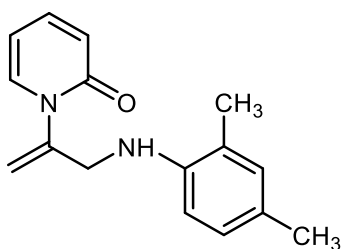

**1-(3-((2,4-Dimethylphenyl)amino)prop-1-en-2-yl)pyridin-2(1H)-one (3ac):**

Yield: 95%

$^1\text{H}$  NMR (400 MHz,  $\text{CDCl}_3$ )  $\delta$  7.34 (ddd,  $J = 9.2, 6.6, 2.1$  Hz, 1H), 6.98 (dd,  $J = 6.8, 2.1$  Hz, 1H), 6.91 (d,  $J = 8.0$  Hz, 1H), 6.84 (s, 1H), 6.56 (t,  $J = 8.4$  Hz, 2H), 6.08 (t,  $J = 6.7$  Hz, 1H), 5.50 (s, 1H), 5.25 (s, 1H), 4.28 (s, 2H), 3.99 (s, 1H), 2.21 (s, 3H), 2.02 (s, 3H).

$^{13}\text{C}$  NMR (101 MHz,  $\text{CDCl}_3$ )  $\delta$  162.35, 148.74, 142.82, 140.37, 138.27, 131.10, 127.33, 126.48, 122.22, 121.17, 114.22, 110.24, 105.92, 46.08, 20.40, 17.40.

HRMS (ESI):  $m/z$   $[\text{M}+\text{H}^+]$  calcd for  $[\text{C}_{16}\text{H}_{18}\text{N}_2\text{O} + \text{H}]^+$ : 255.1492, found: 255.1490.

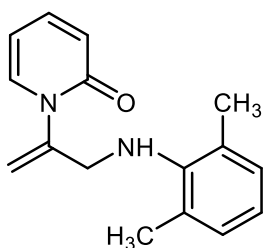

**1-(3-((2,6-Dimethylphenyl)amino)prop-1-en-2-yl)pyridin-2(1H)-one (3ad):**

Yield: 11%

$^1\text{H}$  NMR (400 MHz,  $\text{CDCl}_3$ )  $\delta$  7.35 (ddd,  $J = 9.2, 6.6, 2.1$  Hz, 1H), 6.96 – 6.86 (m, 3H), 6.78 (t,  $J = 7.5$  Hz, 1H), 6.55 (d,  $J = 9.3$  Hz, 1H), 6.09 (td,  $J = 6.6, 1.3$  Hz, 1H), 5.49 (s, 1H), 5.19 (s, 1H), 4.12 (s, 2H), 2.18 (s, 6H).

$^{13}\text{C}$  NMR (101 MHz,  $\text{CDCl}_3$ )  $\delta$  162.43, 150.32, 144.84, 140.36, 138.50, 129.13, 129.01, 121.98, 121.29, 114.55, 105.93, 49.53, 18.62.

HRMS (ESI):  $m/z$   $[\text{M}+\text{H}^+]$  calcd for  $[\text{C}_{16}\text{H}_{18}\text{N}_2\text{O} + \text{H}]^+$ : 255.1492, found: 255.1493.

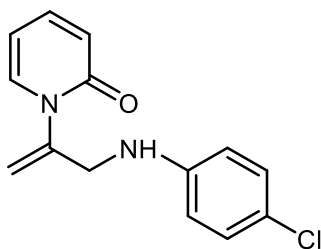

**1-(3-((4-Chlorophenyl)amino)prop-1-en-2-yl)pyridin-2(1H)-one (3ae):**

Yield: 93%

$^1\text{H}$  NMR (400 MHz,  $\text{CDCl}_3$ )  $\delta$  7.33 (ddd,  $J = 9.3, 6.6, 2.1$  Hz, 1H), 7.07 (d,  $J = 8.9$  Hz, 2H), 7.02 (dd,  $J = 6.8, 1.4$  Hz, 1H), 6.55 (d,  $J = 9.0$  Hz, 2H), 6.52 (d,  $J = 9.2$  Hz, 1H), 6.10 (td,  $J = 6.7, 1.3$  Hz, 1H), 5.47 (s, 1H), 5.24 (s, 1H), 4.36 (s, 1H), 4.19 (s, 2H).

$^{13}\text{C}$  NMR (101 MHz,  $\text{CDCl}_3$ )  $\delta$  162.29, 148.47, 145.97, 140.49, 138.15, 129.13, 122.29, 121.30, 114.16, 114.04, 106.15, 45.96.

HRMS (ESI):  $m/z$   $[\text{M}+\text{H}^+]$  calcd for  $[\text{C}_{14}\text{H}_{13}\text{ClN}_2\text{O} + \text{H}]^+$ : 261.0789, found: 261.0788.

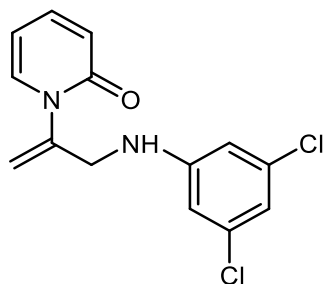

**1-(3-((3,5-Dichlorophenyl)amino)prop-1-en-2-yl)pyridin-2(1H)-one (3af):**

Yield: 78%

$^1\text{H}$  NMR (400 MHz,  $\text{CDCl}_3$ )  $\delta$  7.36 (ddd,  $J = 9.1, 6.6, 2.1$  Hz, 1H), 7.07 (dd,  $J = 6.8, 2.1$  Hz, 1H), 6.64 (t,  $J = 1.8$  Hz, 1H), 6.53 (d,  $J = 8.4$  Hz, 1H), 6.50 (d,  $J = 1.9$  Hz, 2H), 6.15 (t,  $J = 6.7$  Hz, 1H), 5.50 (s, 1H), 5.28 (s, 1H), 4.77 (t,  $J = 6.2$  Hz, 1H), 4.18 (d,  $J = 6.3$  Hz, 2H).

$^{13}\text{C}$  NMR (101 MHz,  $\text{CDCl}_3$ )  $\delta$  162.39, 149.21, 147.84, 140.65, 138.03, 135.56, 121.38, 117.46, 114.59, 111.11, 106.43, 45.74.

HRMS (ESI):  $m/z$   $[\text{M}+\text{H}^+]$  calcd for  $[\text{C}_{14}\text{H}_{12}\text{Cl}_2\text{N}_2\text{O} + \text{H}]^+$ : 295.0399, found: 295.0402.

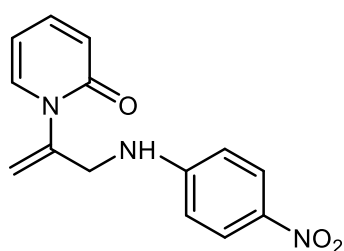

**1-(3-((4-Nitrophenyl)amino)prop-1-en-2-yl)pyridin-2(1H)-one (3ag):**

Yield: 21%

$^1\text{H}$  NMR (400 MHz,  $\text{CD}_3\text{OD}$ )  $\delta$  8.02 (d,  $J = 9.3$  Hz, 2H), 7.56 (ddd,  $J = 9.0, 6.7, 2.1$  Hz, 1H), 7.37 (dd,  $J = 6.7, 2.1$  Hz, 1H), 6.76 (d,  $J = 9.3$  Hz, 2H), 6.55 (d,  $J = 9.2$  Hz, 1H), 6.35 (td,  $J = 6.7, 1.3$  Hz, 1H), 5.55 (s, 1H), 5.33 (s, 1H), 4.28 (s, 2H).

$^{13}\text{C}$  NMR (101 MHz,  $\text{CD}_3\text{OD}$ )  $\delta$  164.30, 155.36, 148.67, 143.07, 140.19, 138.87, 127.10, 121.16, 115.13, 112.50, 108.51, 45.42.

HRMS (ESI):  $m/z$   $[M+H]^+$  calcd for  $[C_{14}H_{13}N_3O_3 + H]^+$ : 272.1030, found: 272.1029.

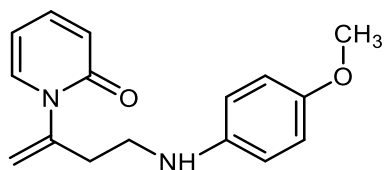

**1-(4-((4-Methoxyphenyl)amino)but-1-en-2-yl)pyridin-2(1H)-one (4aa):**

Yield: 88%

$^1H$  NMR (400 MHz,  $CDCl_3$ )  $\delta$  7.34 (ddd,  $J = 9.2, 6.6, 2.1$  Hz, 1H), 7.21 – 7.14 (m, 1H), 6.75 (d,  $J = 9.0$  Hz, 2H), 6.60 – 6.51 (m, 3H), 6.14 (td,  $J = 6.7, 1.3$  Hz, 1H), 5.32 (s, 1H), 5.19 (s, 1H), 3.72 (s, 3H), 3.16 (t,  $J = 6.4$  Hz, 2H), 2.80 (t,  $J = 6.4$  Hz, 2H).

$^{13}C$  NMR (101 MHz,  $CDCl_3$ )  $\delta$  162.18, 152.17, 147.97, 142.29, 140.18, 137.88, 121.46, 115.27, 114.95, 114.38, 105.99, 55.85, 41.80, 33.74.

HRMS (ESI):  $m/z$   $[M+H]^+$  calcd for  $[C_{16}H_{18}N_2O_2 + H]^+$ : 271.1441, found: 271.1439.

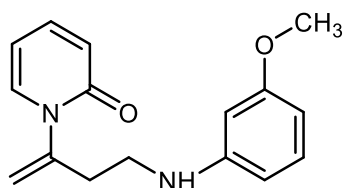

**1-(4-((3-Methoxyphenyl)amino)but-1-en-2-yl)pyridin-2(1H)-one (4ab):**

Yield: 86%

$^1H$  NMR (400 MHz,  $CDCl_3$ )  $\delta$  7.34 (ddd,  $J = 8.8, 6.5, 2.1$  Hz, 1H), 7.17 (ddd,  $J = 6.8, 2.1, 0.8$  Hz, 1H), 7.04 (t,  $J = 8.1$  Hz, 1H), 6.55 (d,  $J = 9.3$  Hz, 1H), 6.28 – 6.18 (m, 2H), 6.17 – 6.10 (m, 2H), 5.33 (s, 1H), 5.20 (s, 1H), 4.23 (s, 1H), 3.74 (s, 3H), 3.21 (t,  $J = 6.4$  Hz, 2H), 2.81 (t,  $J = 6.3$  Hz, 2H).

$^{13}C$  NMR (101 MHz,  $CDCl_3$ )  $\delta$  162.18, 160.86, 149.48, 147.90, 140.22, 137.84, 130.00, 121.47, 115.28, 106.07, 106.06, 102.56, 98.81, 55.12, 40.84, 33.52.

HRMS (ESI):  $m/z$   $[M+H]^+$  calcd for  $[C_{16}H_{18}N_2O_2 + H]^+$ : 271.1441, found: 271.1438.

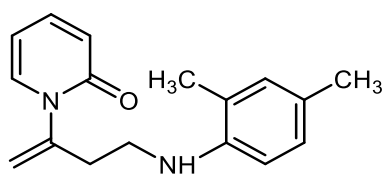

**1-(4-((2,4-Dimethylphenyl)amino)but-1-en-2-yl)pyridin-2(1H)-one (4ac):**

Yield: 92%

$^1\text{H}$  NMR (400 MHz,  $\text{CDCl}_3$ )  $\delta$  7.36 (ddd,  $J = 9.2, 6.6, 2.1$  Hz, 1H), 7.22 – 7.15 (m, 1H), 6.91 (d,  $J = 8.1$  Hz, 1H), 6.88 (s, 1H), 6.57 (d,  $J = 9.2$  Hz, 1H), 6.49 (d,  $J = 8.0$  Hz, 1H), 6.15 (td,  $J = 6.6, 1.3$  Hz, 1H), 5.33 (s, 1H), 5.21 (s, 1H), 3.89 (s, 1H), 3.26 (t,  $J = 6.4$  Hz, 2H), 2.86 (t,  $J = 6.4$  Hz, 2H), 2.23 (s, 3H), 2.14 (s, 3H).

$^{13}\text{C}$  NMR (101 MHz,  $\text{CDCl}_3$ )  $\delta$  162.22, 148.15, 143.65, 140.16, 137.84, 131.07, 127.29, 126.05, 122.51, 121.53, 115.13, 109.80, 105.99, 40.97, 33.67, 20.40, 17.48.

HRMS (ESI):  $m/z$   $[\text{M}+\text{H}^+]$  calcd for  $[\text{C}_{17}\text{H}_{20}\text{N}_2\text{O} + \text{H}]^+$ : 269.1648, found: 269.1649.

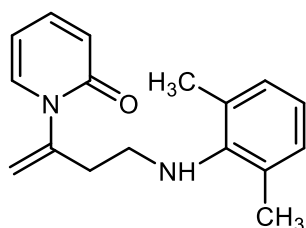

**1-(4-((2,6-Dimethylphenyl)amino)but-1-en-2-yl)pyridin-2(1H)-one (4ad):**

Yield: 89%

$^1\text{H}$  NMR (400 MHz,  $\text{CDCl}_3$ )  $\delta$  7.35 (ddd,  $J = 9.2, 6.6, 2.1$  Hz, 1H), 7.18 (ddd,  $J = 6.8, 2.1, 0.7$  Hz, 1H), 6.96 (d,  $J = 7.4$  Hz, 2H), 6.79 (t,  $J = 7.4$  Hz, 1H), 6.56 (d,  $J = 9.3$  Hz, 1H), 6.15 (td,  $J = 6.6, 1.3$  Hz, 1H), 5.33 (s, 1H), 5.19 (s, 1H), 3.12 (t,  $J = 6.7$  Hz, 2H), 2.81 (t,  $J = 6.8$  Hz, 2H), 2.25 (s, 6H).

$^{13}\text{C}$  NMR (101 MHz,  $\text{CDCl}_3$ )  $\delta$  162.13, 148.66, 145.87, 140.10, 137.97, 129.04, 128.94, 121.71, 121.55, 114.70, 105.89, 45.22, 35.40, 18.79.

HRMS (ESI):  $m/z$   $[\text{M}+\text{H}^+]$  calcd for  $[\text{C}_{17}\text{H}_{20}\text{N}_2\text{O} + \text{H}]^+$ : 269.1648, found: 269.1646.

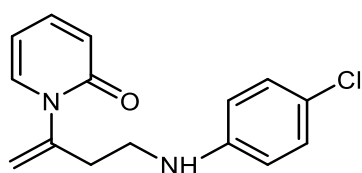

**1-(4-((4-Chlorophenyl)amino)but-1-en-2-yl)pyridin-2(1H)-one (4ae):**

Yield: 90%

$^1\text{H}$  NMR (400 MHz,  $\text{CDCl}_3$ )  $\delta$  7.35 (ddd,  $J = 9.3, 6.6, 2.1$  Hz, 1H), 7.16 (dd,  $J = 6.8, 2.1$  Hz, 1H), 7.07 (d,  $J = 8.9$  Hz, 2H), 6.55 (d,  $J = 9.9$  Hz, 1H), 6.50 (d,  $J = 9.0$  Hz, 2H), 6.15 (td,  $J = 6.7, 1.3$  Hz, 1H), 5.32 (s, 1H), 5.21 (s, 1H), 4.42 (s, 1H), 3.20 (t,  $J = 6.3$  Hz, 2H), 2.78 (t,  $J = 6.3$  Hz, 2H).

$^{13}\text{C}$  NMR (101 MHz,  $\text{CDCl}_3$ )  $\delta$  162.24, 147.63, 146.72, 140.29, 137.71, 129.08, 121.74, 121.52, 115.50, 113.99, 106.16, 41.04, 33.47.

HRMS (ESI):  $m/z$   $[\text{M}+\text{H}^+]$  calcd for  $[\text{C}_{15}\text{H}_{15}\text{ClN}_2\text{O} + \text{H}]^+$ : 275.0946, found: 275.0945.

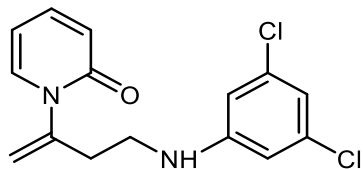

**1-(4-((3,5-Dichlorophenyl)amino)but-1-en-2-yl)pyridin-2(1H)-one (4af):**

Yield: 89%

$^1\text{H}$  NMR (400 MHz,  $\text{CDCl}_3$ )  $\delta$  7.37 (ddd,  $J = 9.2, 6.6, 2.1$  Hz, 1H), 7.17 (dd,  $J = 6.8, 2.1$  Hz, 1H), 6.59 (t,  $J = 1.8$  Hz, 1H), 6.55 (d,  $J = 8.7$  Hz, 1H), 6.43 (d,  $J = 1.9$  Hz, 2H), 6.19 (td,  $J = 6.7, 1.3$  Hz, 1H), 5.34 (s, 1H), 5.23 (s, 1H), 5.04 (s, 1H), 3.21 (t,  $J = 6.3$  Hz, 2H), 2.75 (t,  $J = 6.2$  Hz, 2H).

$^{13}\text{C}$  NMR (101 MHz,  $\text{CDCl}_3$ )  $\delta$  162.32, 149.88, 147.31, 140.48, 137.62, 135.44, 121.49, 116.58, 115.70, 110.84, 106.43, 40.84, 33.22.

HRMS (ESI):  $m/z$   $[\text{M}+\text{H}^+]$  calcd for  $[\text{C}_{15}\text{H}_{14}\text{Cl}_2\text{N}_2\text{O} + \text{H}]^+$ : 309.0556, found: 309.0555.

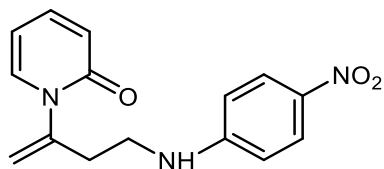

**1-(4-((4-Nitrophenyl)amino)but-1-en-2-yl)pyridin-2(1H)-one (4ag):**

Yield: 51%

$^1\text{H}$  NMR (400 MHz,  $\text{CDCl}_3$ )  $\delta$  8.04 (d,  $J = 9.2$  Hz, 2H), 7.41 (ddd,  $J = 9.2, 6.6, 2.1$  Hz, 1H), 7.22 (ddd,  $J = 6.8, 2.1, 0.8$  Hz, 1H), 6.57 (d,  $J = 9.3$  Hz, 1H), 6.53 (d,  $J = 9.3$  Hz, 2H), 6.31 (t,  $J = 5.3$  Hz, 1H), 6.23 (td,  $J = 6.7, 1.3$  Hz, 1H), 5.37 (s, 1H), 5.28 (s, 1H), 3.39 (q,  $J = 6.0$  Hz, 2H), 2.77 (t,  $J = 6.2$  Hz, 2H).

$^{13}\text{C}$  NMR (101 MHz,  $\text{CDCl}_3$ )  $\delta$  162.50, 153.65, 147.10, 140.79, 137.61, 137.53, 126.57, 121.45, 115.85, 110.99, 106.77, 41.04, 32.95.

HRMS (ESI):  $m/z$   $[\text{M}+\text{H}^+]$  calcd for  $[\text{C}_{15}\text{H}_{15}\text{N}_3\text{O}_3 + \text{H}]^+$ : 286.1186, found: 286.1187.

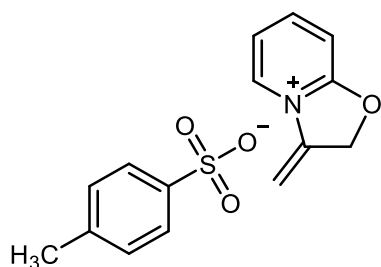

**3-Methylidene-2,3-dihydro[1,3]oxazolo[3,2-a]pyridin-4-ium *p*-toluenesulfonate:**

$^1\text{H}$  NMR (400 MHz,  $\text{CD}_3\text{OD}$ )  $\delta$  8.93 (d,  $J = 6.4$  Hz, 1H), 8.52 – 8.43 (m, 1H), 7.69 (d,  $J = 8.2$  Hz, 2H), 7.65 – 7.56 (m, 2H), 7.23 (d,  $J = 7.9$  Hz, 2H), 6.12 (dt,  $J = 4.6, 3.2$  Hz, 1H), 5.70 (t,  $J = 3.0$  Hz, 2H), 5.59 (dt,  $J = 5.3, 2.8$  Hz, 1H), 2.37 (s, 3H).

$^{13}\text{C}$  NMR (101 MHz,  $\text{CD}_3\text{OD}$ )  $\delta$  163.89, 151.06, 143.66, 141.63, 139.76, 132.70, 129.80, 126.94, 120.62, 112.78, 99.79, 74.94, 21.29.

**Compounds 1a-g and 2a-g:** The synthesis and characterization of these compounds are described in A. O. Karatavuk, *Org. Biomol. Chem.* **2021**, *19*, 10617-10621.

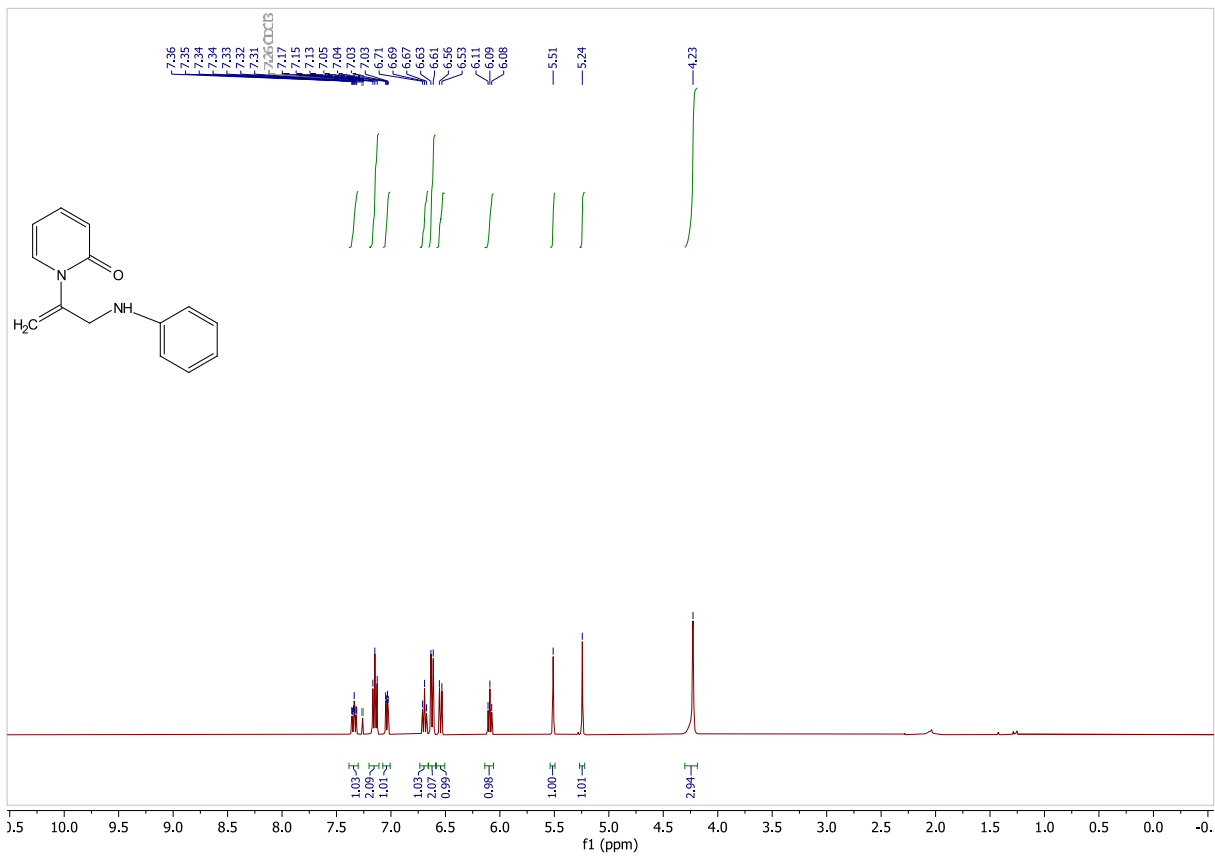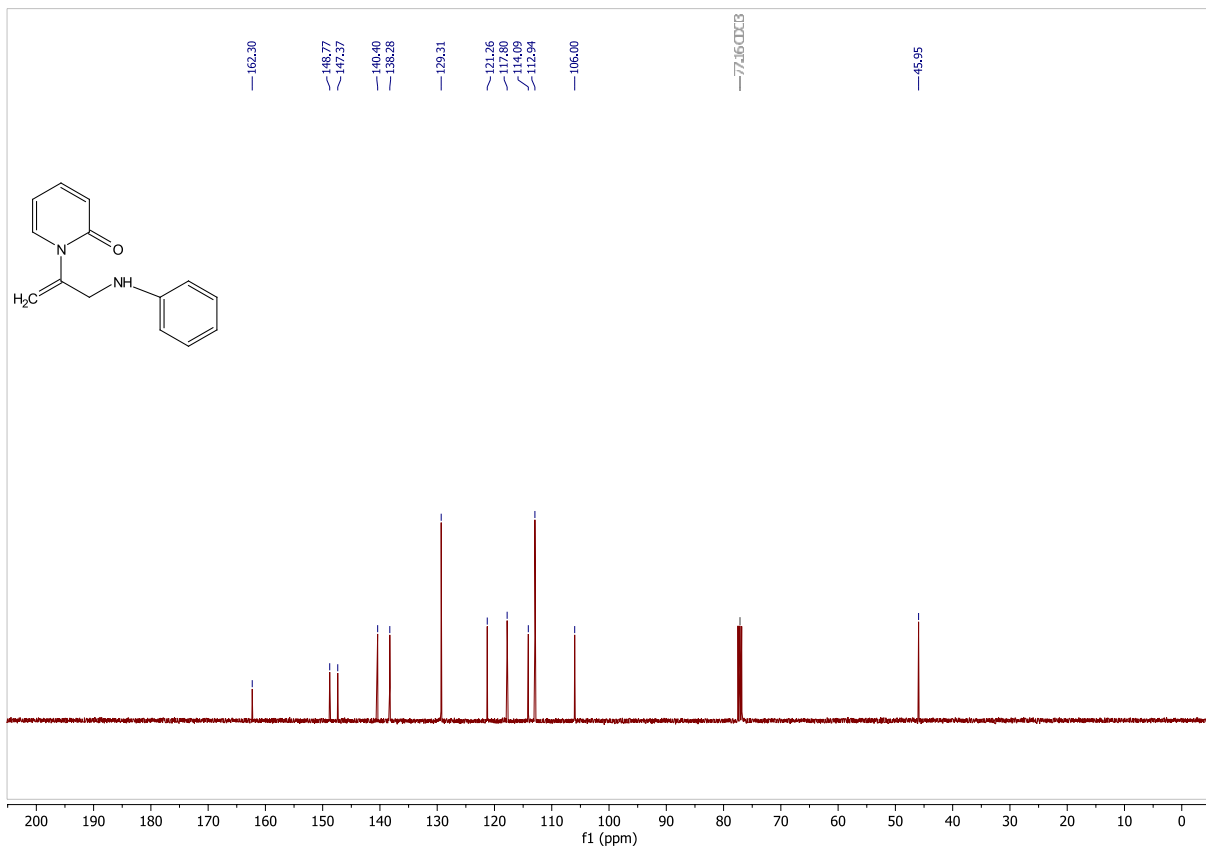

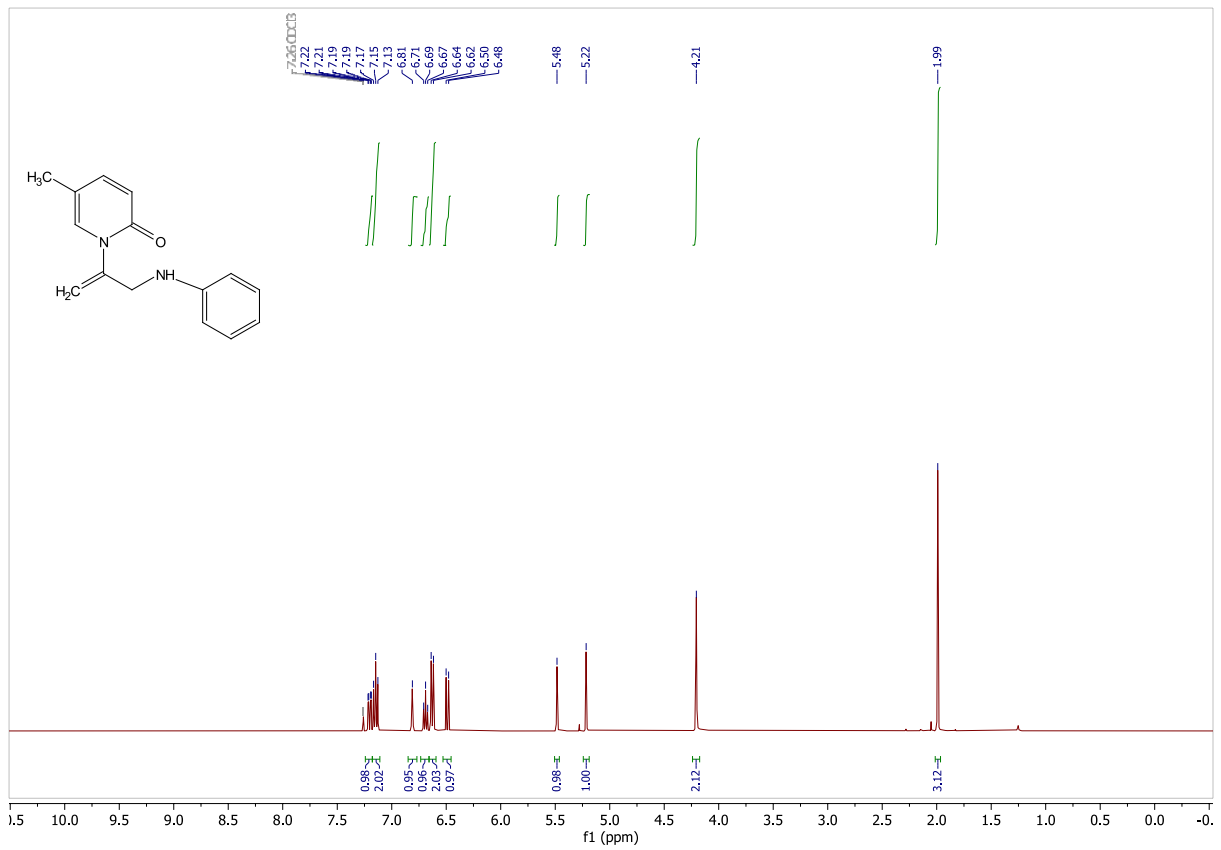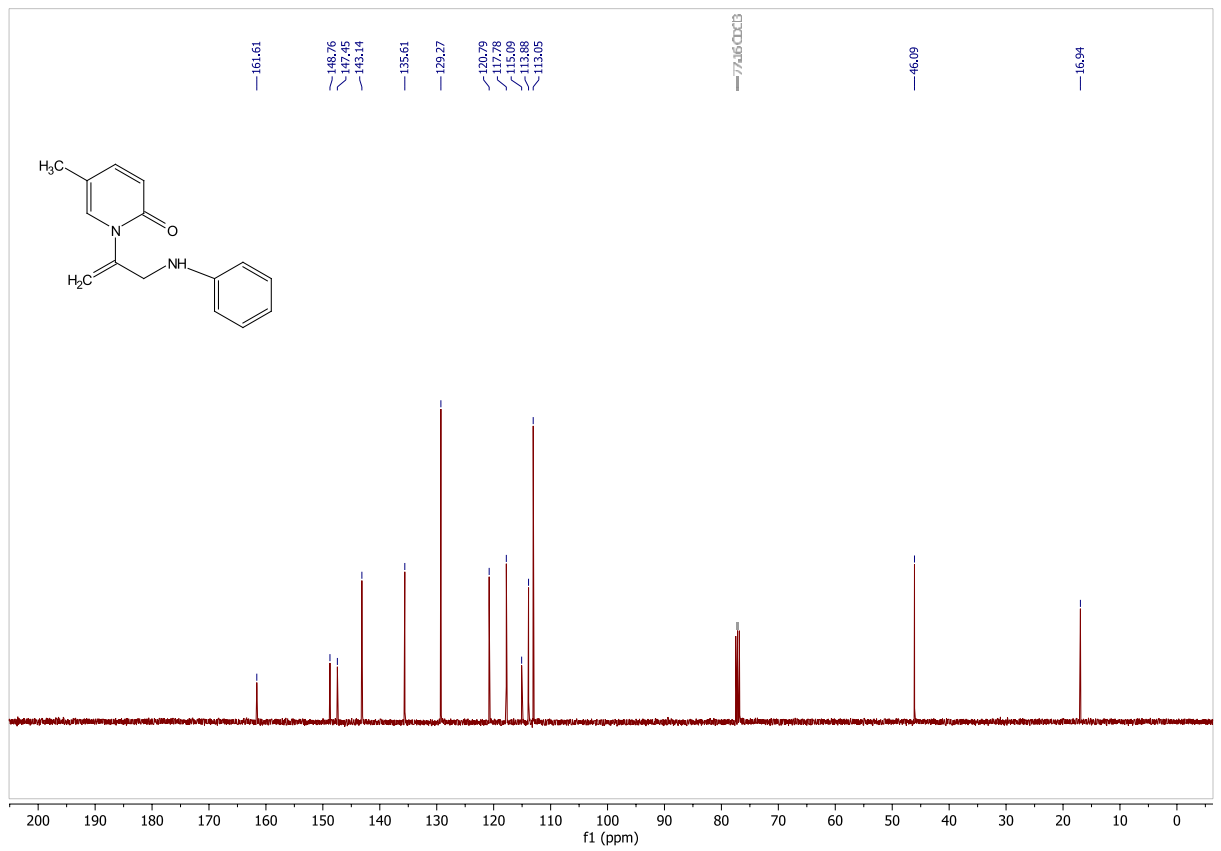



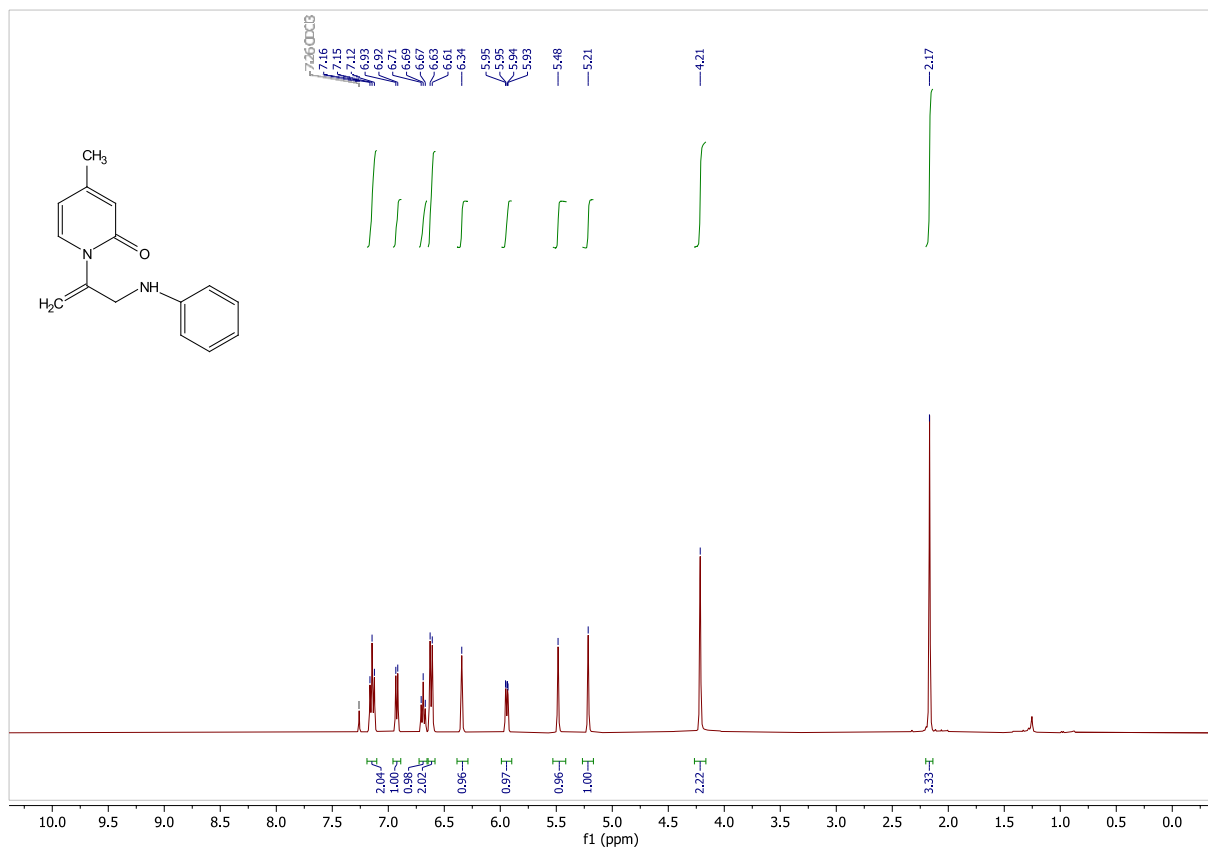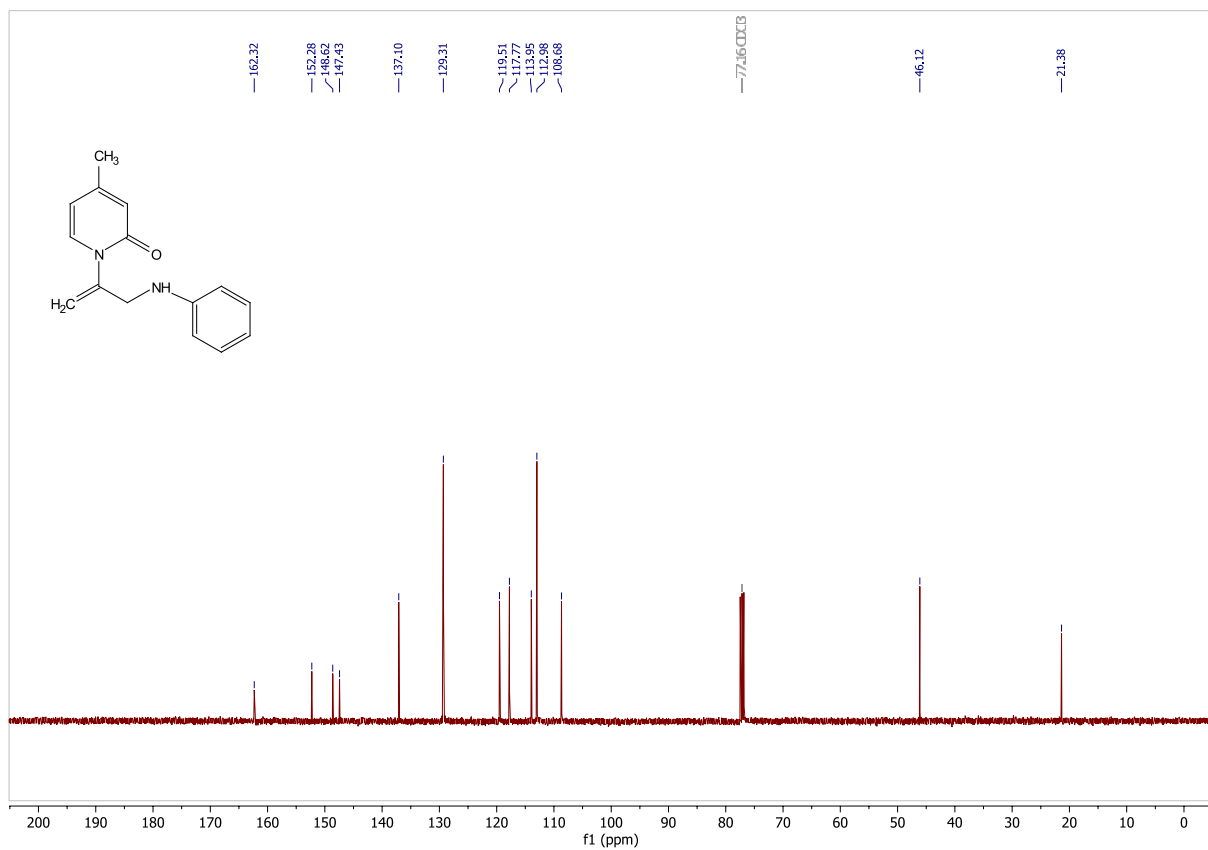

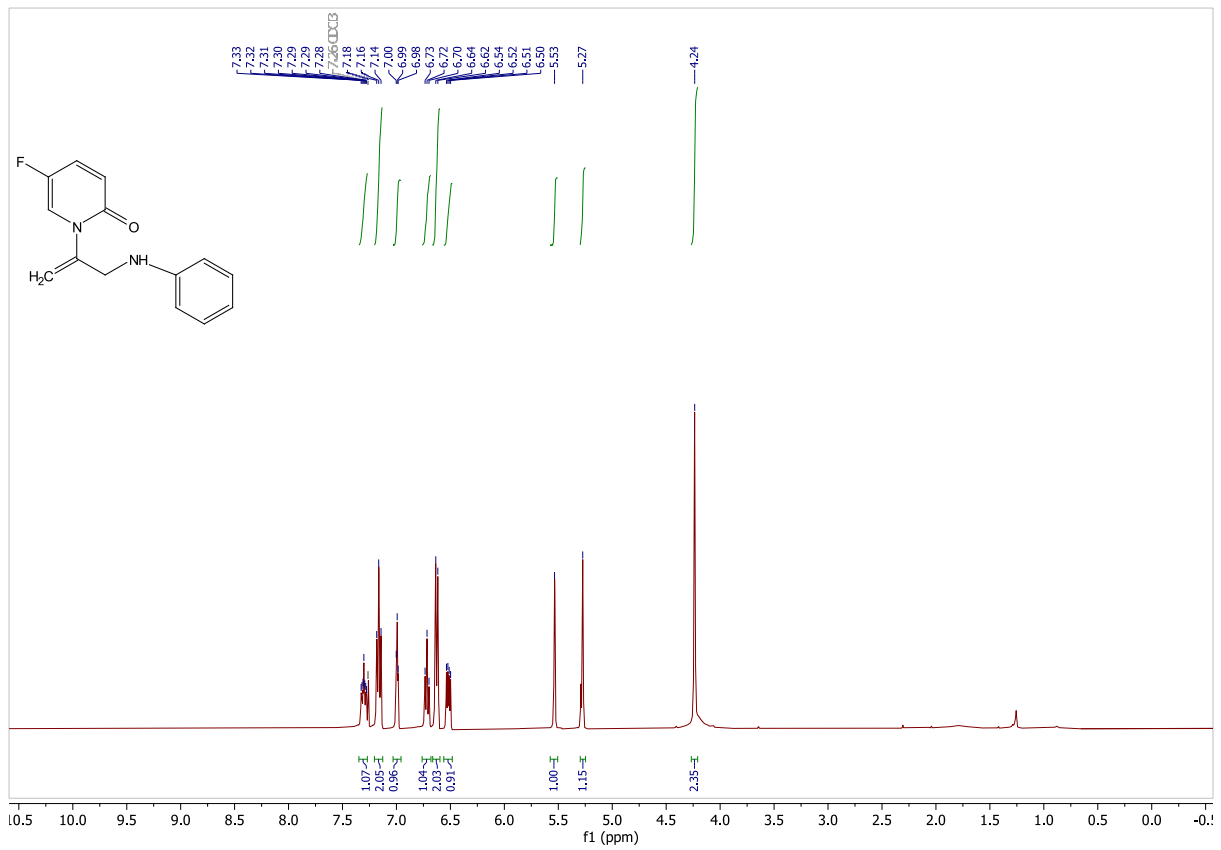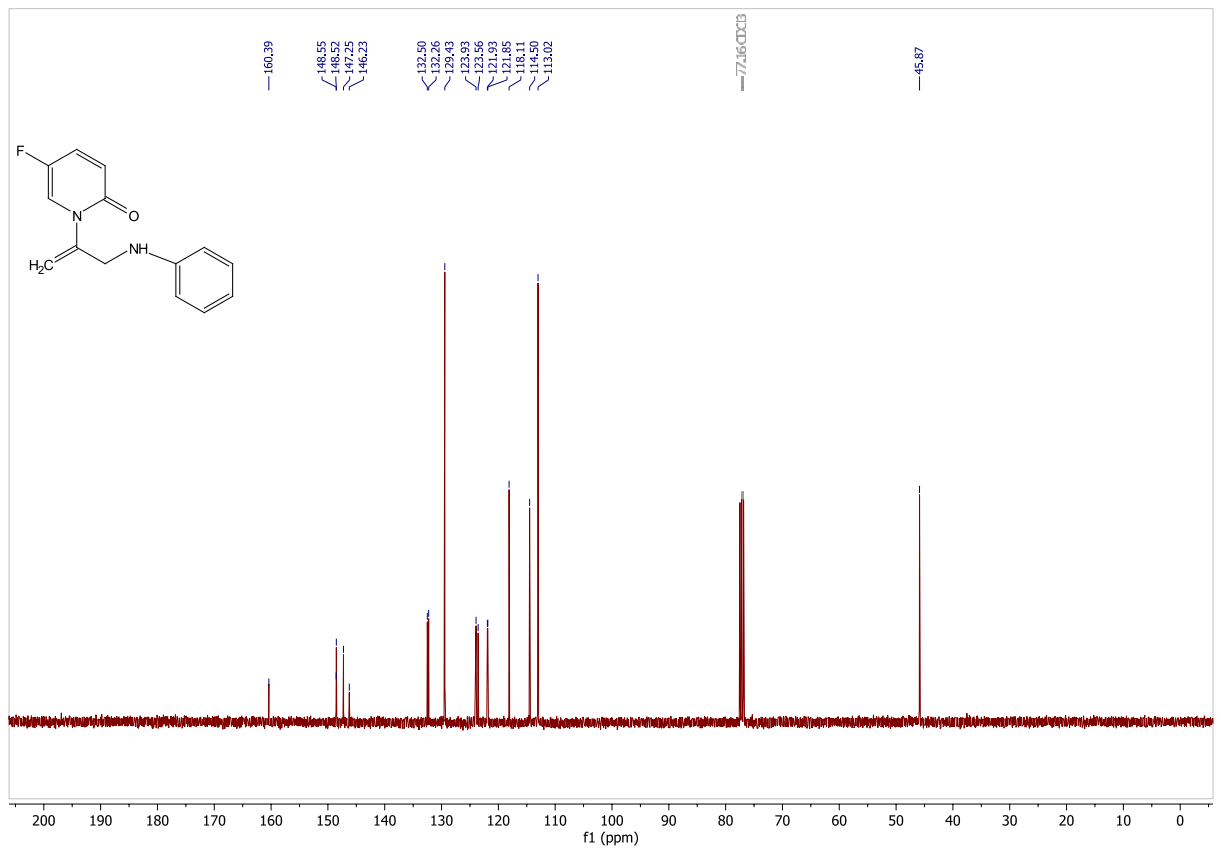

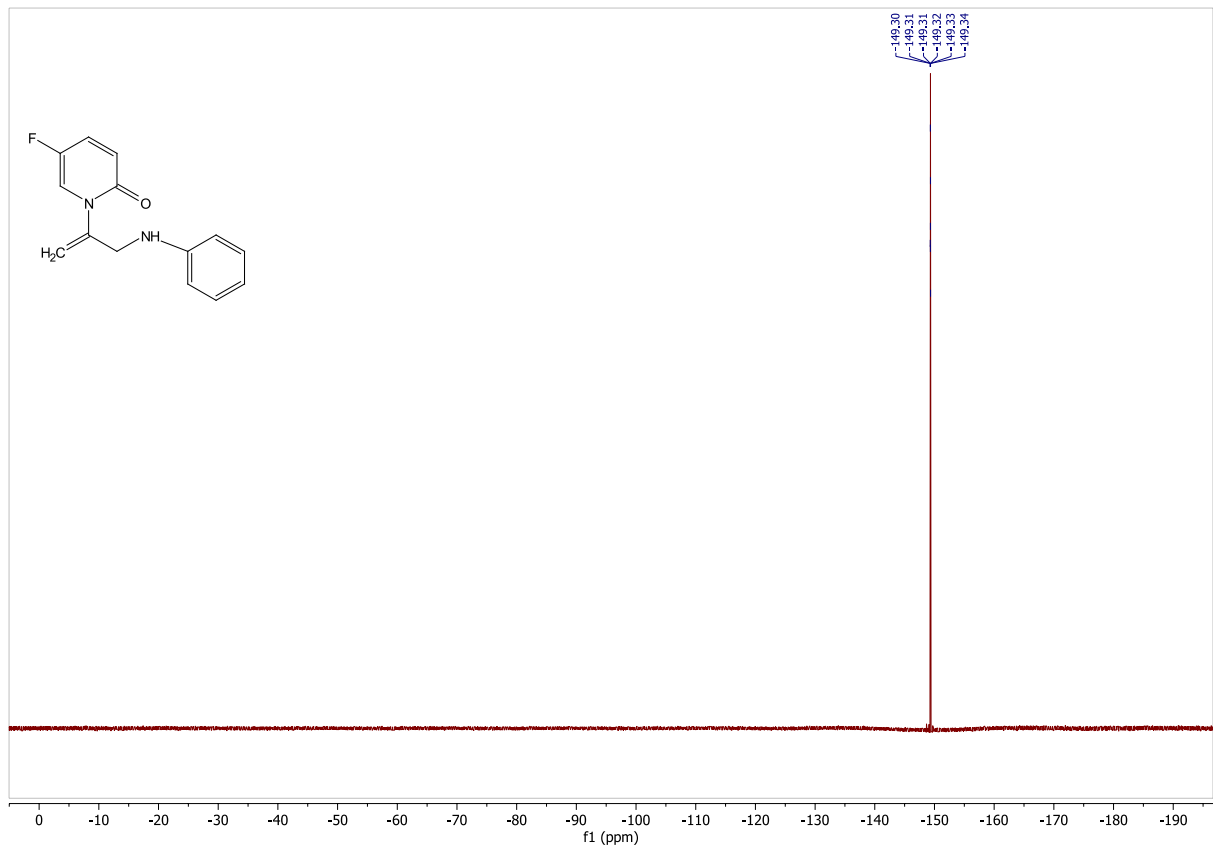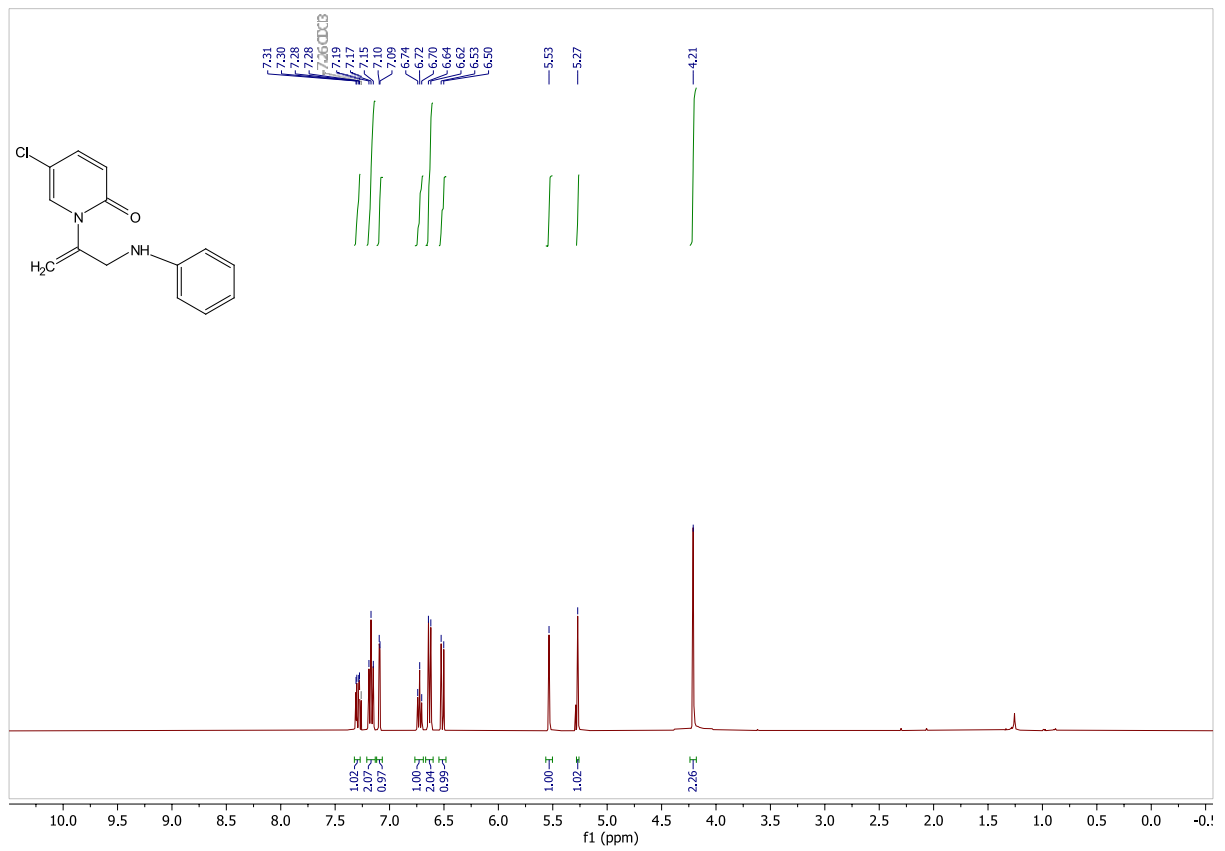

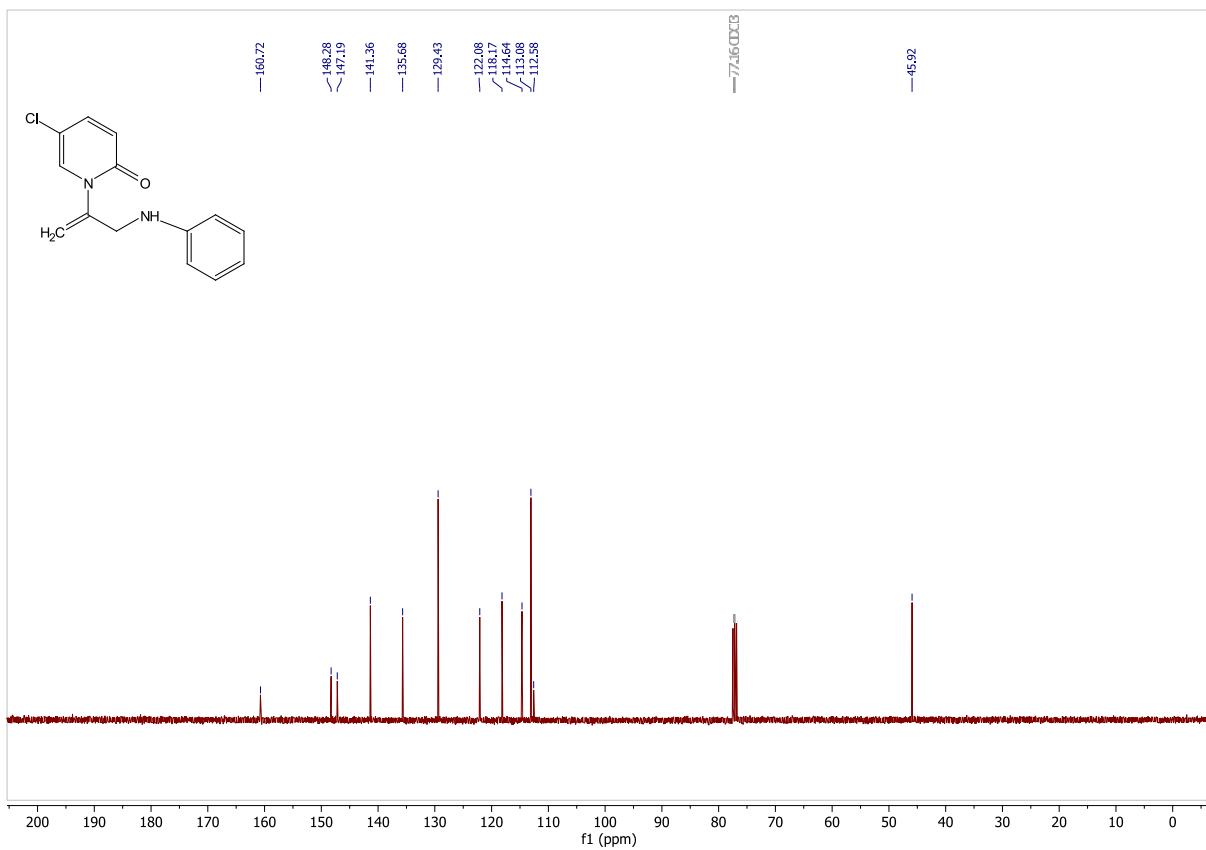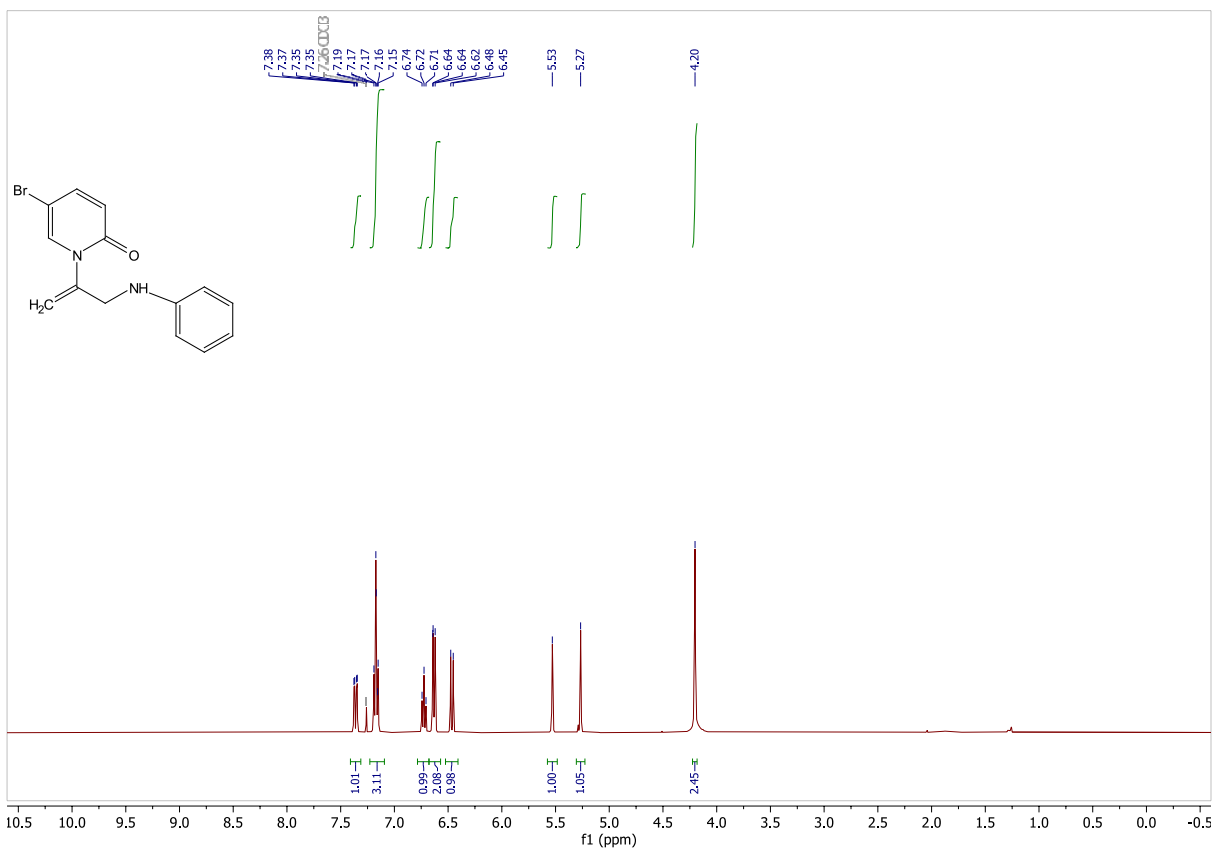

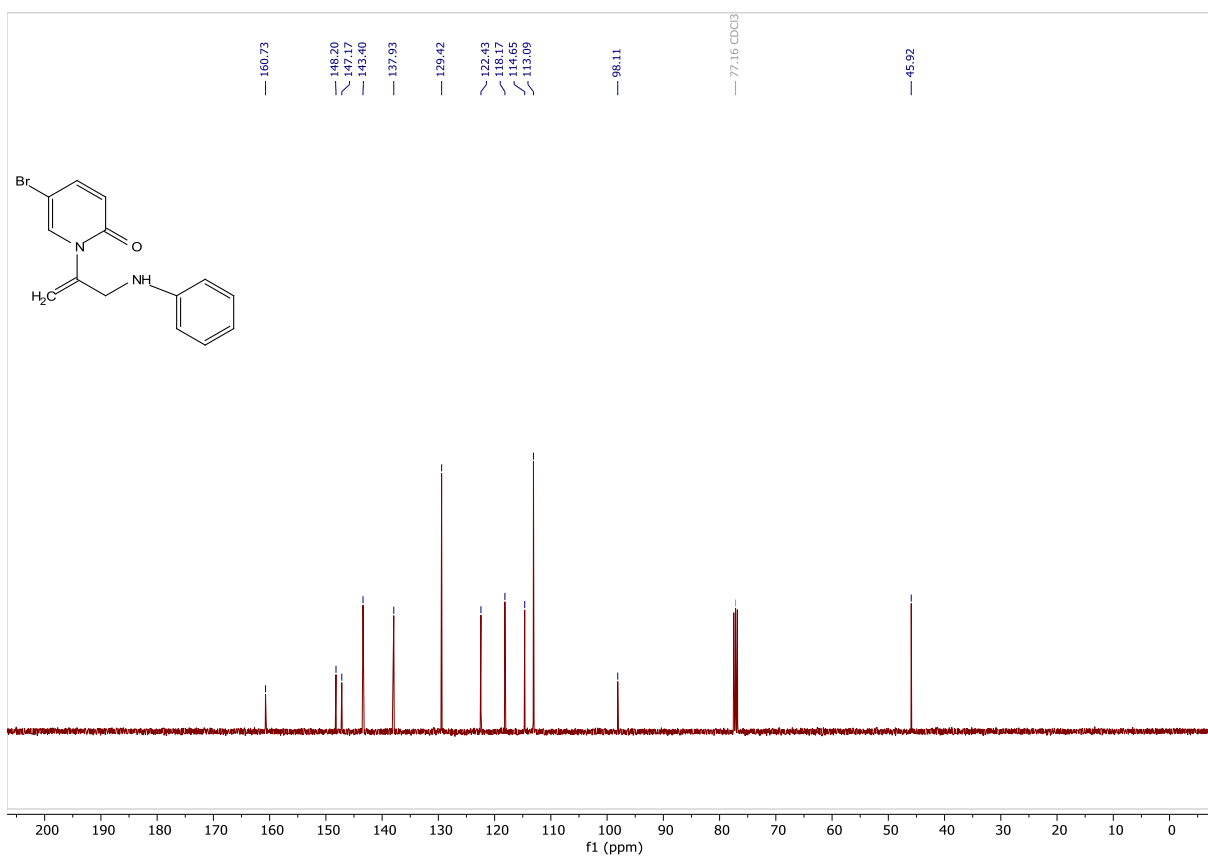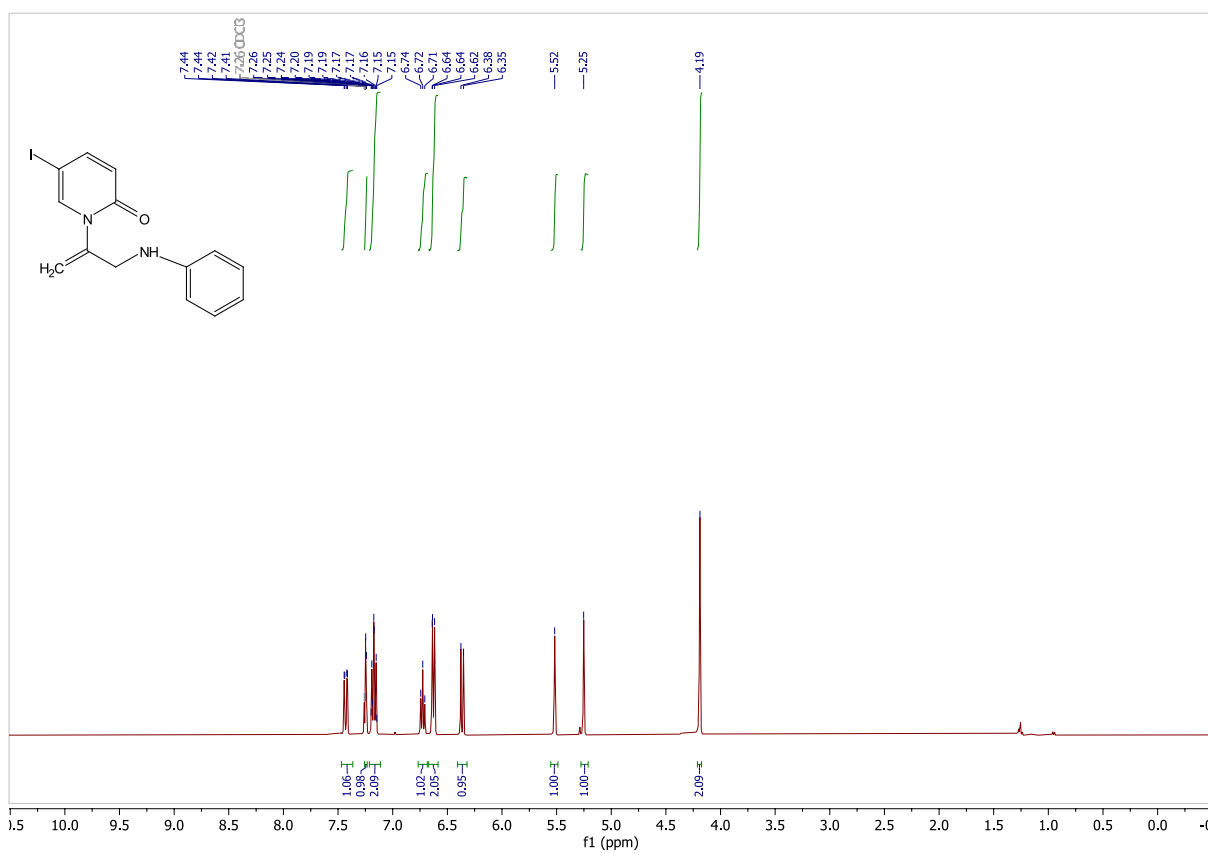

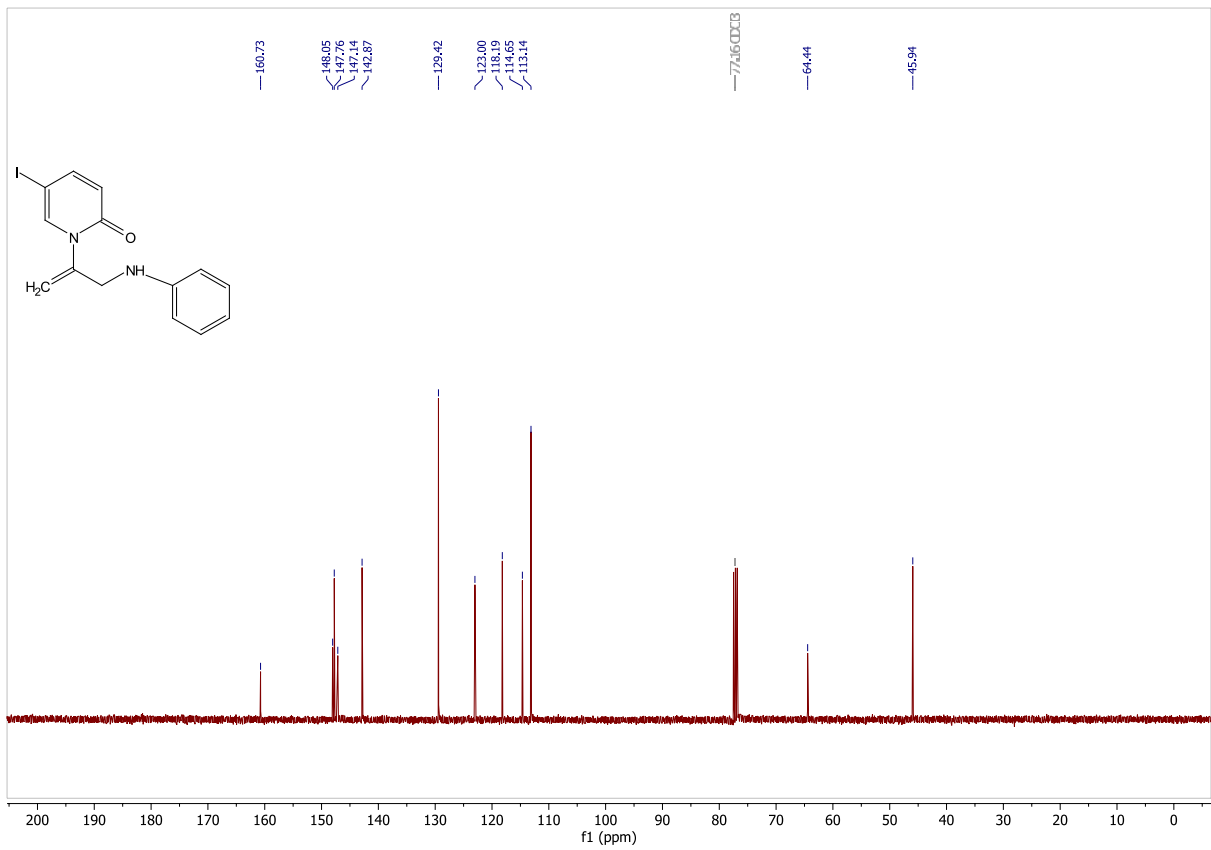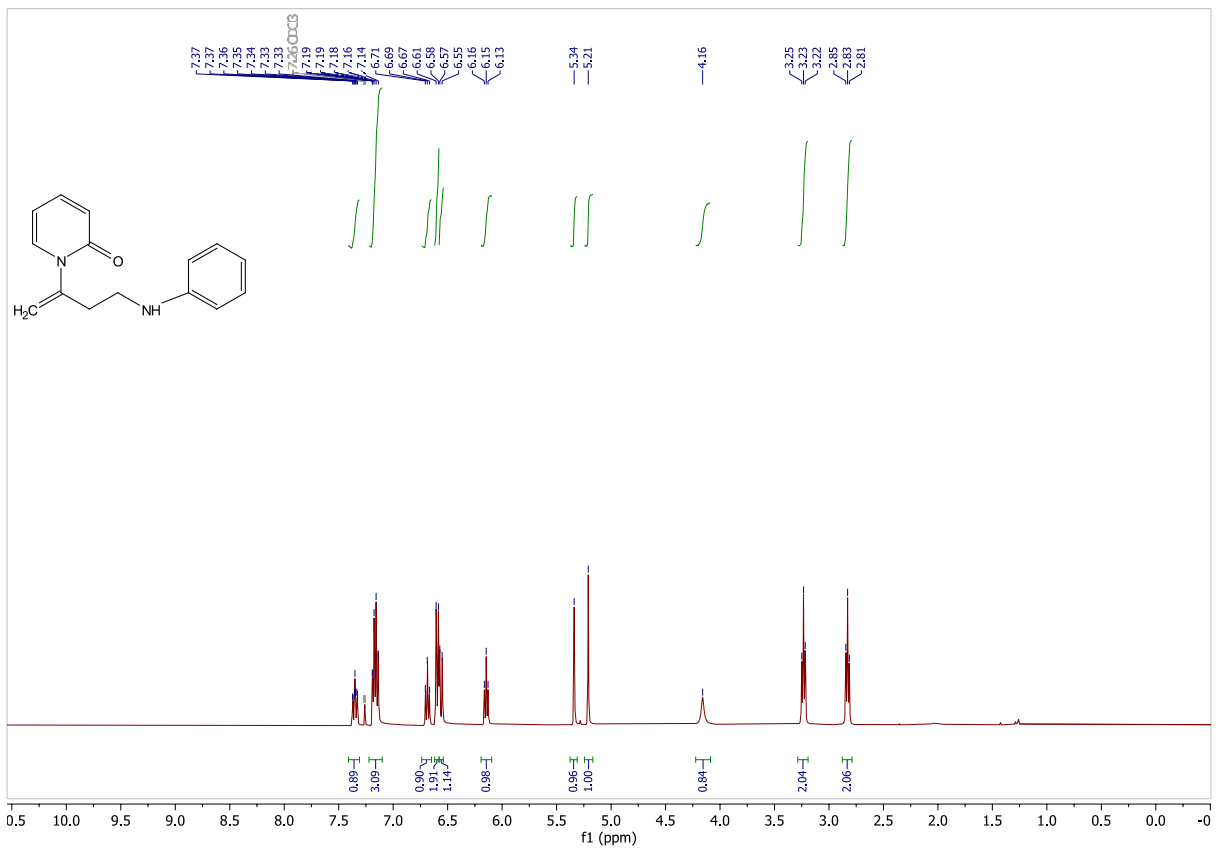

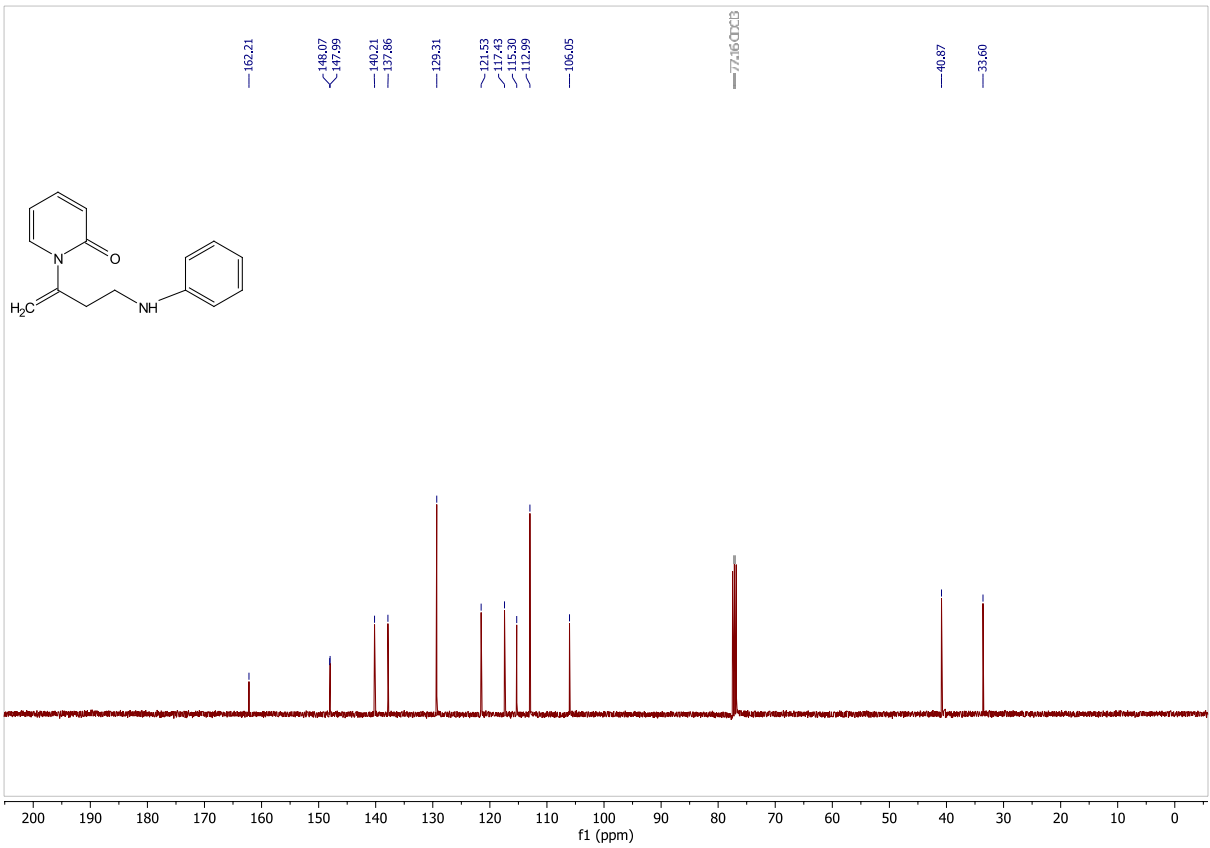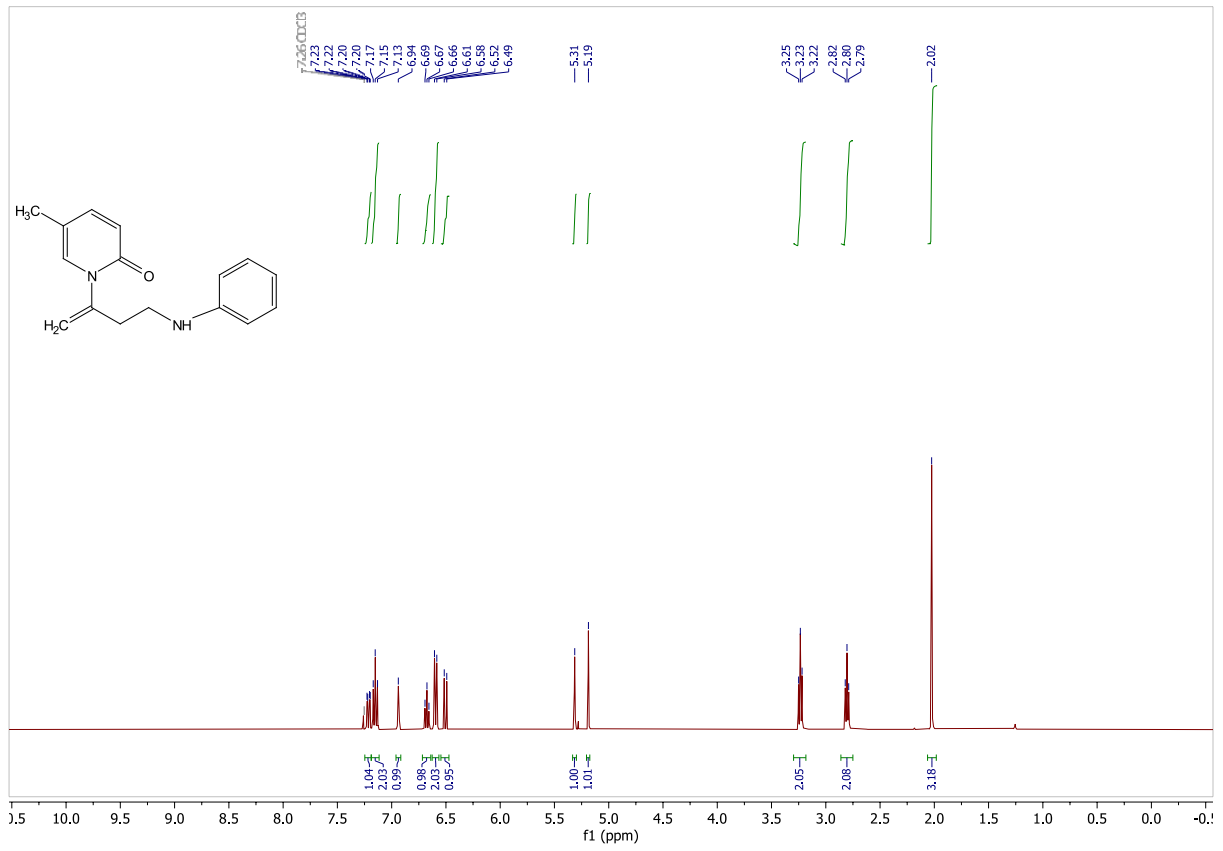

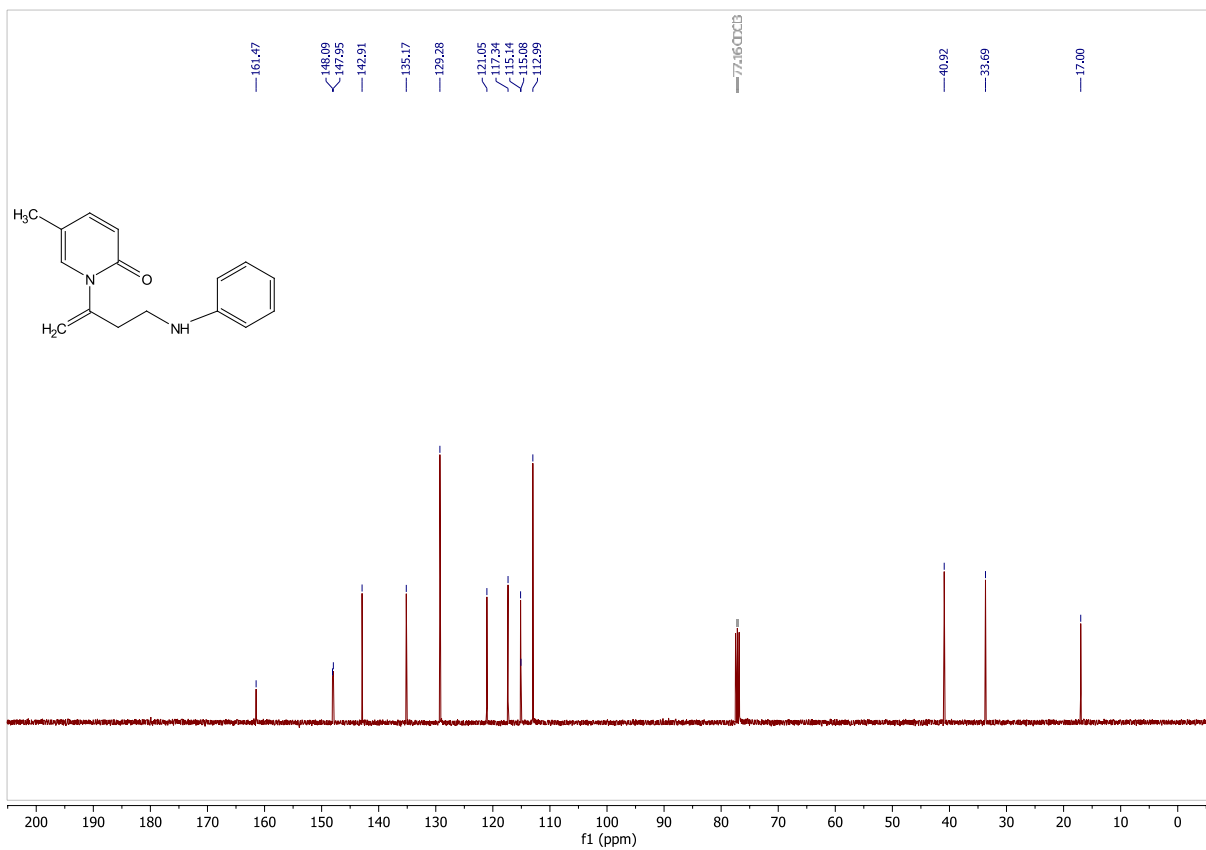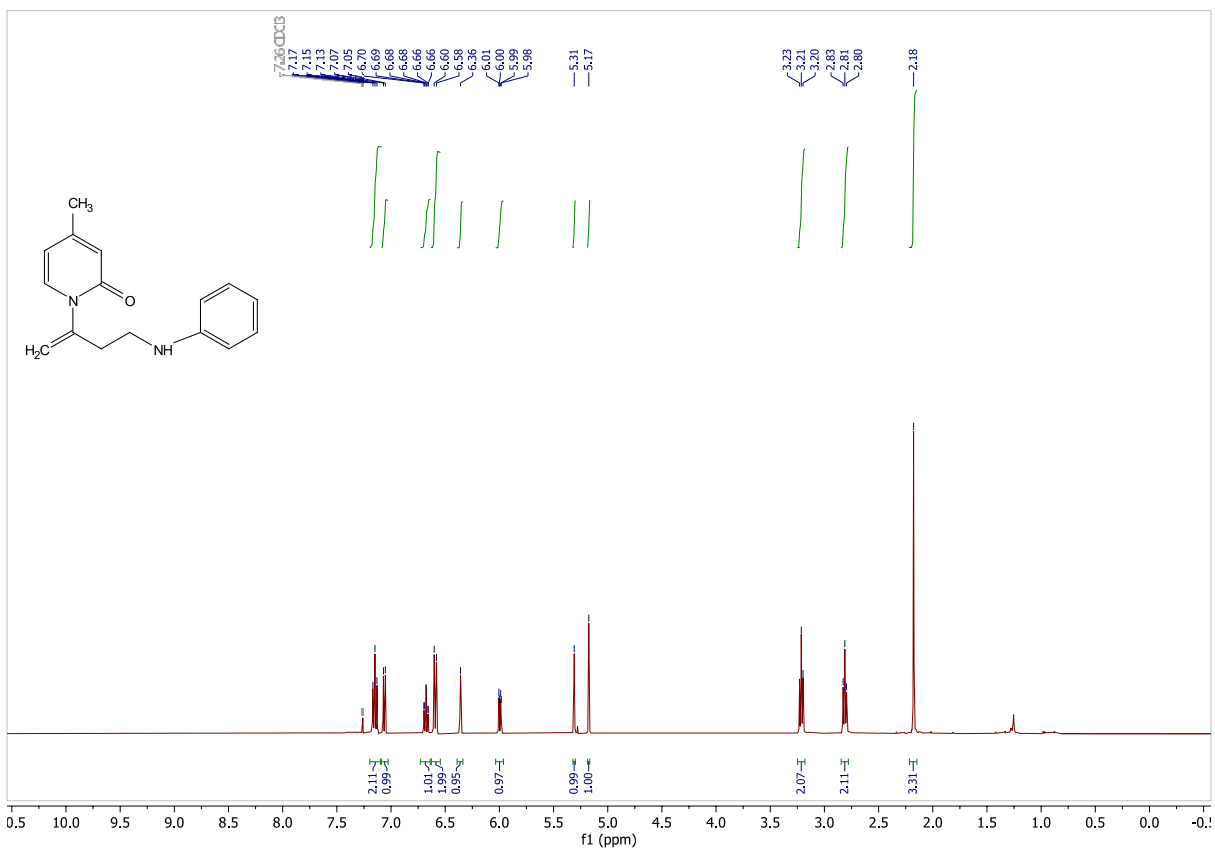



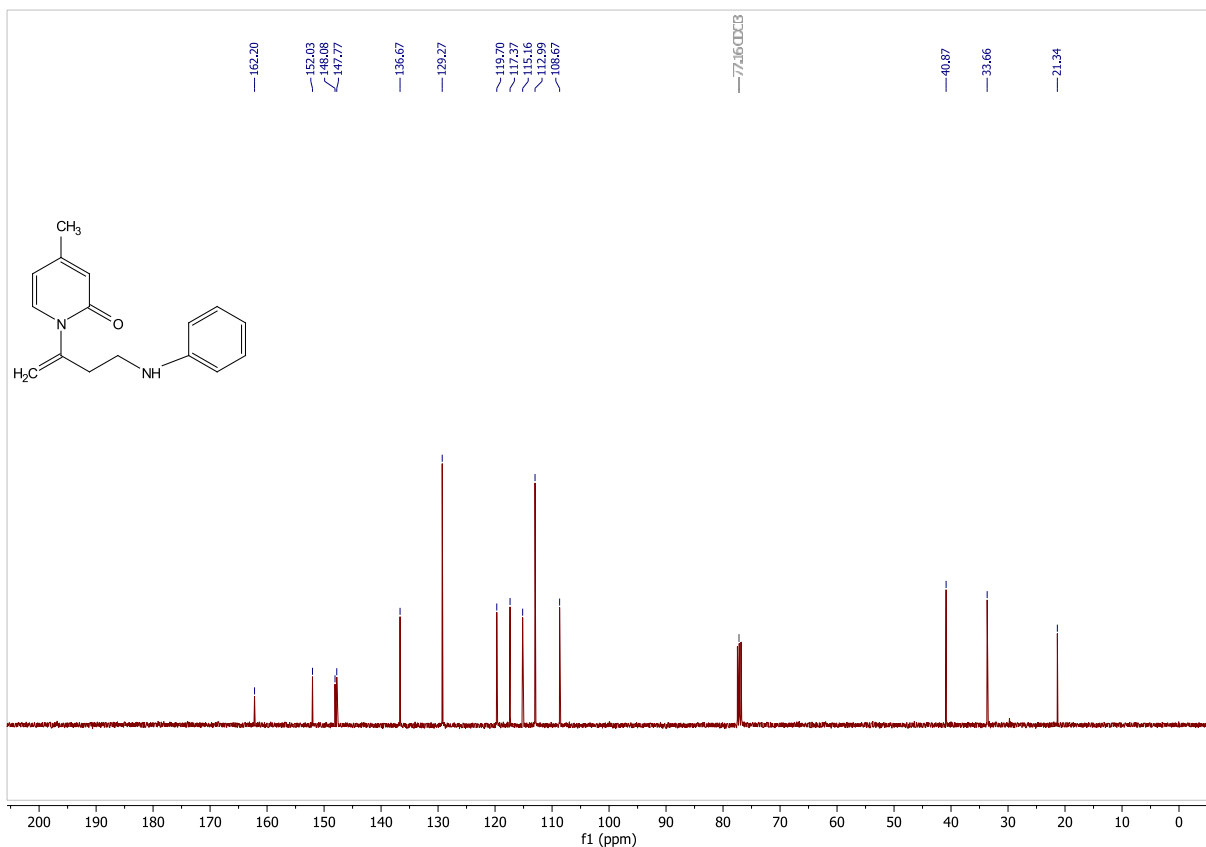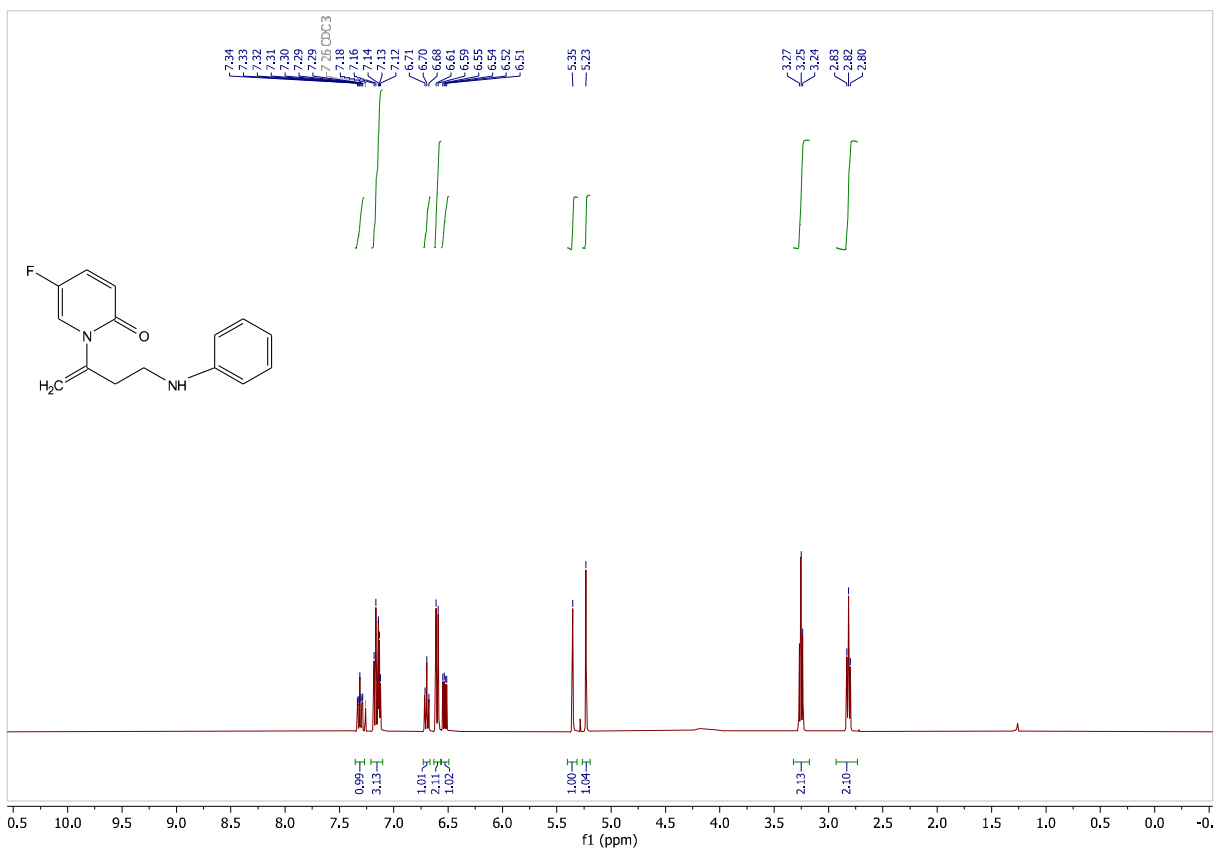

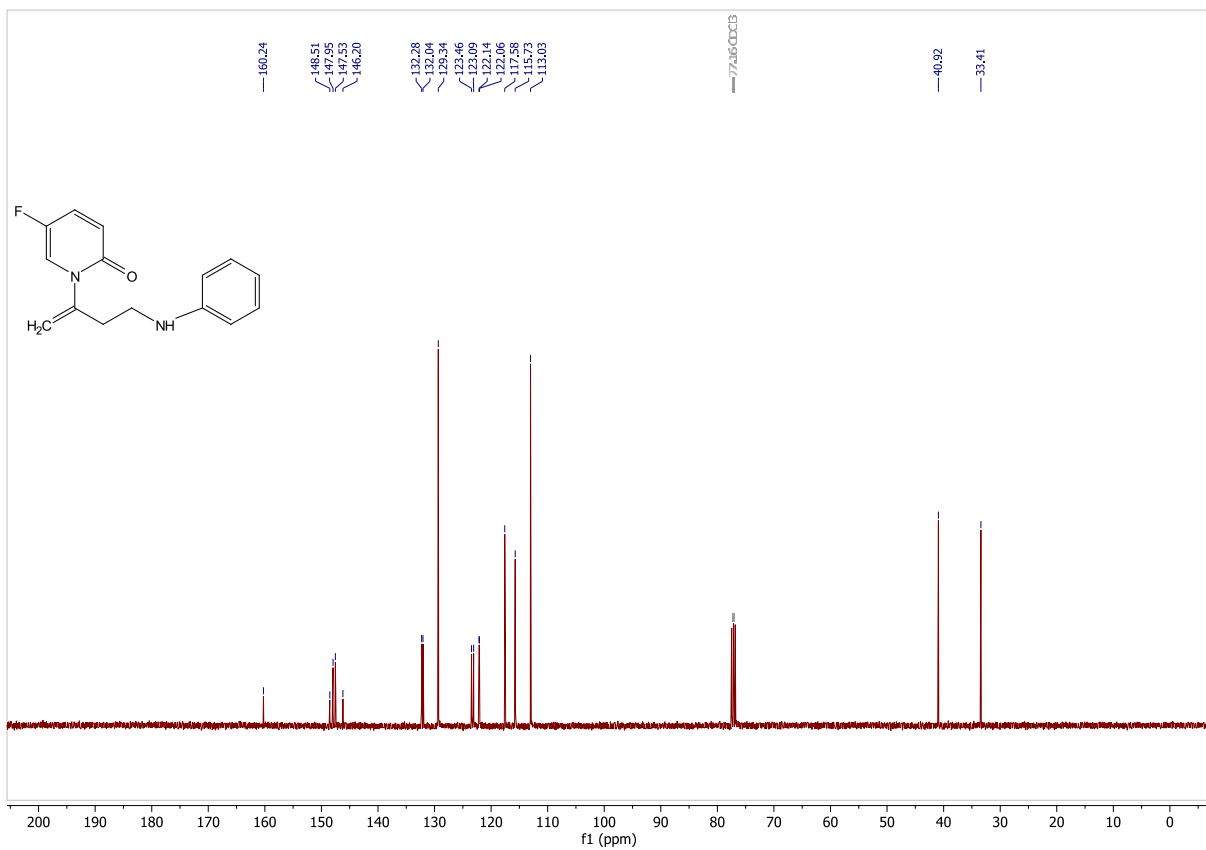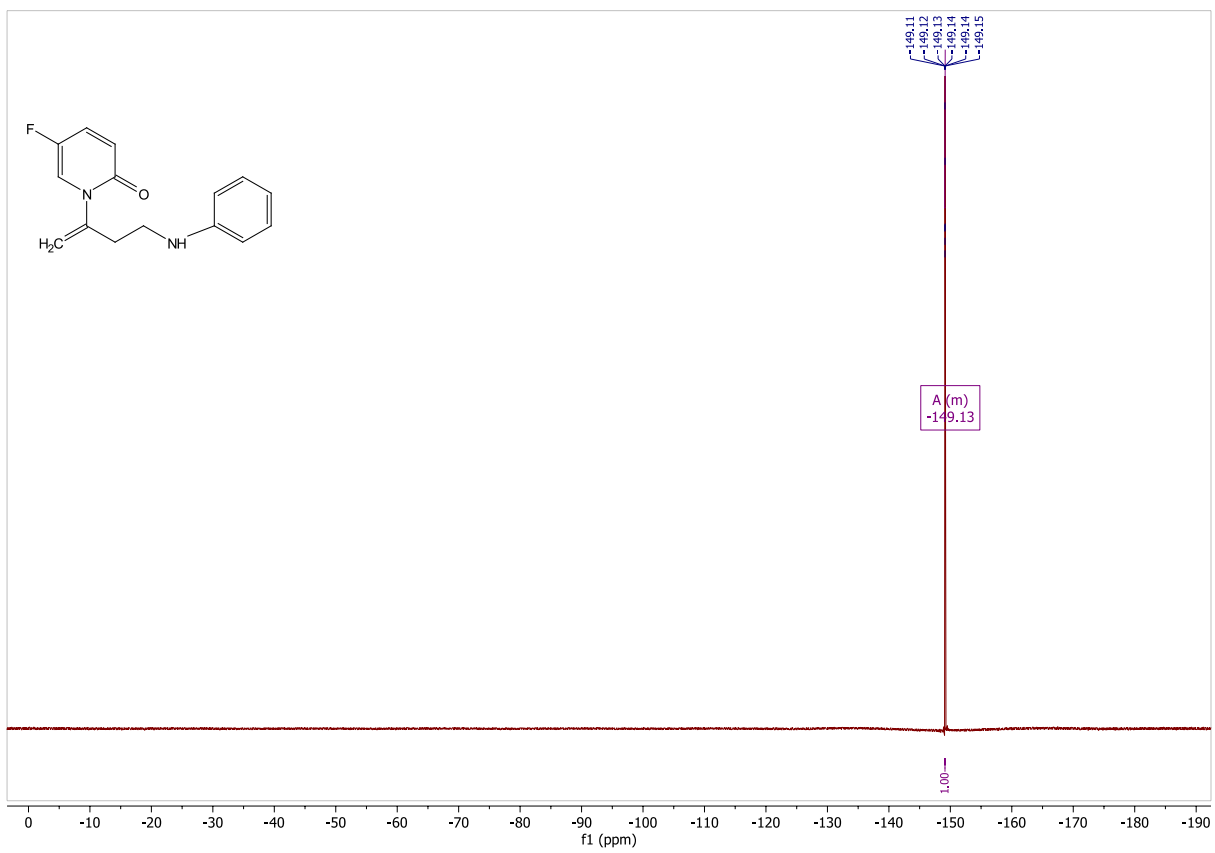

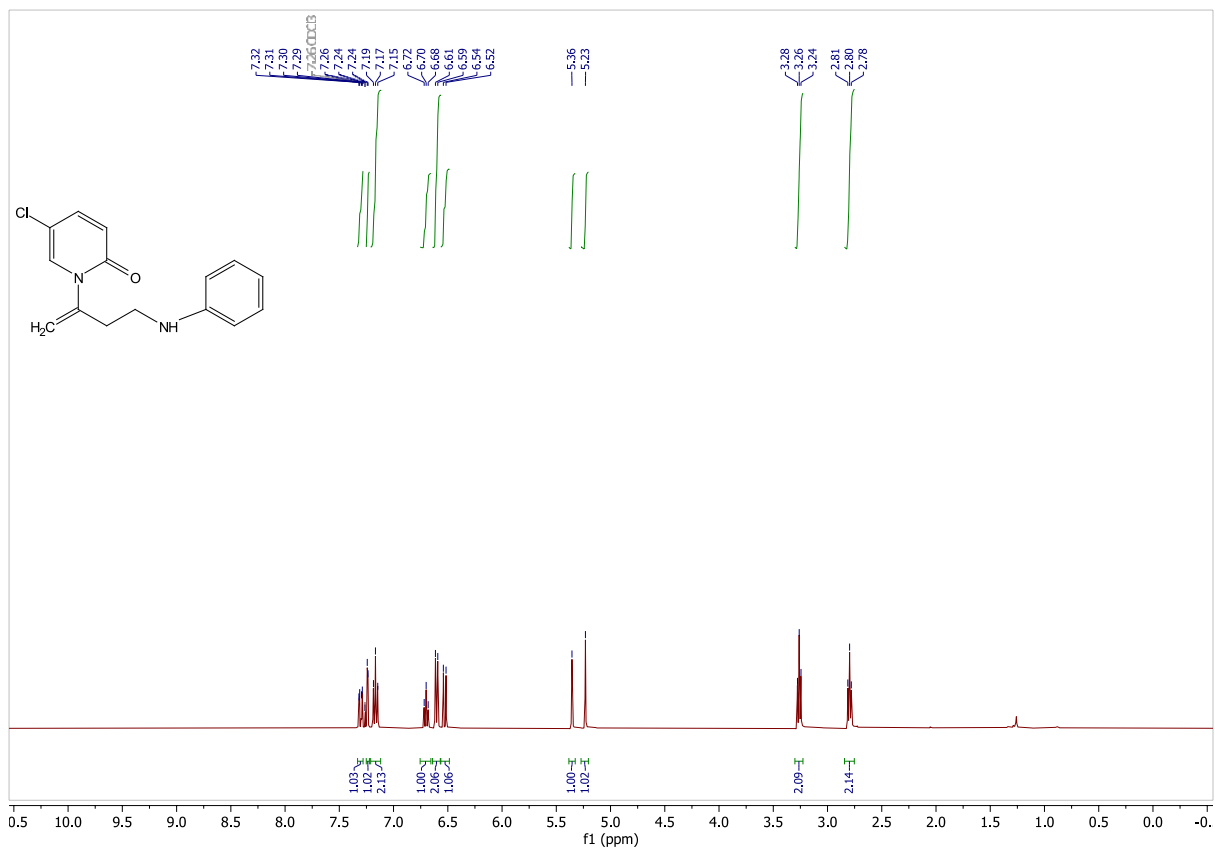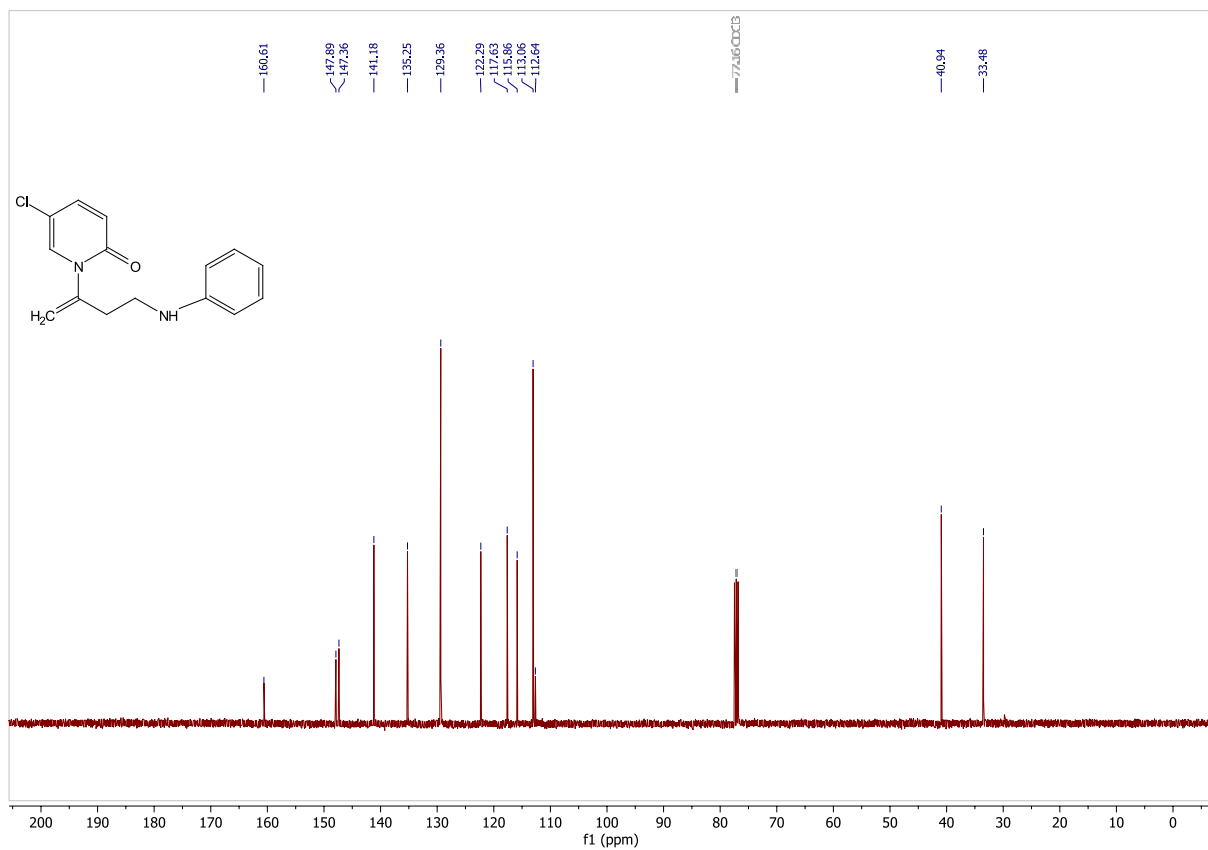

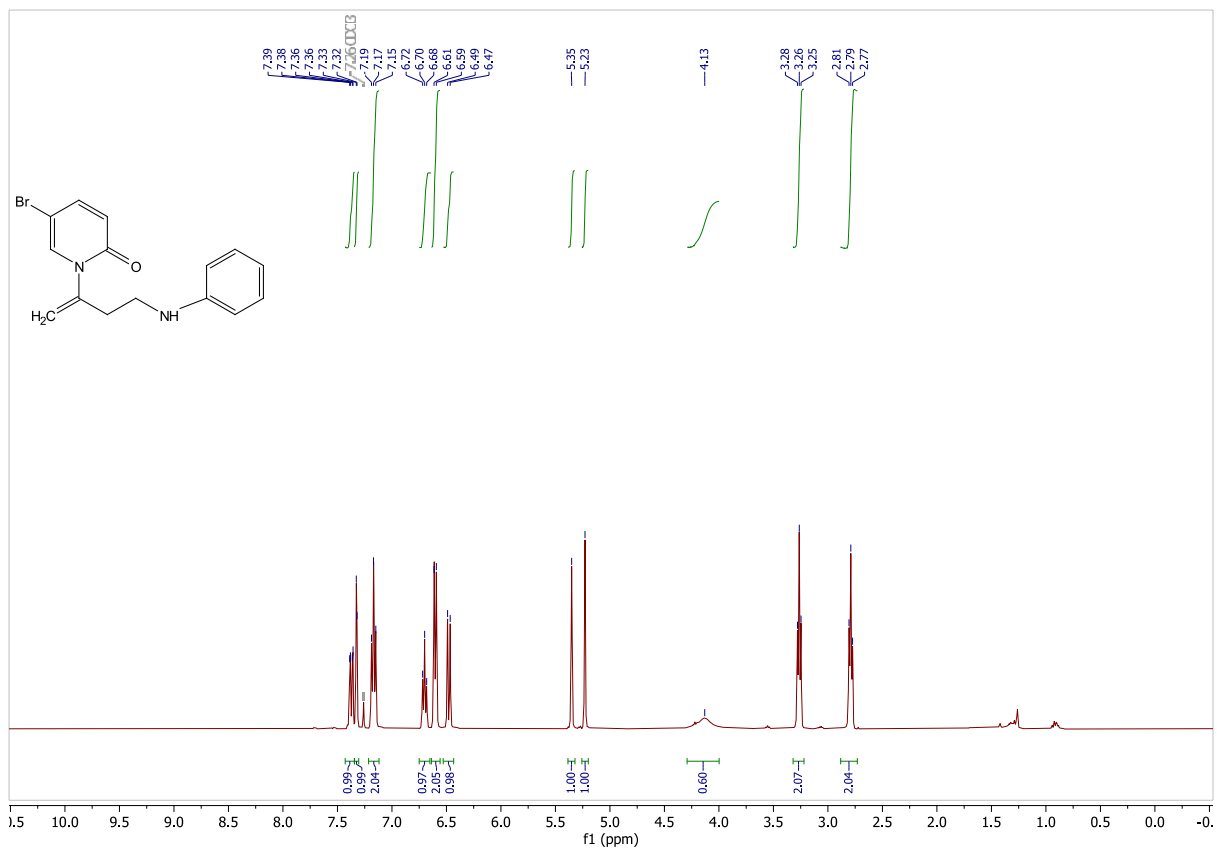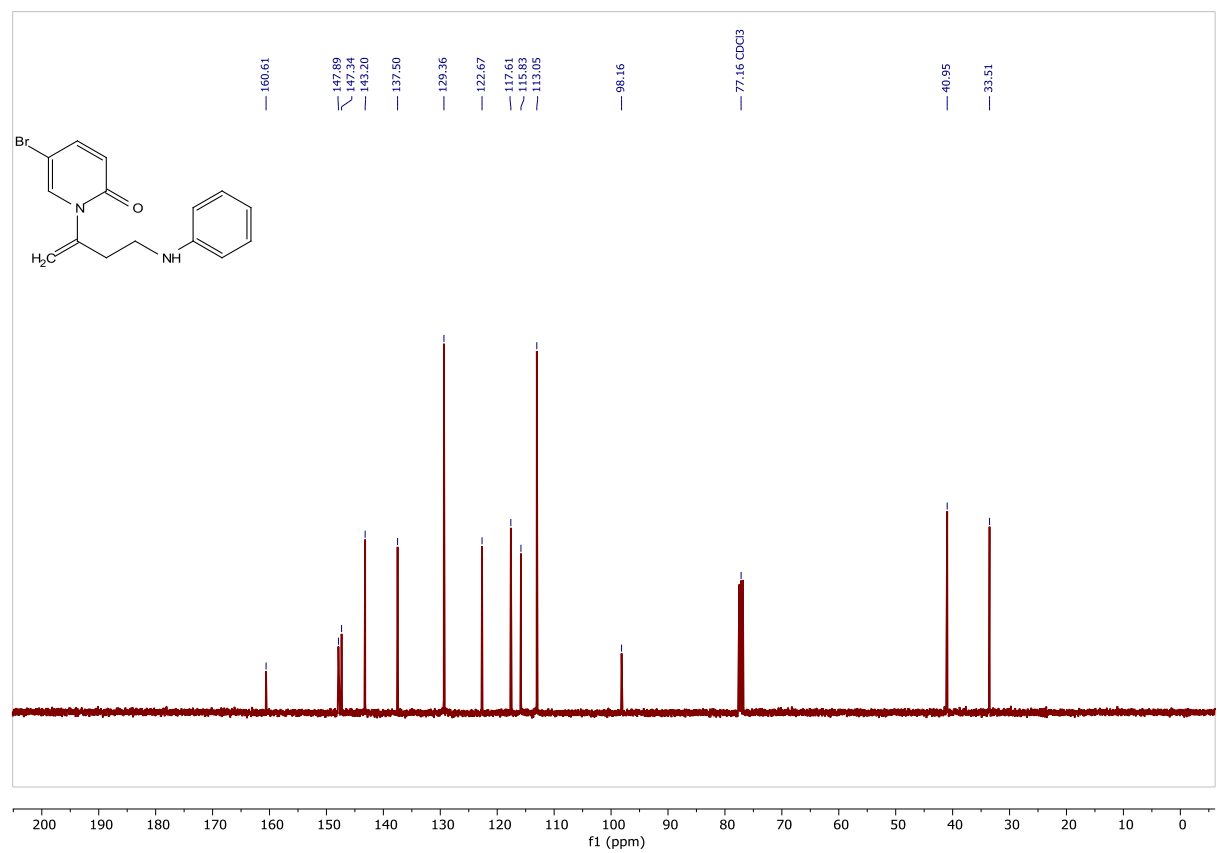

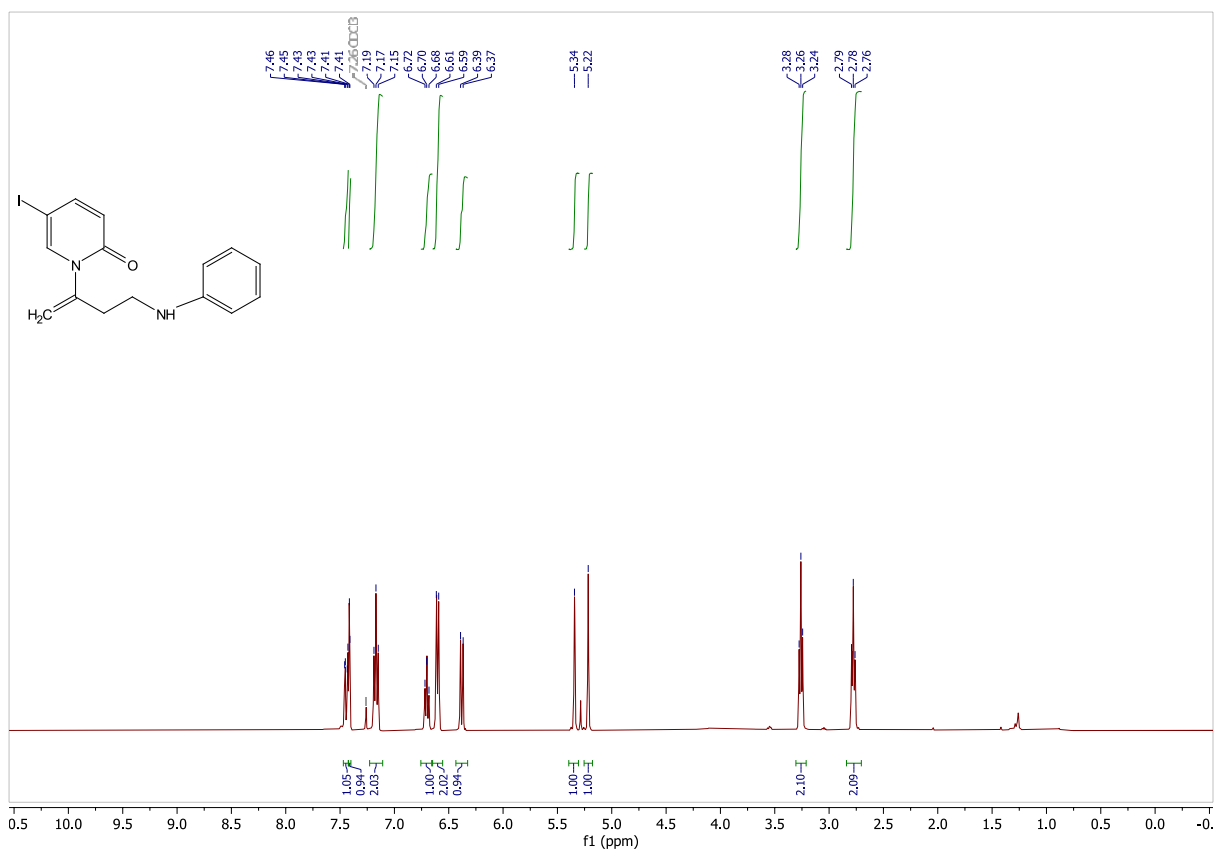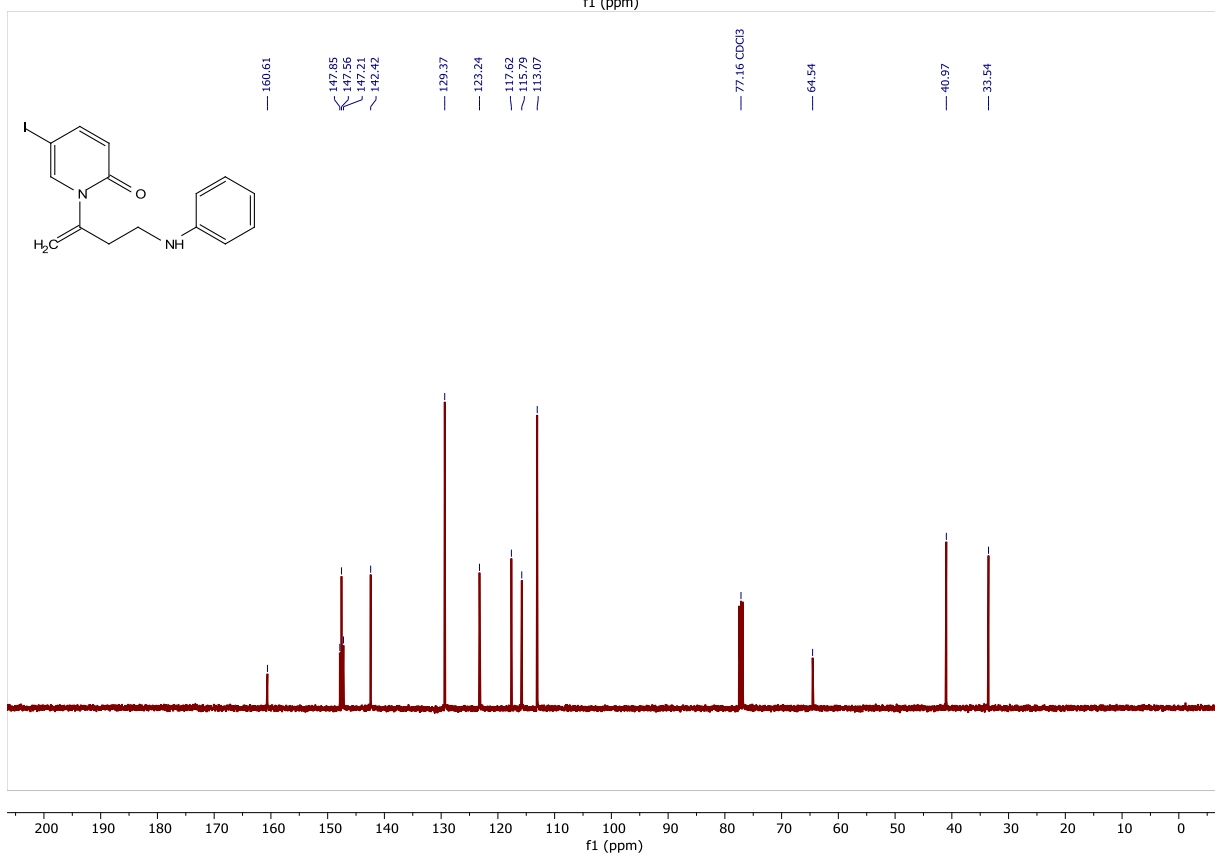

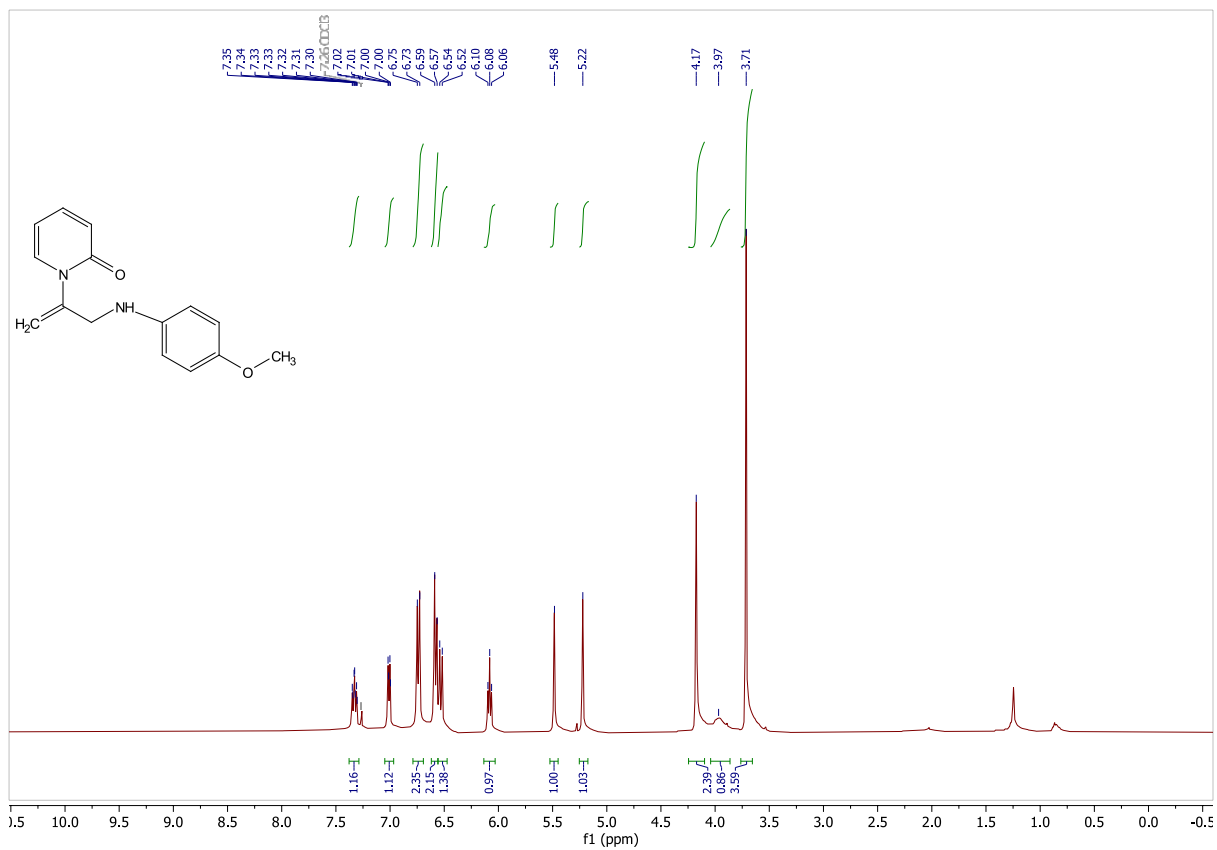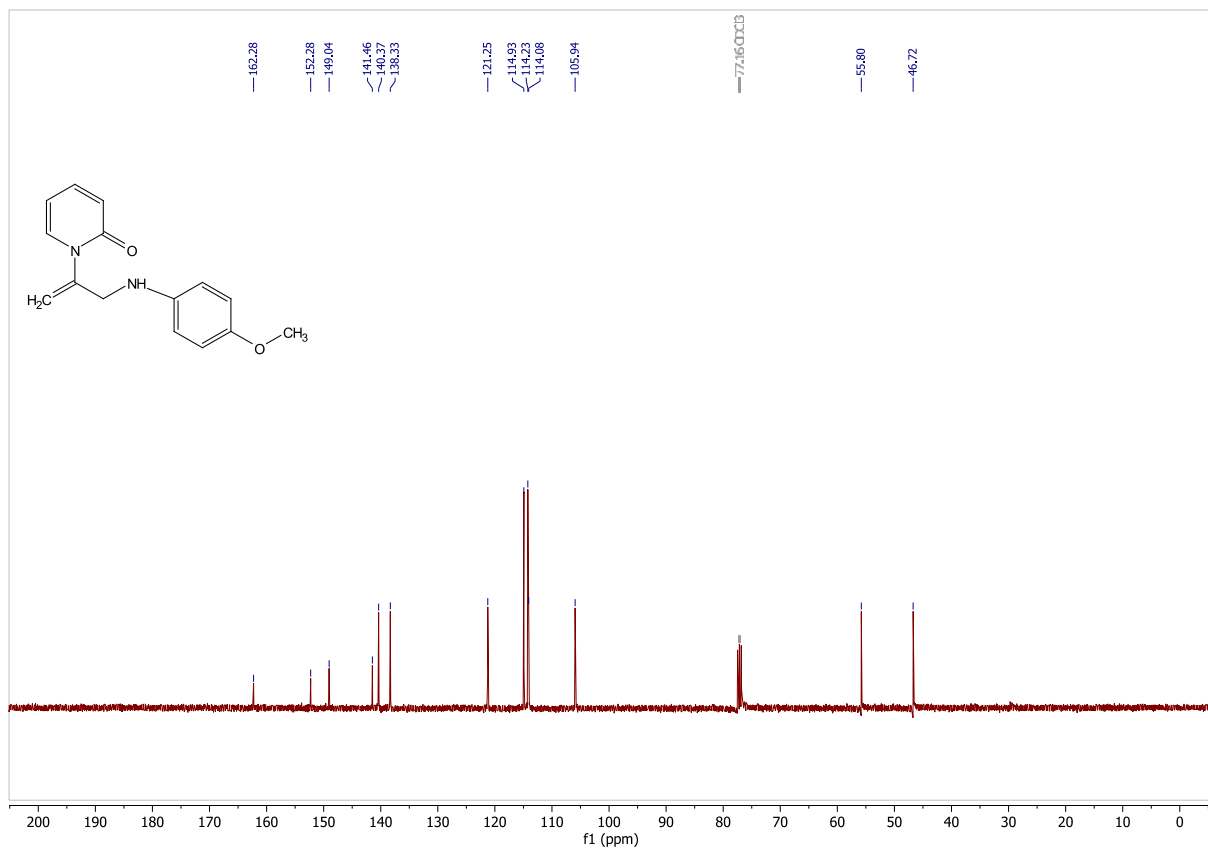

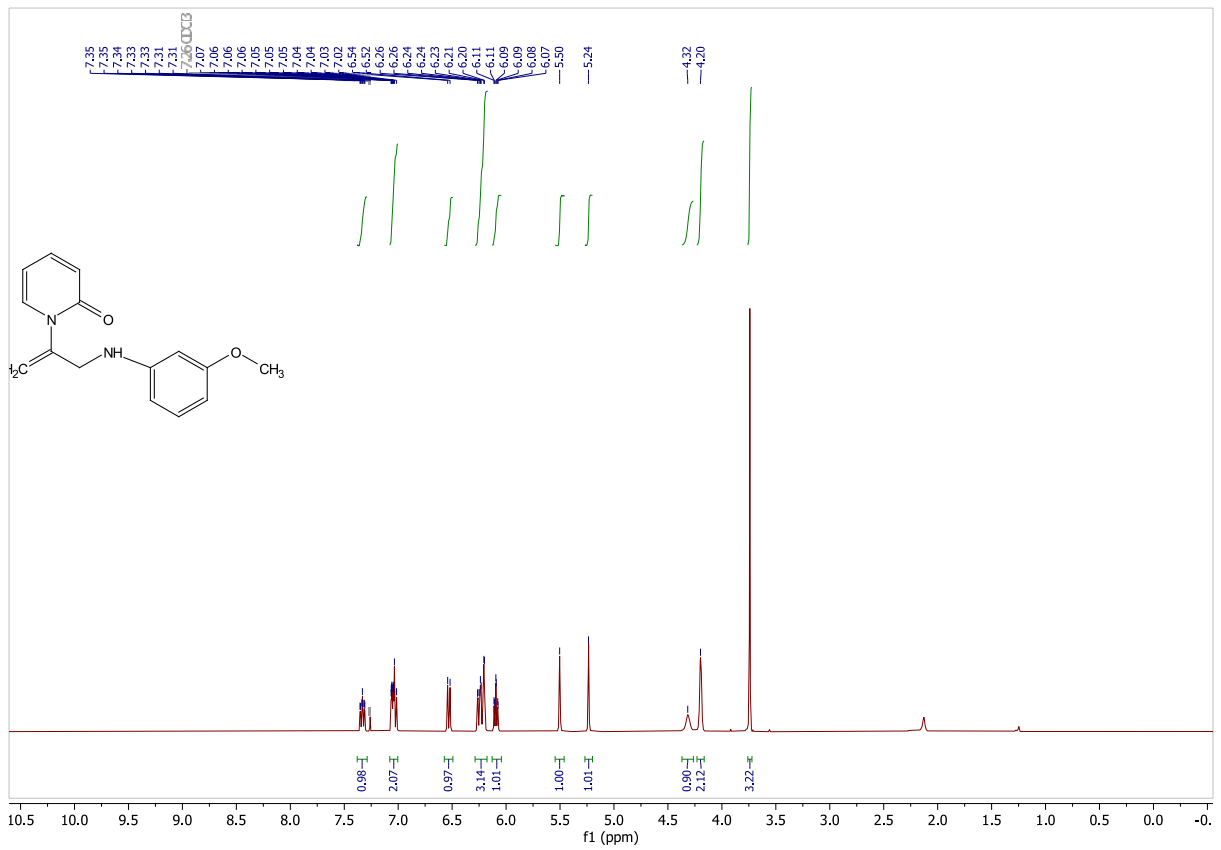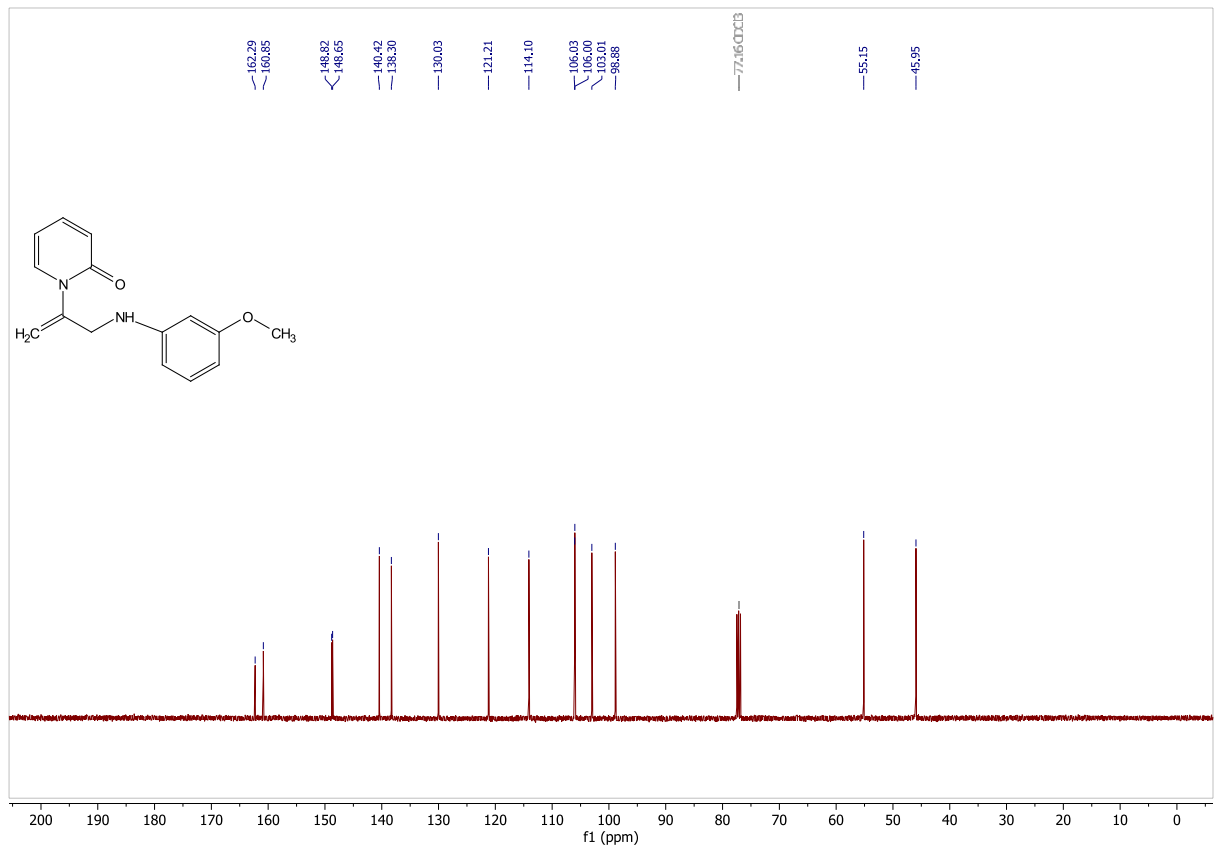







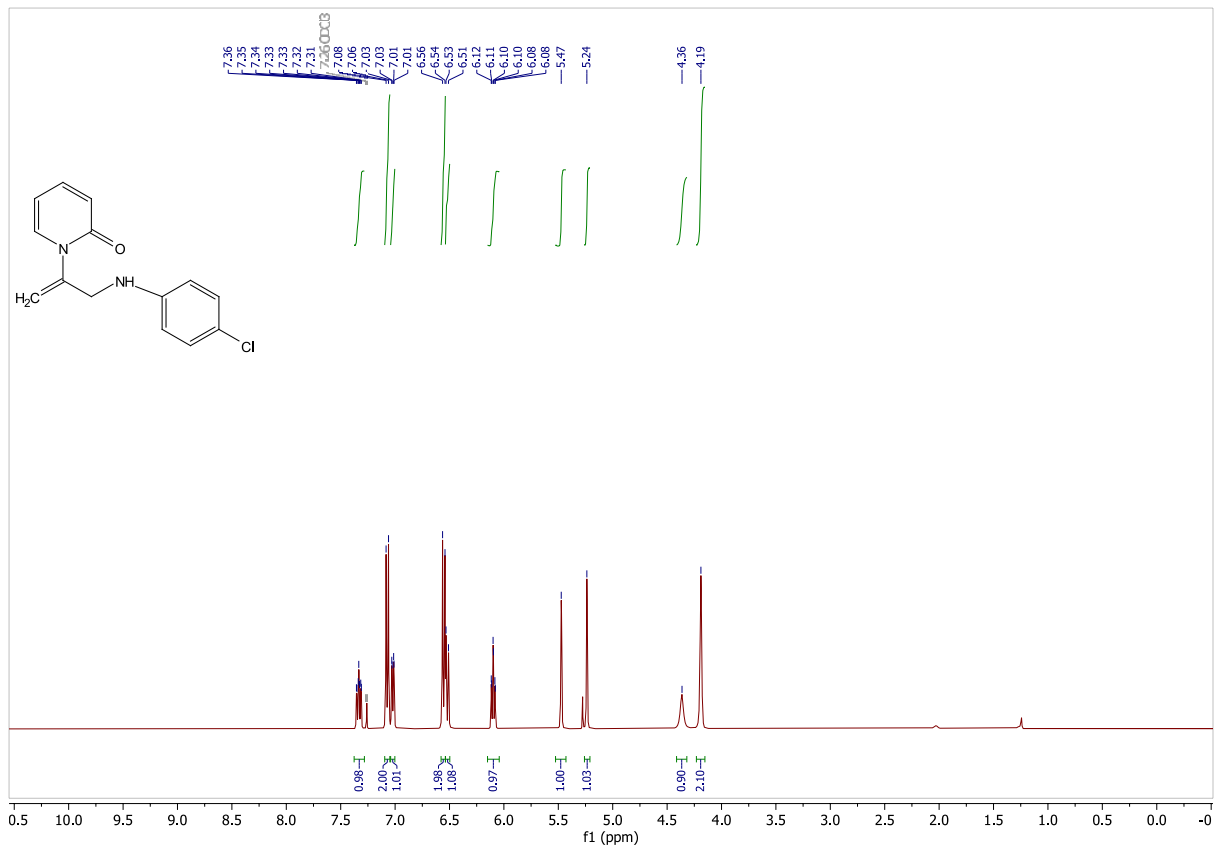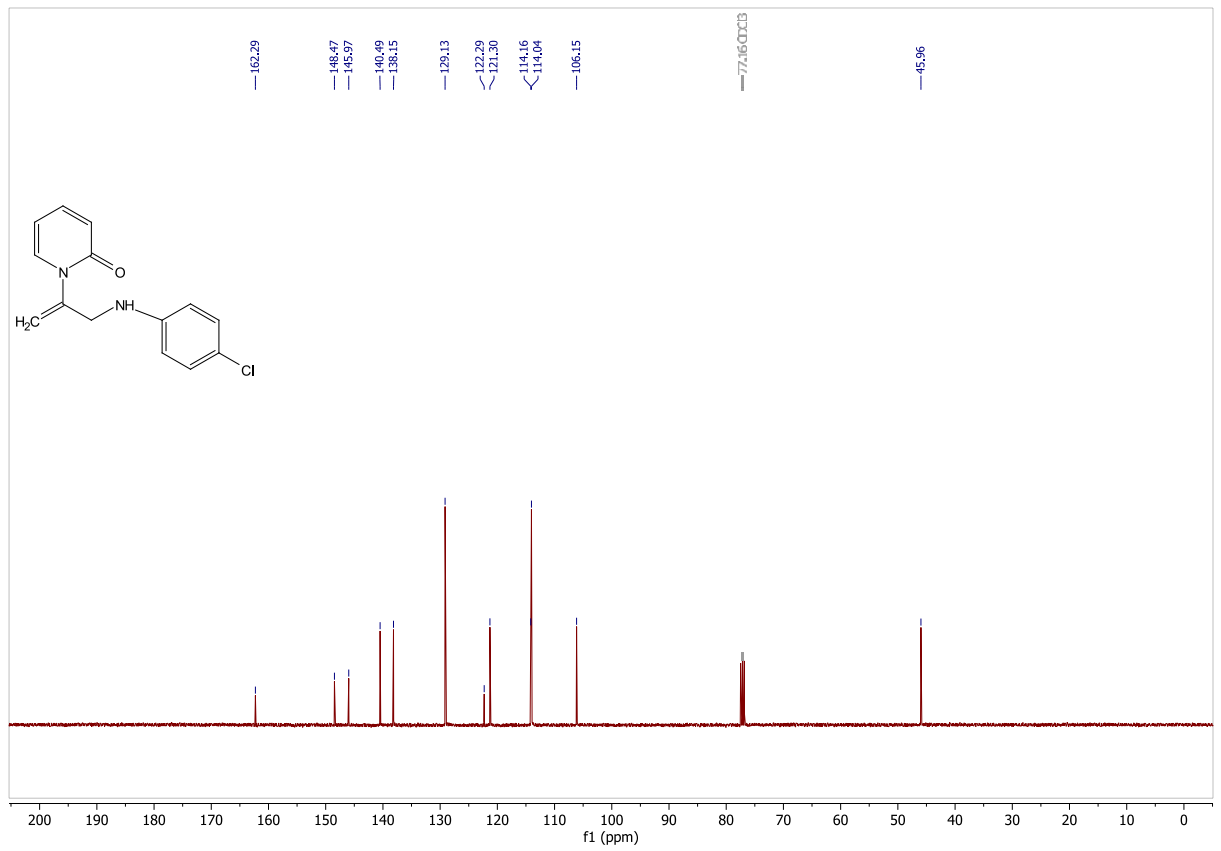

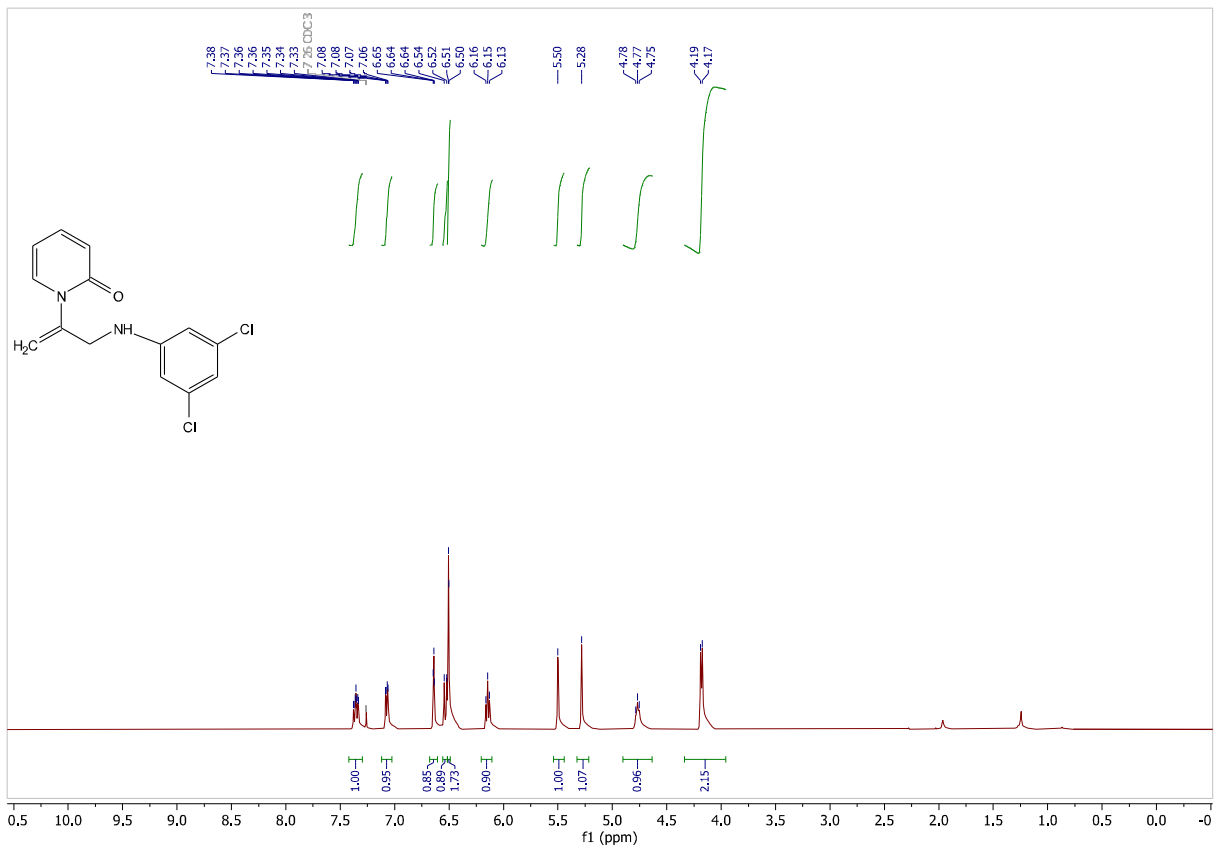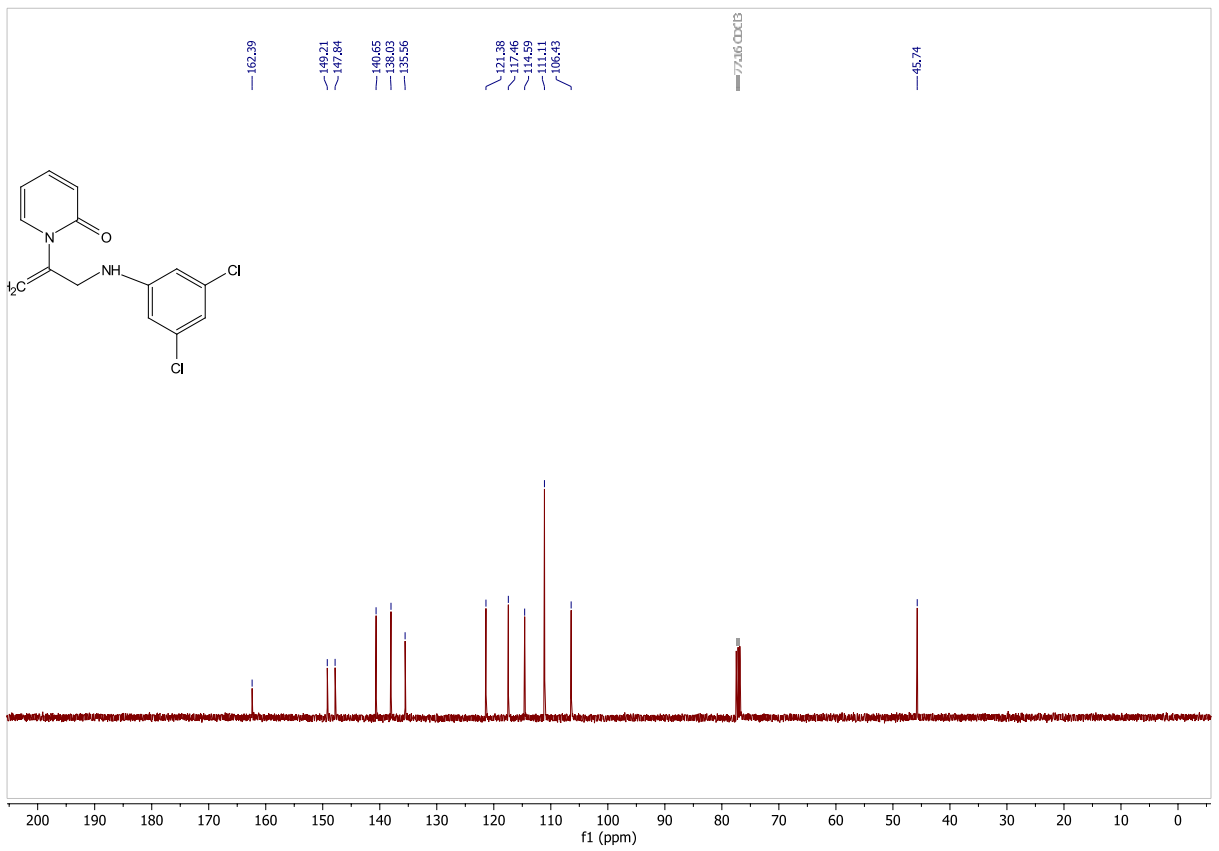

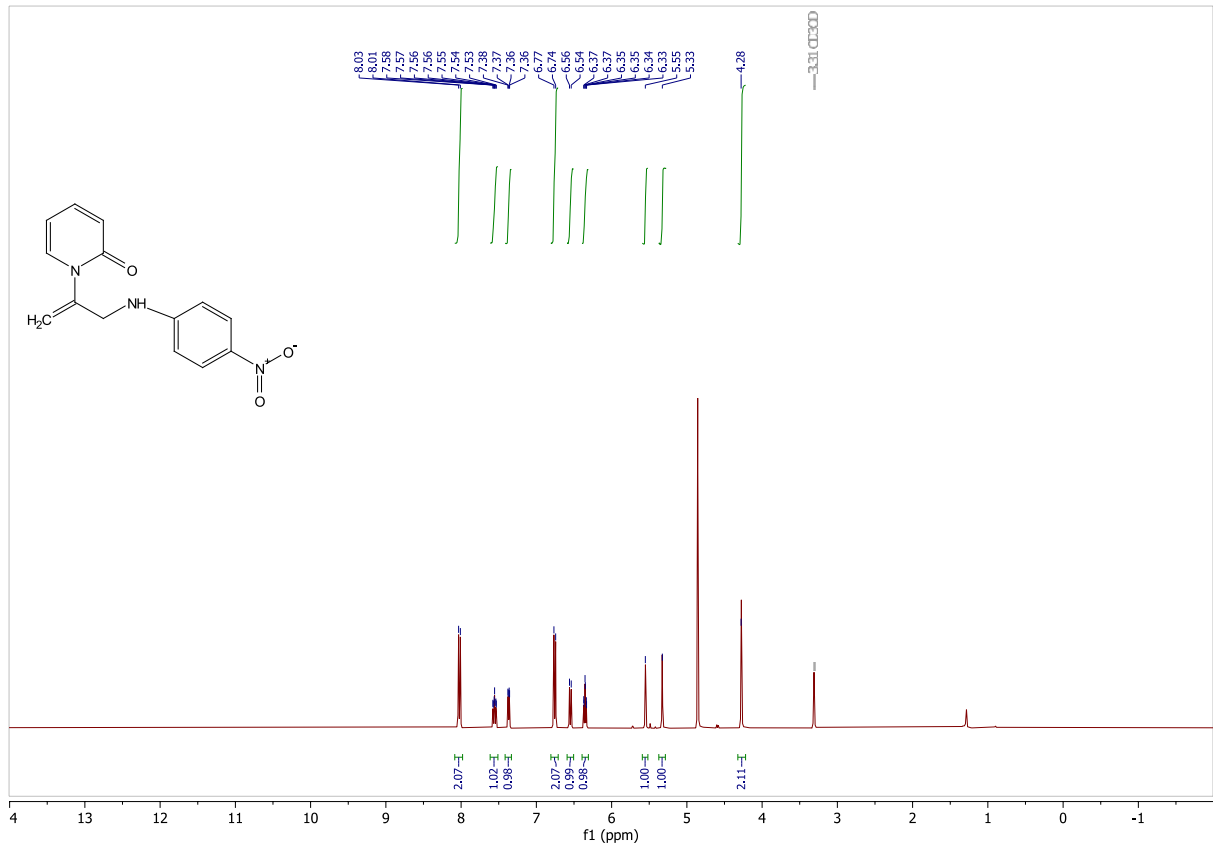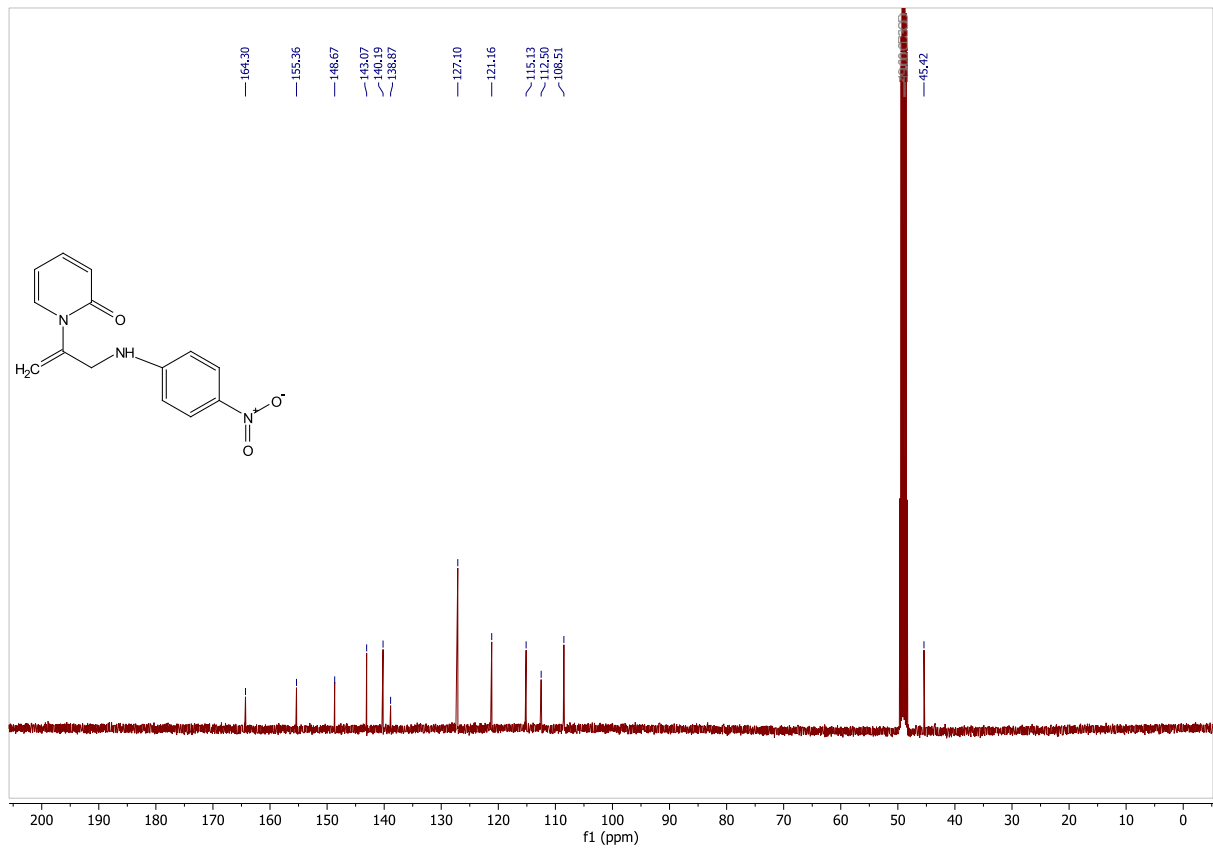

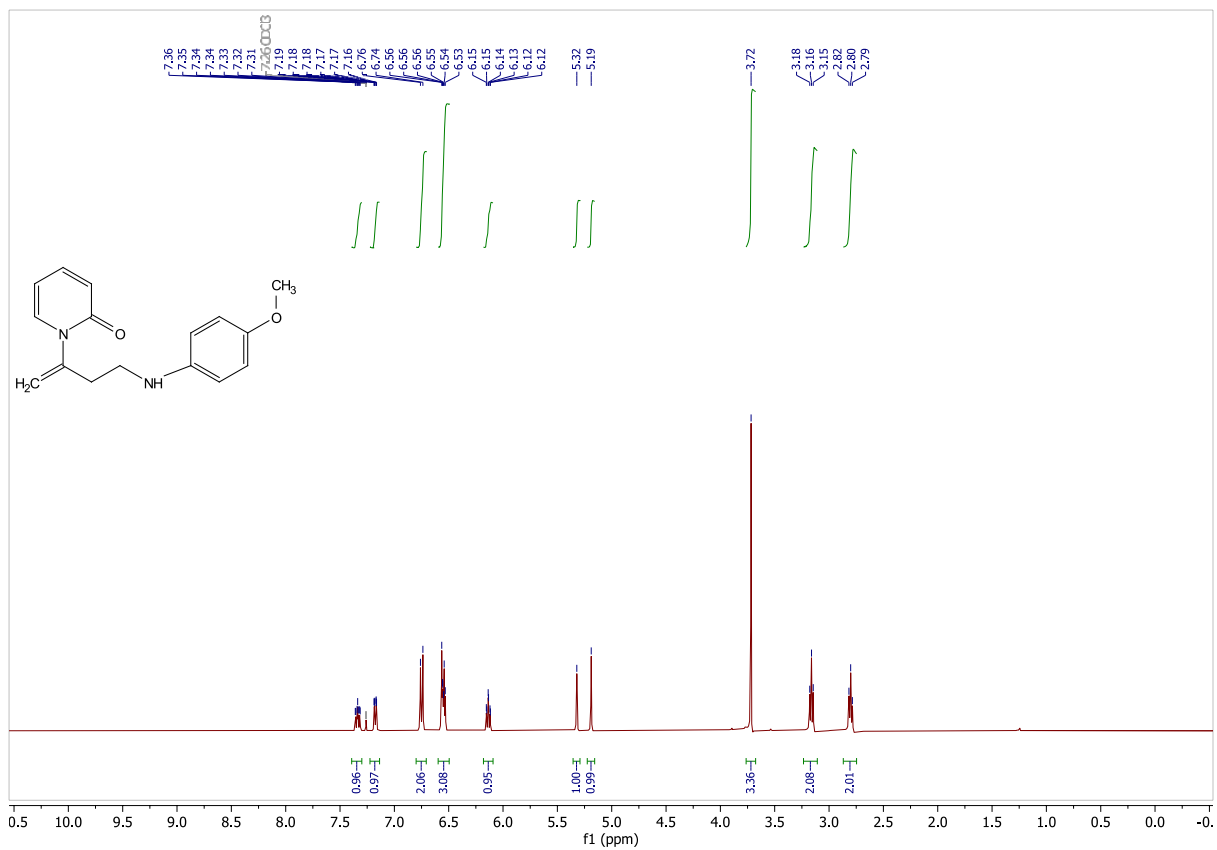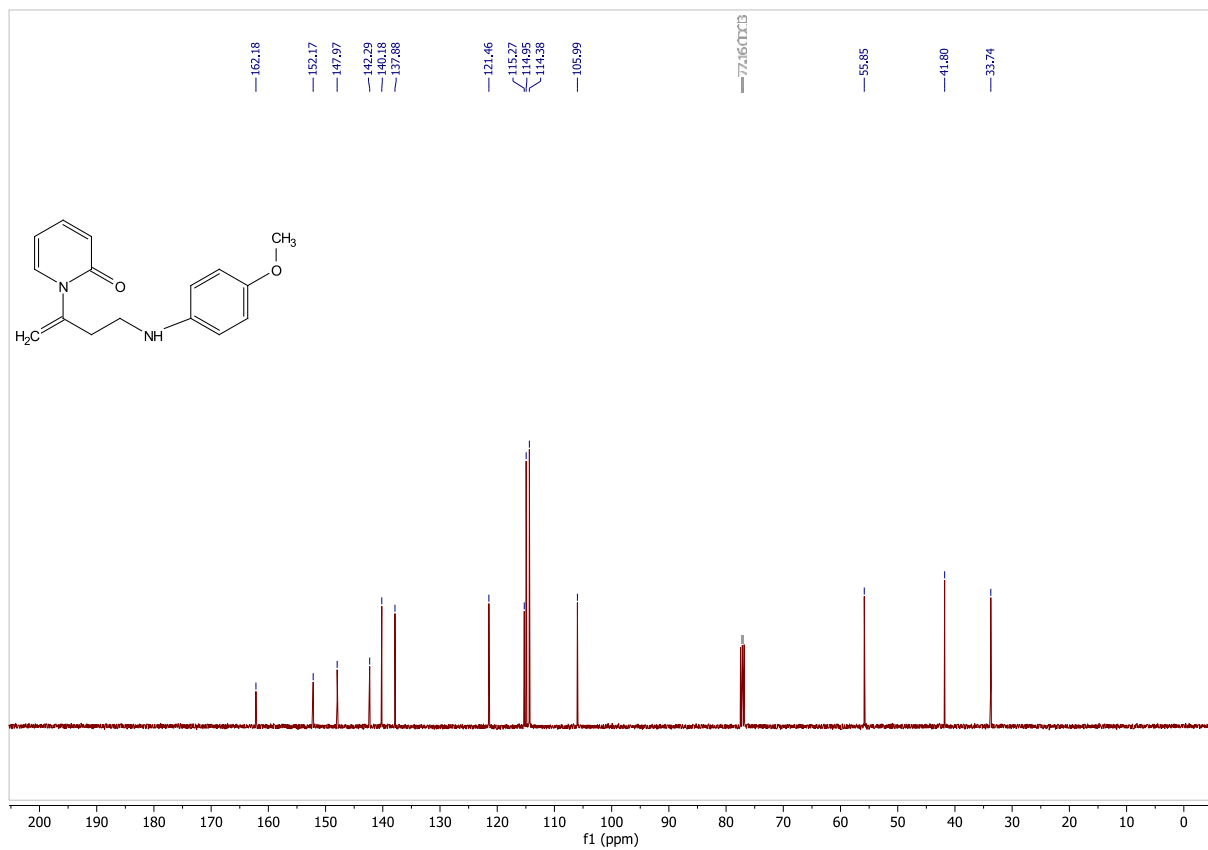

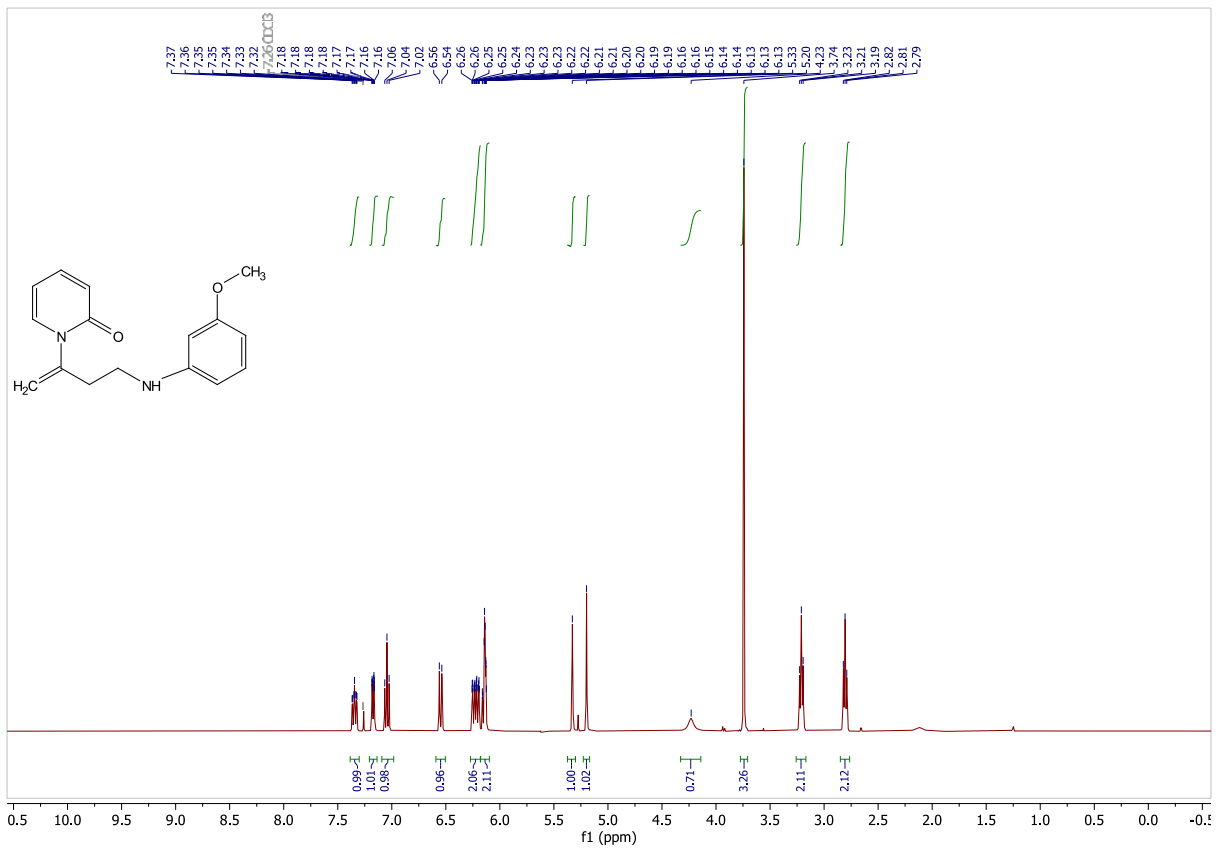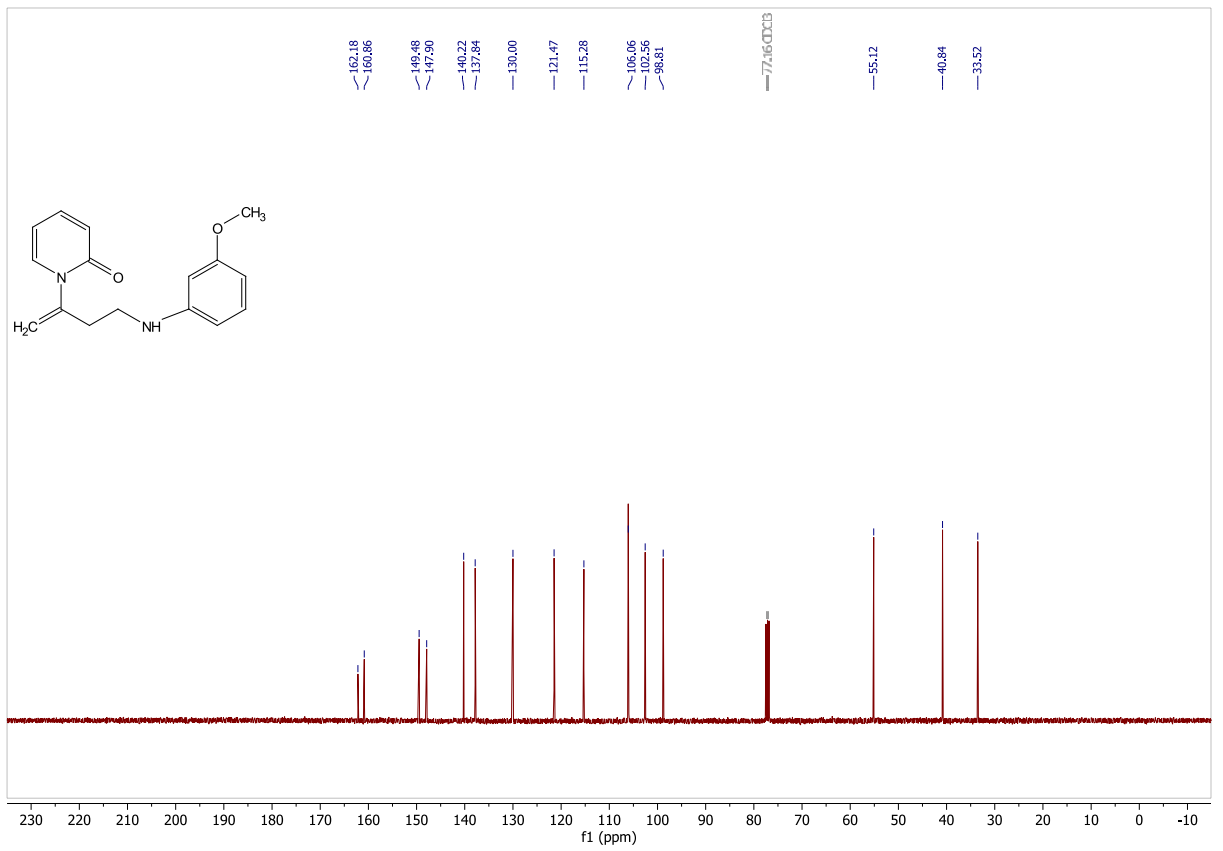

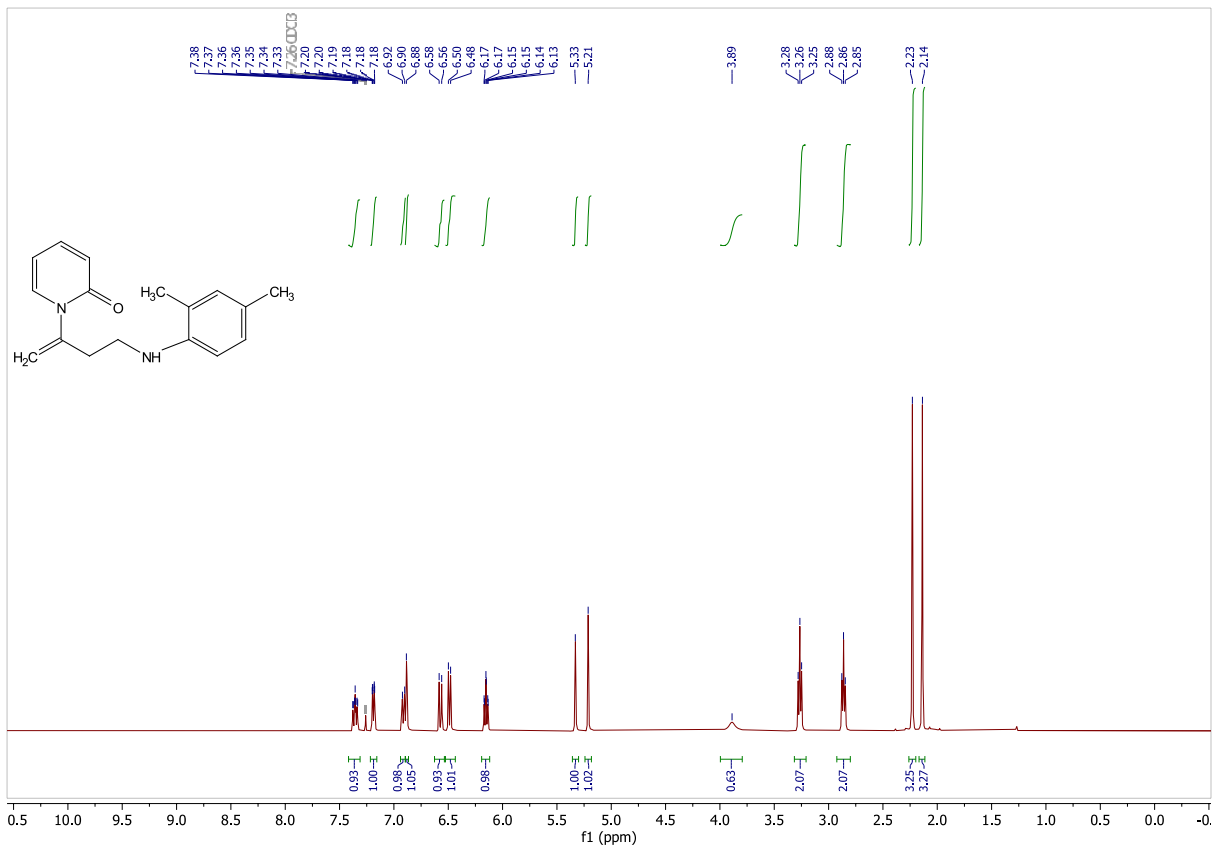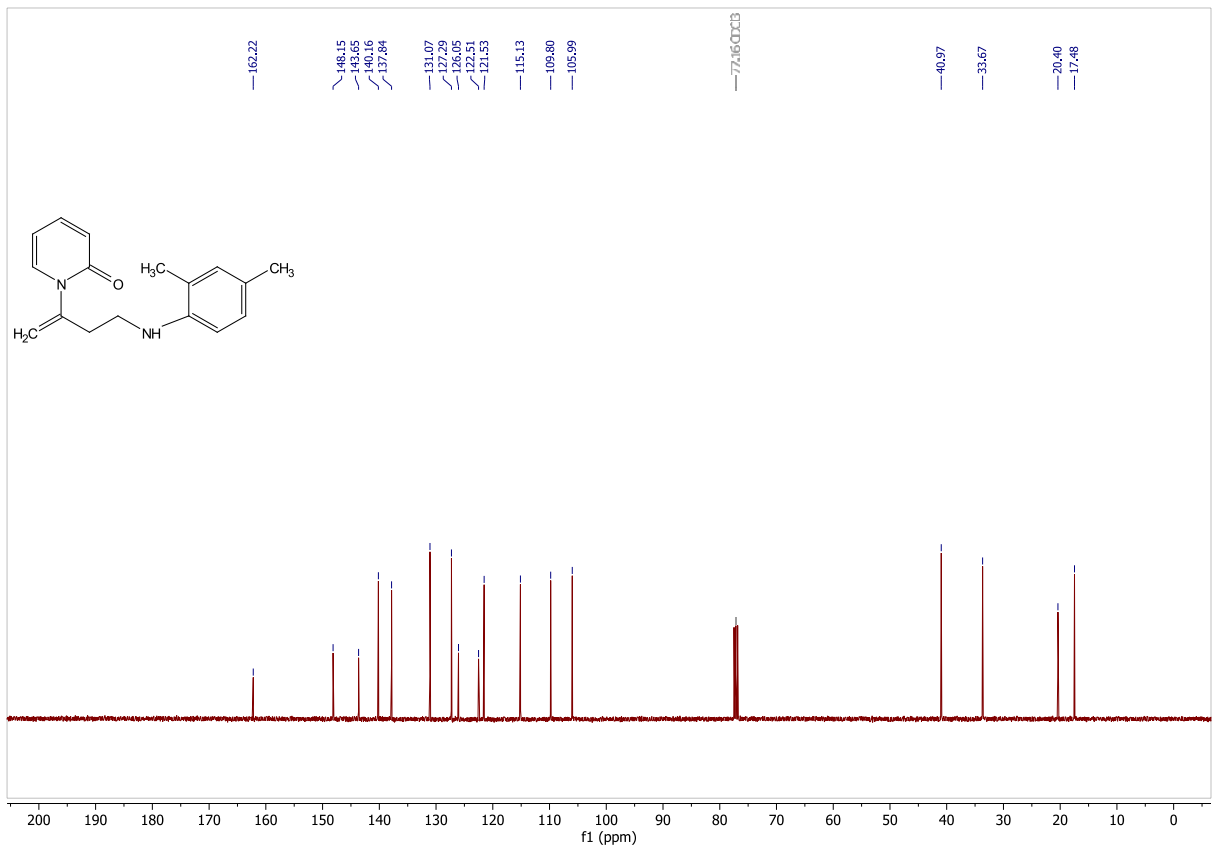

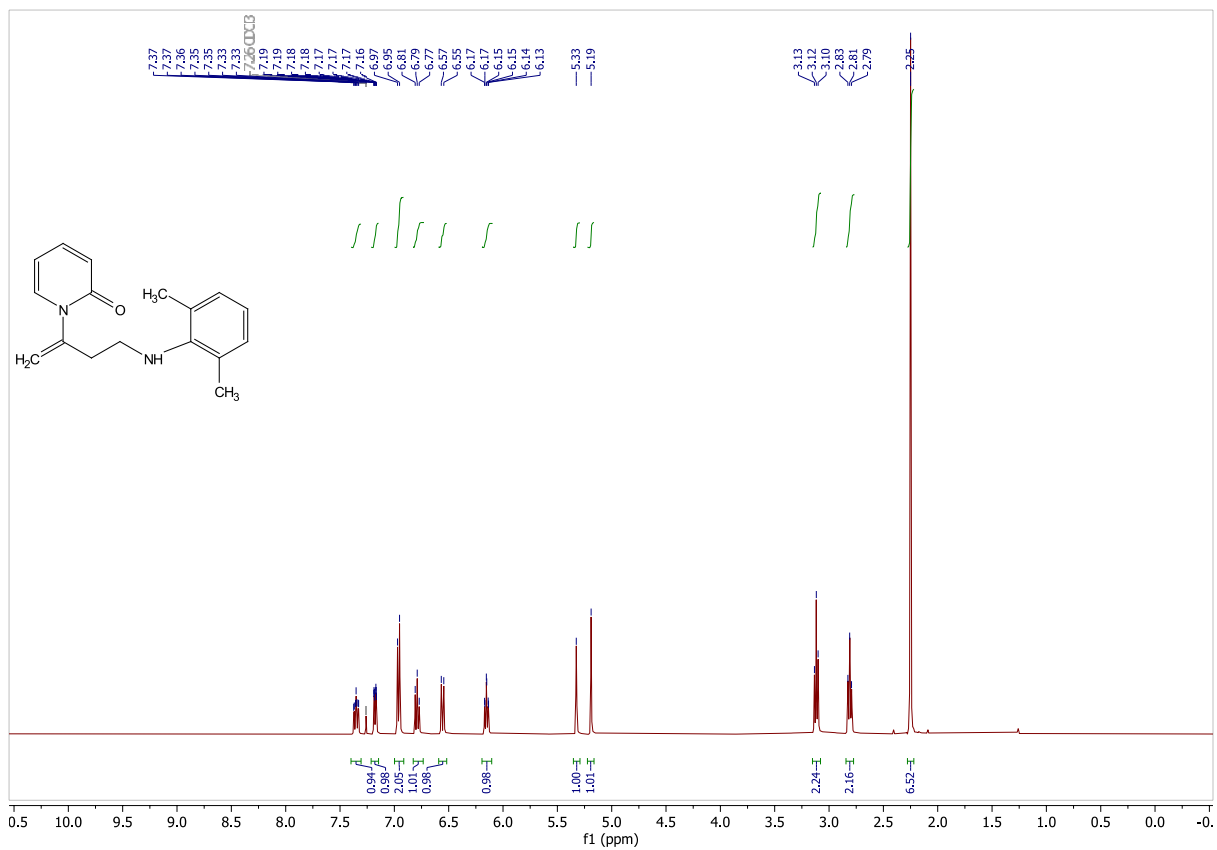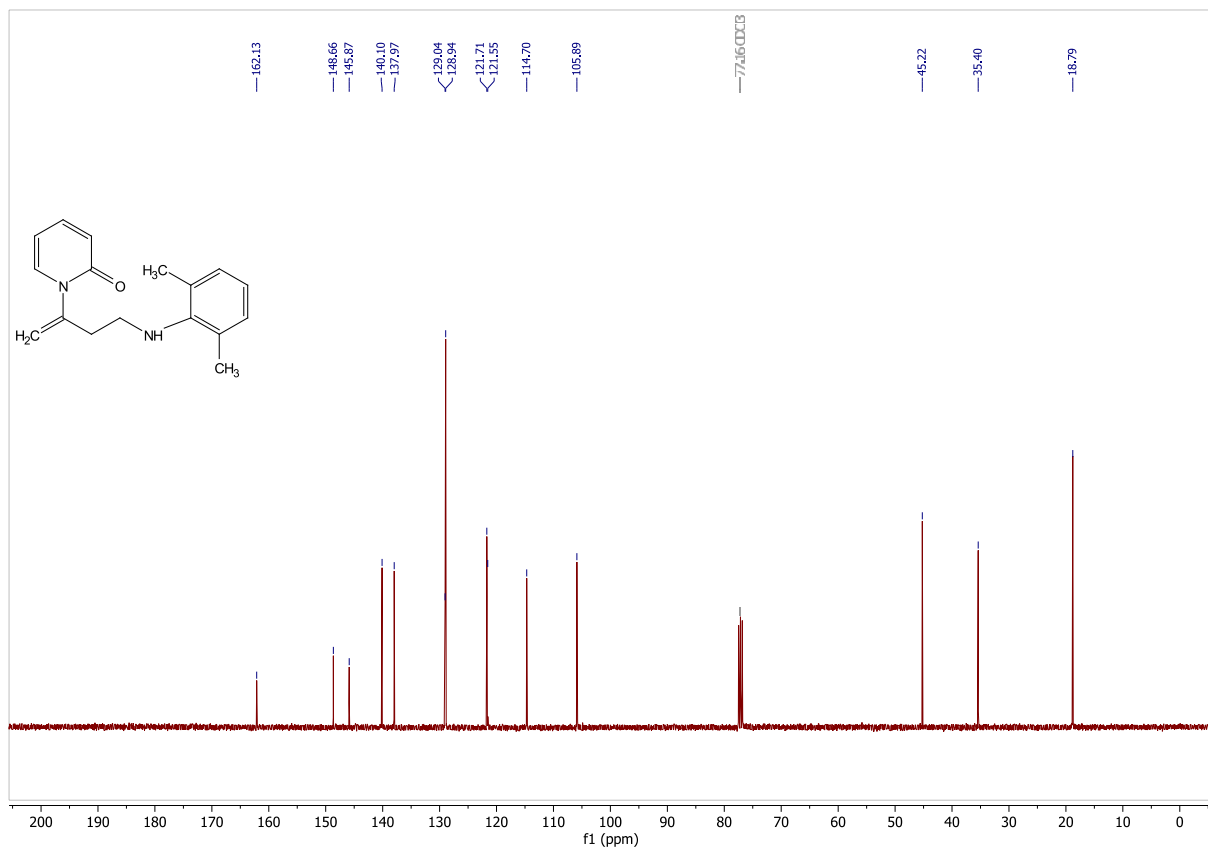





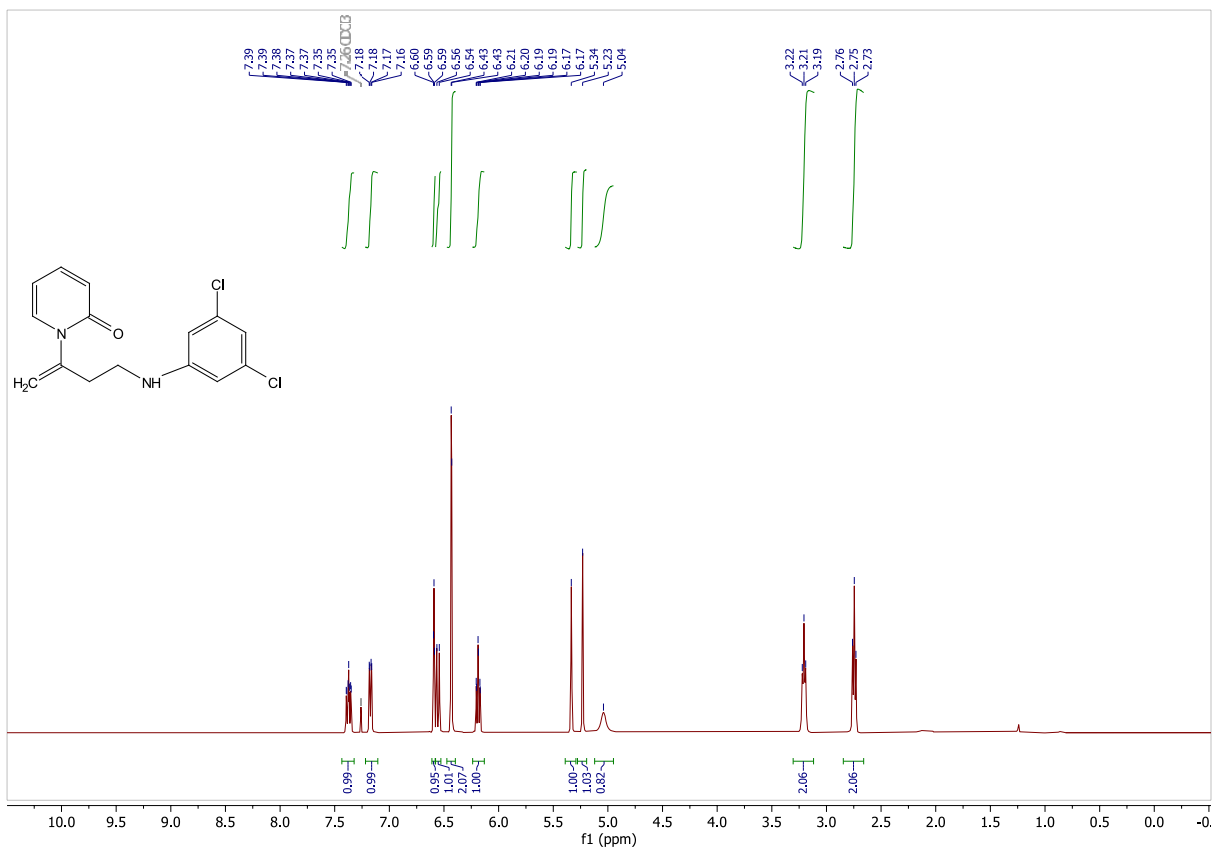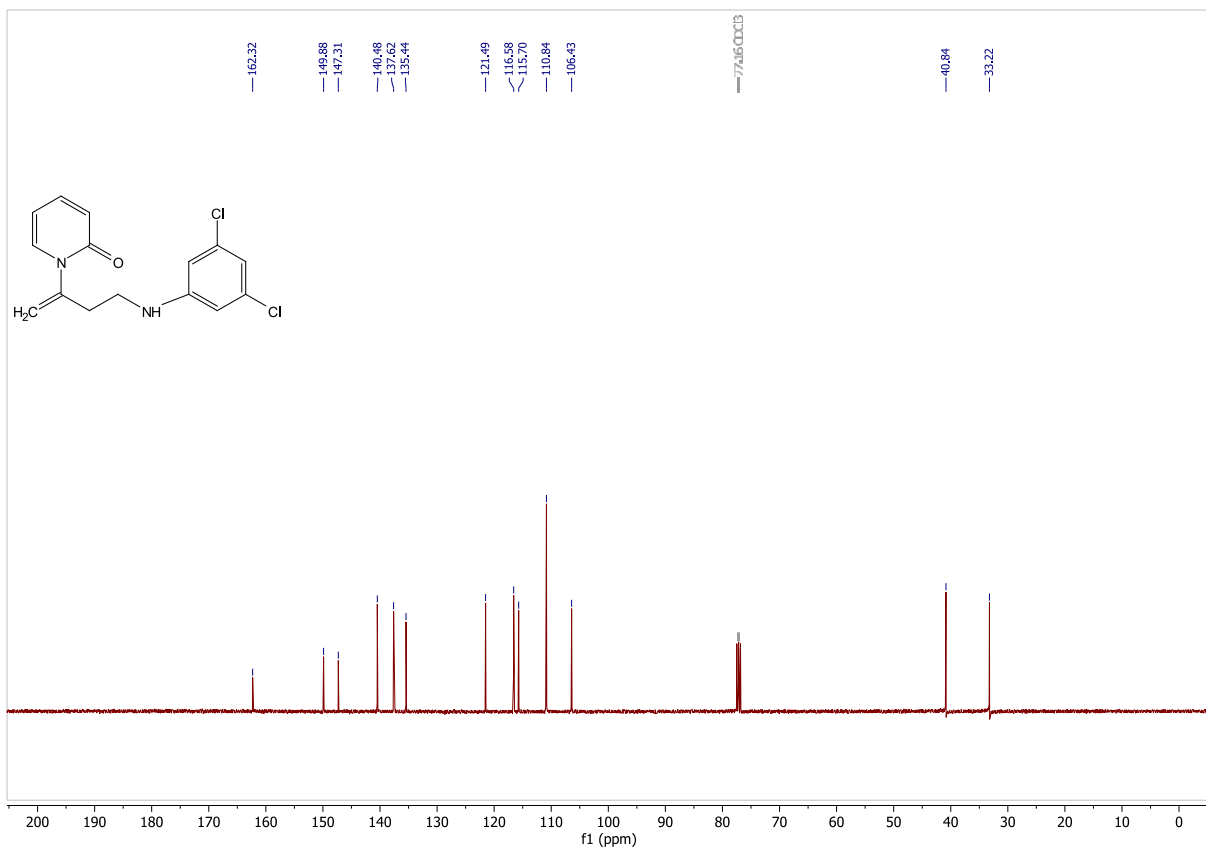

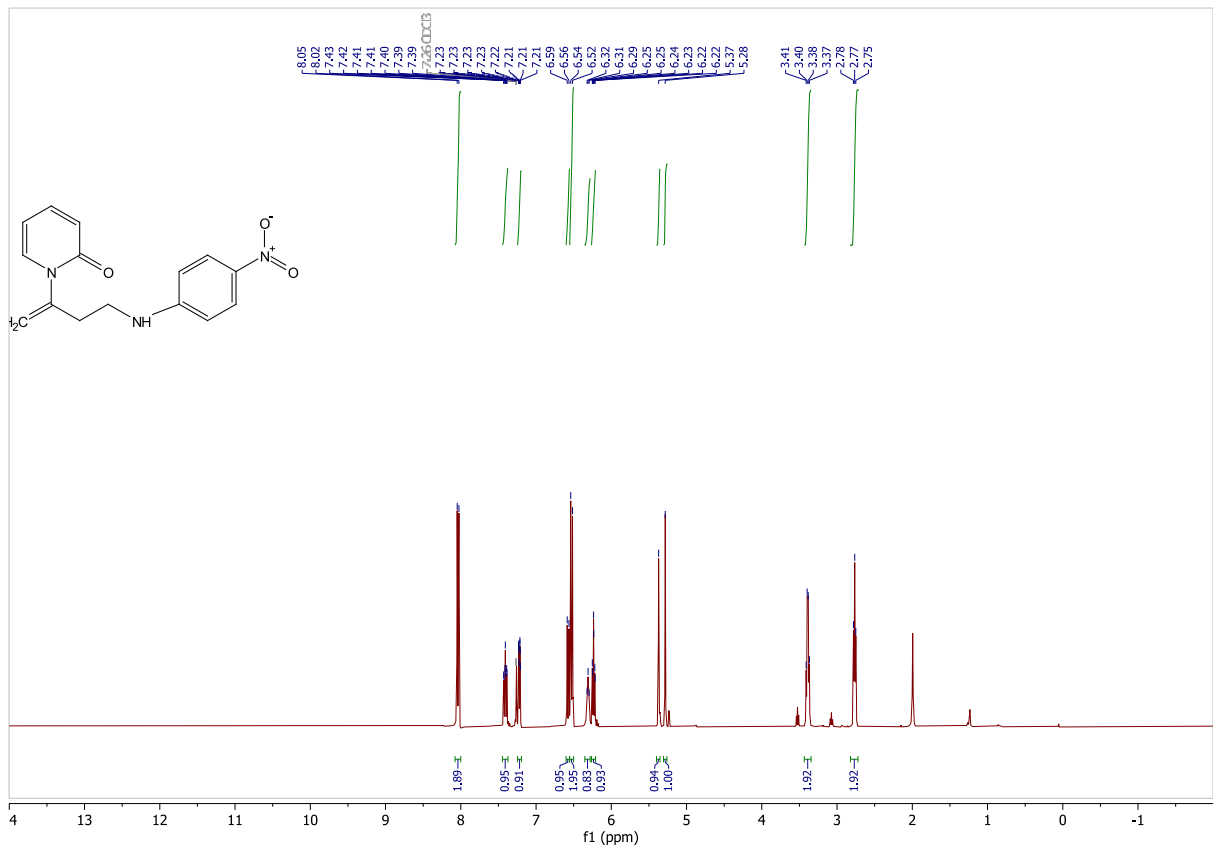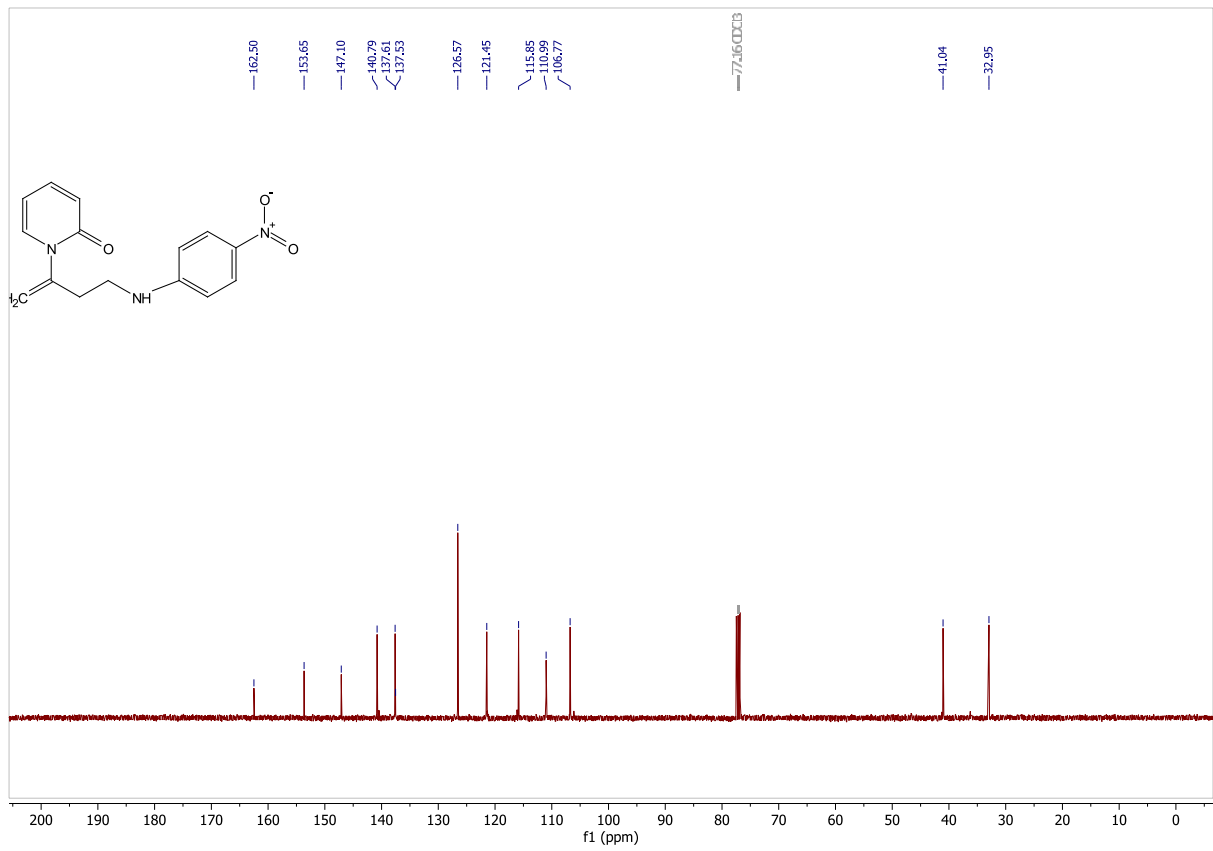

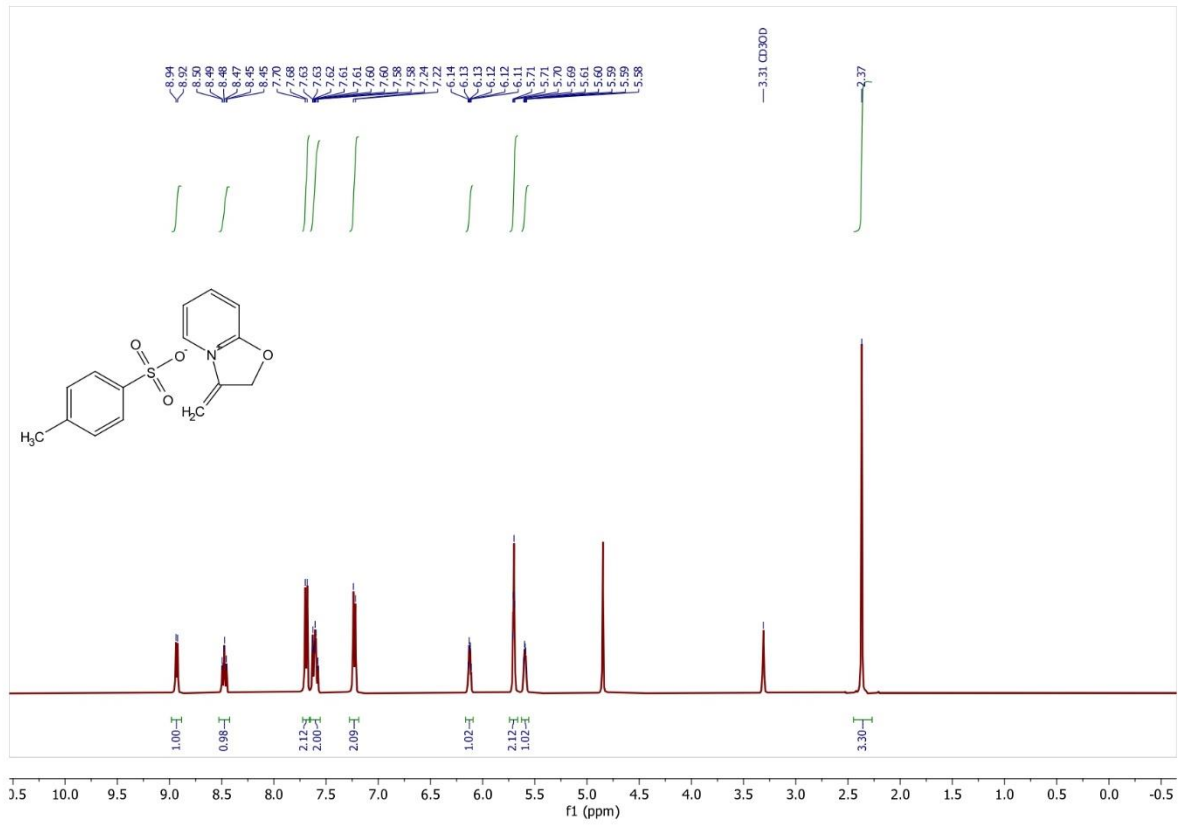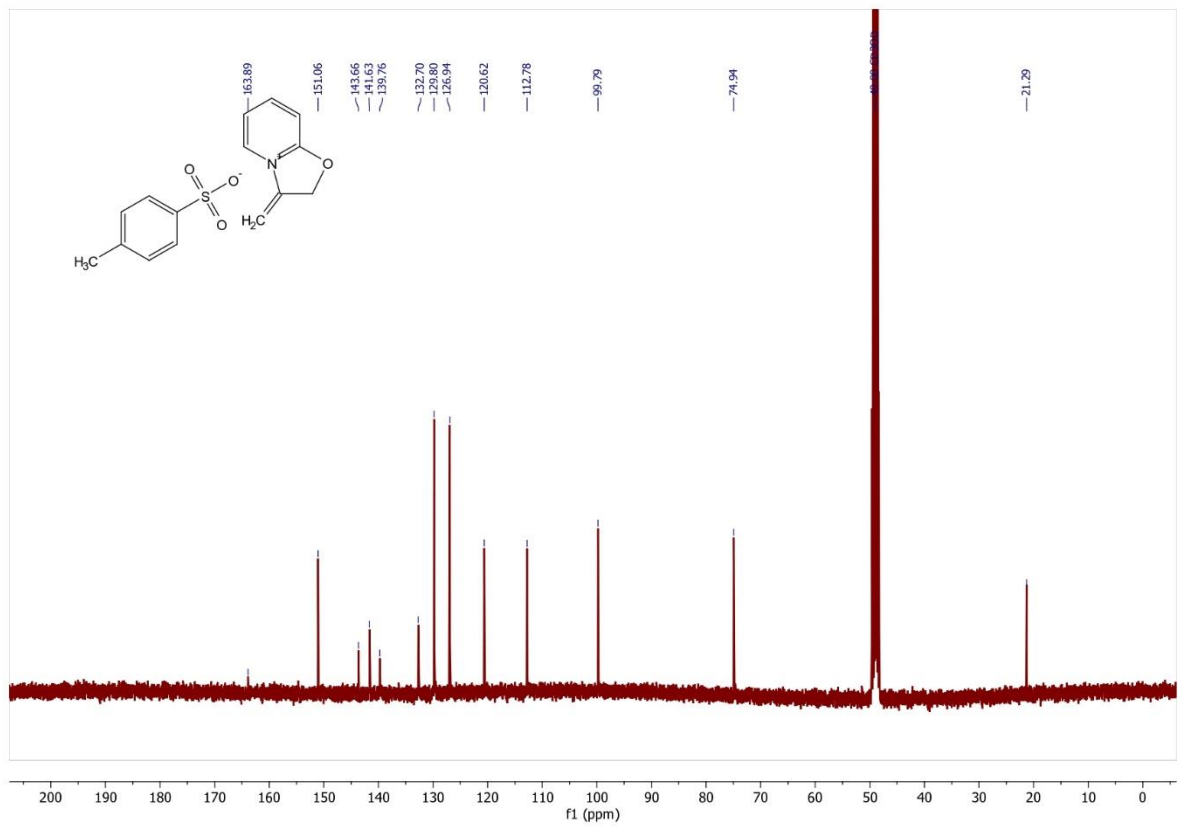

Supplement: d4ob00815d1.pdf [file d4ob00815d1.pdf]
